# Supplementary material for: Efficacy of psychosocial interventions for psychological and pregnancy outcomes in infertile women and men: a systematic review and meta-analysis
Source: PubMed Central journal article supplement — BMJ Open. 2015 Jan 28;5(1):e006592. doi: 10.1136/bmjopen-2014-006592 (PMC4316425; doi:10.1136/bmjopen-2014-006592), 2015-01-28
Supplement: bmjopen-2014-006592.draft_revisions.pdf [file bmjopen-2014-006592.draft_revisions.pdf]

# BMJ Open

## Efficacy of psychosocial interventions for psychological and pregnancy outcomes in infertile women and men: A systematic review and meta-analysis

|                                 |                                                                                                                                                                                                                                                                                                                                                                                                                                                                                          |
|---------------------------------|------------------------------------------------------------------------------------------------------------------------------------------------------------------------------------------------------------------------------------------------------------------------------------------------------------------------------------------------------------------------------------------------------------------------------------------------------------------------------------------|
| Journal:                        | <i>BMJ Open</i>                                                                                                                                                                                                                                                                                                                                                                                                                                                                          |
| Manuscript ID:                  | bmjopen-2014-006592                                                                                                                                                                                                                                                                                                                                                                                                                                                                      |
| Article Type:                   | Research                                                                                                                                                                                                                                                                                                                                                                                                                                                                                 |
| Date Submitted by the Author:   | 11-Sep-2014                                                                                                                                                                                                                                                                                                                                                                                                                                                                              |
| Complete List of Authors:       | Frederiksen, Yoon; Aarhus University, Department of Psychology and Social Sciences<br>Farver-Vestergaard, Ingeborg; Aarhus University, Department of Psychology<br>Skovgård, Ninna; Aarhus University Hospital, Skejby Fertility Clinic<br>Ingerslev, Hans Jakob; Aarhus University Hospital, Center for Preimplantation Genetic Diagnosis/The Fertility Clinic<br>Zachariae, Robert; Aarhus University Hospital, Department of Oncology;<br>Aarhus University, Department of Psychology |
| <b>Primary Subject Heading</b>: | Evidence based practice                                                                                                                                                                                                                                                                                                                                                                                                                                                                  |
| Secondary Subject Heading:      | Reproductive medicine                                                                                                                                                                                                                                                                                                                                                                                                                                                                    |
| Keywords:                       | Infertility, Psychosocial intervention, distress, pregnancy                                                                                                                                                                                                                                                                                                                                                                                                                              |
|                                 |                                                                                                                                                                                                                                                                                                                                                                                                                                                                                          |

SCHOLARONE™  
Manuscripts

Only

1 **Title Page****Efficacy of psychosocial interventions for psychological and pregnancy outcomes in infertile women and men: A systematic review and meta-analysis**

Yoon Frederiksen, Ingeborg Farver-Vestergaard, Ninna Grønhøj Skovgård, Hans Jakob Ingerslev, Robert Zachariae

Unit for Psychooncology and Health Psychology, Department of Psychology, University of Aarhus, 8000 Aarhus, Denmark Yoon Frederiksen MSc. Psychology, PhD-fellow Unit for Psychooncology and Health Psychology, Department of Psychology and Behavioural Science, University of Aarhus, 8000 Aarhus, Denmark Ingeborg Farver-Vestergaard MSc., Psychology, PhD-fellow Unit for Psychooncology and Health Psychology, Department of Psychology and Behavioural Science, Aarhus University, 8000 Aarhus, Denmark Ninna Grønhøj Skovgaard, research assistant, Skejby Fertility Clinic, Aarhus University Hospital, 8200 Aarhus Denmark. Hans Jakob Ingerslev, Professor, MD, DMSc, Unit for Psychooncology and Health Psychology, Department of Psychology, Aarhus University, 8000 Aarhus, Denmark Department of Oncology, Aarhus University Hospital, 8000 Aarhus Denmark Robert Zachariae, DMSci., professor.

Correspondence to: Yoon Frederiksen [yoanf@psy.au.dk](mailto:yoanf@psy.au.dk) Phone no. +45 8716 5872

Keywords: infertility/psychosocial intervention/distress/pregnancy

Word count: 4.852

Author statement: The Corresponding Author has the right to grant on behalf of all authors and does grant on behalf of all authors, an exclusive licence (or non exclusive for government employees) on a worldwide basis to the BMJ Publishing Group Ltd to permit this article (if accepted) to be published in BMJ editions and any other BMJ PGL products and sublicences such use and exploit all subsidiary rights, as set out in our licence.

Competing interest: All authors have completed the Unified Competing Interest form and are available upon request from the Corresponding Author

## 5 Abstract

6 **Objective:** To evaluate the evidence on the efficacy of psychosocial interventions for improving  
7 pregnancy rates and reducing distress for couples in treatment with assisted reproductive technology  
8 (ART).

9 **Design:** Systematic review and meta-analysis.

10 **Data sources** PsycINFO, PubMed, Embase, CINAHL, Web of Science and The Cochrane Library  
11 between 1978 and April 2014.

12 **Study selection** Studies were considered eligible if they evaluated the effect of any psychosocial  
13 intervention on clinical pregnancy and/or distress in infertile participants, used a quantitative ap-  
14 proach, and were published in English.

15 **Data extraction** Study characteristics and results were extracted and the methodological quality  
16 assessed. Effect sizes (Hedges  $g$ ) were pooled using a random effect model. Heterogeneity was as-  
17 sessed using the  $Q$  statistic and  $I^2$ , and publication bias evaluated using Eggers' method. Possible  
18 moderators and mediators were explored with meta-ANOVAs and meta-regression.

19 **Results** We identified 39 eligible studies (total  $N = 2746$  men and women) assessing the effects of  
20 psychological treatment on pregnancy rates and/or adverse psychological outcomes, including de-  
21 pressive symptoms, anxiety, infertility stress, marital function. Statistically significant and robust  
22 overall effects of psychosocial intervention were found for both clinical pregnancy ( $RR = 2.01$ ;  $CI$ :  
23  $1.48-2.73$ ;  $p < 0.001$ ) and psychological outcomes (Hedges  $g = 0.59$ ;  $CI$ :  $0.38-0.80$ ;  $p = 0.001$ ). The  
24 pooled effect sizes (ES) for psychological outcomes were generally larger for women ( $g$ :  $0.51-0.73$ )  
25 than men ( $0.13-0.34$ ), but the difference only reached statistical significance for depressive symp-  
26 toms ( $p = 0.004$ ). Cognitive behavioral therapy (CBT) ( $g = 1.15$ ) appeared more effective than mind-  
27 body interventions ( $g = 0.41$ ), but the difference did not reach statistical significance. Finally, meta-  
28 regression indicated that larger reductions in anxiety were associated with greater improvement in  
29 pregnancy rates (Slope:  $0.19$ ;  $p = 0.004$ ).

30 **Conclusion** The present meta-analysis suggests that psychosocial interventions for couples in  
31 treatment for infertility, in particular CBT, could be efficacious, both in reducing psychological  
32 distress and in improving clinical pregnancy rates.

33 **Strengths and limitations of this study**

- 34 • A major strength of this study is the extensive search of various databases from 1978 to
- 35 April 2014, as well as an extended detailed methodological assessment
- 36 • Further analyses were performed to account for publication bias, yielding conservative ef-
- 37 fect sizes and thus strengthening the robustness of the estimates
- 38 • Substantial variation of the methodological quality may have influenced the interpretation of
- 39 the outcomes
- 40 • Heterogeneity was observed for several of the outcomes

## 41 Introduction

42 Fecundity has become a growing problem for many couples trying to conceive a child and although  
43 not all couples choose to seek medical assistance, more than 10% of the childbearing population has  
44 resorted to assisted reproductive technology (ART) to conceive.<sup>1-5</sup> Being involuntarily childless and  
45 going through various ART procedures imposes considerable stress on the couple, and childlessness  
46 is often perceived as a life crisis where the emotional strain equals that found for traumatic  
47 events.<sup>2,6-10</sup> Although infertile couples may be considered mentally healthy in general,<sup>11</sup> several  
48 studies indicate that coping with infertility is associated with periodically heightened levels of psy-  
49 chological symptoms of distress, depression and anxiety.<sup>12,13</sup> Feelings of loss, grief, anger, and sad-  
50 ness are not uncommon, and women often report bodily disparagement, lack of femininity, shame,  
51 and self-blame.<sup>2,14</sup> There is some evidence to suggest that dysregulation in the uterus microenvi-  
52 ronment may influence the ability to conceive, e.g. oxidative stress and inflammation, ,<sup>15,16</sup> which  
53 may be promoted by psychological distress.<sup>17,18</sup> Such findings have lead several studies to investi-  
54 gate possible links between mental state and pregnancy outcome.<sup>10,19-24</sup> Although study results have  
55 been mixed, reviews of the literature have generally reached the conclusion that psychosocial fac-  
56 tors such as depressive symptoms, anxiety, distress, and certain coping strategies are linked to re-  
57 duced chances of pregnancy.<sup>25-27</sup> Two recently published meta-analyses, however, report conflicting  
58 results.<sup>28,29</sup> Whereas one meta-analysis supported the conclusion that emotional distress may be  
59 critical to the success of fertility treatment outcome,<sup>28</sup> the other did not find sufficient support for

1  
2  
3 60 this hypothesis.<sup>29</sup> The different conclusions could be due to methodological issues, e.g. the chosen  
4  
5 61 measures of distress and definitions of *pregnancy* (e.g. serum positive test, clinical pregnancy, or  
6  
7 62 live birth).  
8  
9

10 63 Nonetheless, the evidence indicating a considerable psychosocial burden associated with infertility  
11  
12 64 and its treatment has inspired several researchers to explore the effect of various psychosocial inter-  
13  
14 65 ventions in reducing distress, improving quality-of-life, and, possibly, optimize the chances of  
15  
16 66 pregnancy.  
17  
18  
19

20 67 So far, three systematic reviews and meta-analyses have presented results of psychological inter-  
21  
22 68 ventions on mental health and pregnancy outcome. Again, the results have been mixed. The first  
23  
24 69 meta-analysis, published in 2003, concluded that psychological intervention appeared to have a  
25  
26 70 beneficial effect on negative emotions,<sup>30</sup> anxiety in particular. An effect of counseling was also  
27  
28 71 found for infertility-related distress, whereas no clear effect was seen on pregnancy rates. Although  
29  
30 72 the original systematic review identified 25 independent studies, the final meta-analysis only in-  
31  
32 73 cluded 8–10 studies selected on the basis of their methodological quality. The second meta-analysis  
33  
34 74 published in 2005 focused on differences in effects related to intervention format, e.g. individu-  
35  
36 75 al/couple vs. group setting.<sup>31</sup> Overall, the results indicated that both individual/couple and group  
37  
38 76 interventions were effective in reducing emotional distress as well as possibly increasing the con-  
39  
40 77 ception rate. In contrast to the two first meta-analyses, which had investigated both controlled and  
41  
42 78 uncontrolled studies, the third meta-analysis from 2009, which only included controlled studies,<sup>32</sup>  
43  
44 79 found no evidence for an effect of psychological interventions on emotional distress. An effect,  
45  
46 80 however, was found for pregnancy rates, but only for couples not in ART.  
47  
48  
49  
50

51  
52 81 Taken together, while showing promising results, the findings of existing quantitative systematic  
53  
54 82 reviews, the most recent published in 2009, are mixed. The literature within this field is expanding  
55  
56 83 and new psychosocial intervention approaches building on existing knowledge and targeting specif-  
57  
58  
59  
60

1  
2  
3 84 ic problems of infertile patients, e.g. mind/body interventions, web-based treatments, and online  
4  
5 85 psycho-education programs, have been evaluated. Furthermore, the more recently published studies  
6  
7 86 have generally used randomized controlled trial designs, a notable strength reducing the risk of bias  
8  
9 87 and making the studies more easily comparable.<sup>33</sup> An updated review and meta-analysis is needed  
10  
11 88 to determine to which degree psychosocial interventions may reduce infertility related distress relat-  
12  
13 89 ed to improvement of pregnancy chances during fertility treatment.

## 18 90 **Methods**

20  
21 91 The present study was conducted in accordance with the guidelines of the preferred reporting items  
22  
23 92 for systematic reviews and meta-analysis (PRISMA) recommendations.<sup>34,35</sup> An *a priori* designed  
24  
25 93 study protocol guided the literature search, study selection and data synthesis.

### 28 94 **Search strategy and criteria**

30  
31 95 A comprehensive and systematic search of the literature published between 1978 (first baby born  
32  
33 96 after in vitro fertilization) and April 2014 was conducted, using a sensitive search strategy recom-  
34  
35 97 mended for reviews by Higgins and Green.<sup>36</sup> When conducting the searches, we combined key-  
36  
37 98 words from the two primary concepts, infertility and psychosocial treatment: (i) “infertil\*”, “child-  
38  
39 99 lessness”, “IVF”, “ICSI”, “fertility treatment/problems” “assisted reproduction” and (ii) “psycho-  
40  
41 100 logical/psychosocial intervention”, “social support”, “couples therapy”, “psycho-education”, “inter-  
42  
43 101 net-based intervention” and “behavioral therapy” (for a full search history, see appendix 1). We  
44  
45 102 identified relevant records by electronic searches in general medical and psychological databases:  
46  
47 103 PubMed, PsycINFO, The Cochrane Library, Embase, CINAHL, and Web of Science. Furthermore,  
48  
49 104 we cross-examined reference lists of the retrieved papers and reviews for additional relevant stud-  
50  
51 105 ies. We did not pursue the grey literature or trial registries, and limited our search to include only  
52  
53 106 peer-reviewed articles published in English.

1  
2  
3 107 **Study selection**  
4

5 108 Studies were considered eligible if they 1) reported data on infertile participants 2) presented data  
6  
7 109 on a psychosocial intervention or a supportive program 3) included both baseline and post-  
8  
9 110 intervention measures of stress, distress or pregnancy outcome 4) used a quantitative research ap-  
10  
11 111 proach. In general terms, infertility refers to not being able to conceive for more than one year  
12  
13 112 without contraception (WHO, 2002). Despite this standard definition, a recent review has found  
14  
15 113 considerable between-study variation in definitions.<sup>37</sup> Furthermore, infertility can be graded in rela-  
16  
17 114 tion to clinical diagnosis and duration. This present meta-analysis includes studies using various  
18  
19 115 definitions of the term “infertile”, i.e. all studies including patients diagnosed with infertility, but in  
20  
21 116 different types and stages of ART treatments, such as intrauterine insemination, in vitro fertilization  
22  
23 117 and intracytoplasmic sperm injection, as well as in different cycles. “Psychosocial interventions or  
24  
25 118 supportive programs” were defined as all interventions with a psychosocial aim that did not include  
26  
27 119 the prescription of medication nor had a primary physical focus, e.g. acupuncture or massage thera-  
28  
29 120 py. However, studies using e.g. relaxation, guided imagery or meditation exercises as part of a psy-  
30  
31 121 chosocial program were included. The interventions could be delivered in individual-, group-, cou-  
32  
33 122 ples-, or internet-based format and did not need to involve face-to-face interaction. We included  
34  
35 123 both controlled and uncontrolled trial studies, but chose to exclude expert opinion, magazines,  
36  
37 124 commentaries, case reports, editorials, newspaper articles, newsletters, and books chapters. Neither  
38  
39 125 did we include abstracts-only or conference posters. Our primary outcome was pregnancy rate, de-  
40  
41 126 fined as *clinical pregnancy*. This clinical definition implies a visualization of at least one gestational  
42  
43 127 sack and fetal heartbeat in approximately the 5<sup>th</sup> week after fertilization. Secondary outcome  
44  
45 128 measures were psychological ratings of depressive symptoms, anxiety, generalized stress, specific  
46  
47 129 infertility stress, and interpersonal functioning assessed through self-reported questionnaires.  
48  
49  
50  
51  
52  
53  
54  
55  
56  
57  
58  
59  
60

### 130 **Data extraction and quality assessment**

131 All full-text articles were read by two independent review authors (IFV, NGS) and data extracted  
132 according to predefined criteria. Disagreements were discussed with a third author (YF) and re-  
133 solved by consensus. If specification of any outcome was missing or if clarifications were needed,  
134 authors were contacted for further information. Each study was assessed for methodological quality  
135 using the Jadad criteria,<sup>38</sup> a tool to evaluate methodological quality, e.g. use and adequate descrip-  
136 tion of randomization- and blinding procedures, and description of drop-out rates (score range: 0-5).  
137 In addition to the 0-5 points possible on the original Jadad scale, one additional point was given for  
138 each of the following: (a) was a control group included (b) were both pre- and post-data presented  
139 (c) was any form of blinding of patients, or (d) researchers attempted, (e) was standardized and reli-  
140 able outcome measure used, and (g) were the pre-post correlations provided. The modified scale  
141 yielded a total quality score ranging from 0-12. With respect to the modified Jadad score, the mean  
142 score difference (Rater 1 and 2 means (SD): 5.2 (1.8) and 5.6 (2.0)) did not reach statistical signifi-  
143 cance ( $t(77) = 1.1$ ;  $p = 0.28$ ), and the inter-rater score correlation was  $r = 0.83$  ( $p < 0.001$ ). Kappa  
144 statistic was not used, as this assumes the nominal data and no natural ordering of ratings. Quality  
145 ratings were not used as weights when calculating aggregated effect sizes (ES) as this is generally  
146 discouraged.<sup>39</sup> Instead, associations between ESs and study quality indicators were explored with  
147 meta-ANOVAs (design) and meta-regression (modified Jadad-score). In cases where we were una-  
148 ble to retrieve articles from the authorized databases, authors were contacted between 1-3 times in  
149 order to amend the data collected.

### 150 **Calculating effect sizes**

151 The effect sizes used were the risk ratio (RR) for pregnancy and Hedges  $g$  for psychological out-  
152 comes. Hedges'  $g$  is a variation of Cohen's  $d$  which enables correction of potential bias due to small  
153 sample size.<sup>40,41</sup> A positive Hedges'  $g$  indicates result in the expected direction, e.g. a reduction in  
154 distress in the intervention group compared to controls. A  $RR > 1.0$  indicates a greater proportion of



1  
2  
3 155 pregnancies in the intervention group. RRs were based on pregnancy rates and total N in the inter-  
4  
5 156 vention and control groups ( $k=10$ ) ( $k$  = number of studies). When possible, Hedges'  $g$  was calculat-  
6  
7 157 ed on the basis of reported means and SDs at pre and post-intervention or means and SDs of change  
8  
9 158 scores. This was possible for 50 of 61 effect sizes. When required and available, the reported pre-  
10  
11 159 post correlations were used in the calculation. This was the case for 5 ES's. When unavailable, the  
12  
13 160 pre-post correlation was set to 0.50. When SD's were unavailable, two approaches were used. For  
14  
15 161 STAI state anxiety scores, the average pre- and post SD (10.9 and 10.8) for the studies which re-  
16  
17 162 ported the SD was used, as the SD's appeared to be highly comparable across the remaining studies.  
18  
19 163 For other measures, ES's were estimated either on the basis of sample size and either  $p$ -value or Eta  
20  
21 164 square. In one study reporting only medians,<sup>42</sup> the means and SD's were estimated following a pre-  
22  
23 165 viously suggested approach.<sup>43</sup>

## 27 28 166 **Heterogeneity**

29  
30 167 Heterogeneity was assessed using  $Q$  and  $I^2$  statistics. Heterogeneity tests are aimed at determining  
31  
32 168 whether results reflect genuine between-study differences (heterogeneity), or whether the variation  
33  
34 169 is due to chance (homogeneity).<sup>44,45</sup> In accordance with recommendations, a  $p$ -value  $\leq 0.10$  was  
35  
36 170 used to determine significant heterogeneity due to the general low statistical power of heterogeneity  
37  
38 171 tests.<sup>46</sup> The  $I^2$  quantity provides a measure of the degree of inconsistency by estimating the amount  
39  
40 172 of variance in a pooled ES that can be accounted for by heterogeneity in the sample of studies.<sup>47</sup>  $I^2$   
41  
42 173 values of 0%, 25%, 50%, and 75% indicate no, low, moderate, and high heterogeneity, respectively.

## 45 46 174 **Analytical strategy**

47  
48 175 All ESs were weighted with the inverse variance and combined with a random effects model. First,  
49  
50 176 the overall ES of the effect of psychosocial interventions on pregnancy rates was calculated. Then  
51  
52 177 the overall ES for the combined psychological outcomes was calculated together with the overall  
53  
54 178 ESs for the individual outcome measures of depression, state anxiety, infertility-related distress, and  
55  
56 179 marital function. This was done for the combined sample (women + men). If the results indicated

1  
2  
3 180 study heterogeneity, and if the number of studies in each category was sufficient ( $K \geq 3$ ), possible  
4  
5 181 between-study differences in ESs were explored by comparing the ESs of studies according to the  
6  
7 182 following study characteristics: gender, study design, intervention type, and intervention format  
8  
9 183 (mixed effect meta-ANOVAs), methodological quality (Jadad score), mean age of the sample, in-  
10  
11 184 tervention duration, and number of sessions (mixed effect meta-regression).

14  
15 185 Prior to the search, statistical power analyses were conducted as recommended.<sup>48</sup> Based on the find-  
16  
17 186 ings of the earlier meta-analysis,<sup>32</sup> we assumed to find a RR of 1.4 for pregnancy rates and an aver-  
18  
19 187 age sample size of  $N=76$ . We expected to be able to detect a similar small ES (Hedges  $g = 0.28$  or  
20  
21 188  $RR = 1.4$ ) with an alpha of 5% and a statistical power of 80%, with a total of only 9 studies, using a  
22  
23 189 random-effects model. Based on these results, we considered it worthwhile to conduct the meta-  
24  
25 190 analysis. The calculations were conducted using Comprehensive Meta-Analysis, Version 2  
26  
27 191 (www.meta-analysis.com), SPSS-20, and various formulas in Excel.

### 31 192 **Publication bias**

32  
33 193 The possibility of publication bias, a widespread problem when conducting meta-analyses, was  
34  
35 194 evaluated with funnel plots,<sup>49</sup> Egger's method, and by calculating fail-safe numbers.<sup>50,51</sup> A funnel  
36  
37 195 plot is a graphic illustration of study ESs in relation to study size or precision. Egger's test provides  
38  
39 196 a statistic for the skewness of results.<sup>52</sup> Calculation of fail-safe numbers is aimed at achieving an  
40  
41 197 indication of the number of unpublished studies with null-findings that would reduce the result to  
42  
43 198 statistical non-significance ( $p > 0.05$ ). It has been suggested that a reasonable level is achieved if the  
44  
45 199 fail-safe number exceeds  $5K+10$  ( $K = N$  studies in the meta-analysis).<sup>53</sup> If the results were sugges-  
46  
47 200 tive of publication bias, an adjusted ES was calculated using Duval and Tweedie's trim and fill  
48  
49 201 method,<sup>54</sup> which imputes ESs of missing studies and recalculates the ES accordingly.

## 202 Results

### 203 Study selection

204 In a first screening, duplicates were identified, and titles and abstracts reviewed. A total of 157 stud-  
205 ies were found potentially relevant and reviewed independently by two raters. Four articles could  
206 not be retrieved due to “no access” policy from the university, and the authors did not respond to  
207 our enquiries.<sup>55-58</sup> Initially, the raters were uncertain or disagreed on 13 (8.3%) articles (inter-rater  
208 agreement: 0.78;  $p < 0.001$  (Kappa statistic)) indicating “substantial agreement.”<sup>59</sup> After negotiation,  
209 5 of these were included, resulting in 41 potentially eligible articles. One additional study was ex-  
210 cluded due to the combination of psychological intervention with a psychoactive drug, and one  
211 study had insufficient statistical data and the authors did not respond to our enquiry. We thus in-  
212 cluded a total of 39 studies in the present review. On three occasions authors provided unpublished  
213 additional data.<sup>60-62</sup> Figure 1 shows a flow chart of the study selection process.

214 (Insert Figure 1 near here)

### 215 Study characteristics

216 Based on outcome, 29 of the studies were aimed at reducing negative emotional distress,<sup>60-87</sup> with  
217 the targeted outcomes being: infertility-related distress ( $k=10$ ), depression ( $k=21$ ), anxiety ( $k=25$ ),  
218 and marital function ( $k=5$ ). Five studies focused solely on the outcome of pregnancy,<sup>88-92</sup> and 5  
219 studies had included distress as well as pregnancy as outcome.<sup>93-97</sup> Twenty studies were randomized  
220 controlled trials,<sup>63,71,72,74,76,78,86,91,94,96,98-107</sup> eleven studies included control groups,<sup>42,62,70,88-90,108-111</sup>  
221 with most control groups receiving standardized care or being waiting-list controls. Only three stud-  
222 ies had included an active/attention control condition, e.g. non-emotional writing or receiving an  
223 information booklet.<sup>78,79,107</sup> One study offered gift certificates to the control group participants if  
224 they responded to the follow-up questionnaires.<sup>91</sup> Relatively few studies were uncontrolled ( $k=$   
225 8).<sup>64-66,83,87,112-114</sup> The reporting of the participants’ medical treatment status was inconsistent. Seven

1  
2  
3 226 studies did not provide information on treatment status (whether or not in current ART treatment), 5  
4  
5 227 studies reported that some of the participants were in treatment, but not how many of them, and 27  
6  
7 228 studies reported that their participants were currently in ART treatment. Twenty-five studies had  
8  
9 229 included only women, while the remaining 14 studies had included both women and men. The in-  
10  
11 230 cluded studies had reported data for a total of 3401 participants (3064 women and 347 men). The  
12  
13 231 mean age and mean duration of infertility for intervention group participants was (32.7 yrs. SD 2.2)  
14  
15 232 and (4.6 yrs. SD 2.1) and for control group participants (32.6 yrs. SD=1.7) and (5.1 yrs. SD=3.0).  
16  
17 233 The intervention strategies mostly employed were cognitive behavioral therapy (k=9), supportive  
18  
19 234 psycho-education (k=8), mind/body intervention (k=7), stress management (k=5), and general  
20  
21 235 counselling (k=8). The number of sessions ranged from 1 to 24, lasting approximately from 20  
22  
23 236 minutes to 3 hours and the duration of psychosocial intervention ranged from 1 week to 28 months.  
24  
25 237 The study characteristics are summarized in Table 1.  
26  
27  
28  
29  
30  
31  
32  
33  
34  
35  
36  
37  
38  
39  
40  
41  
42  
43  
44  
45  
46  
47  
48  
49  
50  
51  
52  
53  
54  
55  
56  
57  
58  
59  
60

Table 1

General characteristics of included studies

| Author                      | Country     | Participants (N)<br>I: Intervention<br>C: Control assigned<br>(final analysis)<br>(men %) | Study design <sup>a</sup> | Intervention category <sup>b</sup> | Intervention format<br>(Group, Couples, Individual or Online) | Number of sessions | Intervention duration<br>(weeks) | Outcome: Psychological <sup>c</sup><br>IS: Infertility stress<br>A: Anxiety<br>D: Depression<br>MF: Marital function | Outcome: Pregnancy <sup>d</sup><br>(+/-) | Quality score <sup>e</sup><br>J: Jadad 0-5<br>MJ: Modified Jadad 0-12<br>J (MJ) |
|-----------------------------|-------------|-------------------------------------------------------------------------------------------|---------------------------|------------------------------------|---------------------------------------------------------------|--------------------|----------------------------------|----------------------------------------------------------------------------------------------------------------------|------------------------------------------|---------------------------------------------------------------------------------|
| O'Moore et al. 1983         | Ireland, UK | I: 30 (22) (50 %)<br>C: 20 (20) (50 %)                                                    | NRCT                      | MBI                                | Group                                                         | 8                  | 8                                | D: BDI<br>A: STAI                                                                                                    | -                                        | 1 (4)                                                                           |
| Lukse 1985                  | USA         | I: 29 (29 (14))                                                                           | UCT                       | CSG                                | Group                                                         | 6                  | 6                                | D: DES                                                                                                               | -                                        | 0 (3)                                                                           |
| Sarrel and DeCherney 1985   | USA         | I: 20 (10)<br>C: 20 (9)                                                                   | NRCT                      | CSG                                | Couples                                                       | 1                  | 1                                |                                                                                                                      | +                                        | 0 (1)                                                                           |
| Domar et al. 1990           | USA         | I: 54 (54)                                                                                | UCT                       | MBI                                | Group                                                         | 10                 | 10                               | A: STAI                                                                                                              | -                                        | 0 (3)                                                                           |
| Domar et al. 1992           | USA         | I: 52 (41)                                                                                | UCT                       | MBI                                | Group                                                         | 10                 | 10                               | A: STAI                                                                                                              | -                                        | 1 (3)                                                                           |
| Galletly et al. 1996        | Australia   | I: 37 (37)                                                                                | UCT                       | CSG                                | Group                                                         | 24                 | 24                               | D: HADS<br>A: HADS                                                                                                   | -                                        | 1 (3)                                                                           |
| McQueeney et al. 1997       | USA         | I: 20 (20)<br>C: 9 (9)                                                                    | NRCT                      | CSG                                | Group                                                         | 6                  | 6                                | IS: ISD<br>D: BDI                                                                                                    | -                                        | 3 (7)                                                                           |
| Tuschen-Caffier et al. 1999 | Germany     | I: 34 (22)<br>C: 24 (24)                                                                  | NRCT                      | CBT                                | Couples                                                       | 10-12              | 32                               | IS: one question<br>MF: one question                                                                                 | -                                        | 1 (4)                                                                           |
| Domar et al. 2000           | USA         | I: 56 (20)<br>C: 63 (14)                                                                  | RCT                       | CBT                                | Group                                                         | 10                 | 10                               | D: BDI<br>A: STAI                                                                                                    | +                                        | 4 (10)                                                                          |



|    |                          |     |        |                  |              |         |     |            |             |    |  |            |   |       |  |  |  |  |  |
|----|--------------------------|-----|--------|------------------|--------------|---------|-----|------------|-------------|----|--|------------|---|-------|--|--|--|--|--|
| 1  |                          |     |        |                  |              |         |     |            |             |    |  |            |   |       |  |  |  |  |  |
| 2  |                          |     |        |                  |              |         |     |            |             |    |  |            |   |       |  |  |  |  |  |
| 3  |                          |     |        |                  |              |         |     |            |             |    |  |            |   |       |  |  |  |  |  |
| 4  | Faramarzi                | et  | al.    | Iran             | I: 42 (29)   | RCT     | CBT | Group      | 10          | 10 |  | D: BDI     | - | 3 (6) |  |  |  |  |  |
| 5  | 2008                     |     |        |                  | C: 40 (30)   |         |     |            |             |    |  | A: Cattell |   |       |  |  |  |  |  |
| 6  | Lancastle                | and | Boivin | Wales, UK        | XXX          | RCT/UCT | CSG | Individual | 14          | 2  |  | IS: CIQ    | - | 4 (8) |  |  |  |  |  |
| 7  | 2008                     |     |        |                  |              |         |     |            |             |    |  |            |   |       |  |  |  |  |  |
| 8  | Noorbala                 | et  | al.    | Iran             | I: 288 (288) | UCT     | CBT | Group      |             | 24 |  | D: BDI     | - | 3 (8) |  |  |  |  |  |
| 9  | 2008                     |     |        |                  | (50 %)       |         |     |            |             |    |  |            |   |       |  |  |  |  |  |
| 10 | Mori                     |     |        | Japan            | I: 85 (85)   | RCT     | CSG | Individual | 3           | 12 |  | D: HADS    | - | 4 (8) |  |  |  |  |  |
| 11 | 2009                     |     |        |                  | C: 40 (40)   |         |     |            |             |    |  | A: HADS    |   |       |  |  |  |  |  |
| 12 | Panagopoulou             | et  | al.    | England, UK      | I: 50 (50)   | RCT     | CSG | Individual | 3           | 1  |  | IS: ISS    | - | 3 (7) |  |  |  |  |  |
| 13 | 2009                     |     |        |                  | C: 98 (98)   |         |     |            |             |    |  | A: STAI    |   |       |  |  |  |  |  |
| 14 | Haemmerli                | et  | al.    | Switzerland      | I: 60 (46)   | RCT     | CSG | Online     | 13          | 8  |  | IS: IDS    | - | 3 (6) |  |  |  |  |  |
| 15 | 2010                     |     |        |                  | C: 64 (41)   |         |     |            |             |    |  | D: CES-D   |   |       |  |  |  |  |  |
| 16 |                          |     |        |                  |              |         |     |            |             |    |  | A: STAI    |   |       |  |  |  |  |  |
| 17 | Sexton                   | et  | al.    | USA              | I: 21 (15)   | RCT     | CSG | Individual |             | 2  |  | IS: FPI    | - | 3 (6) |  |  |  |  |  |
| 18 | 2010                     |     |        |                  | C: 22 (16)   |         |     |            |             |    |  |            |   |       |  |  |  |  |  |
| 19 | Domar                    | et  | al.    | USA              | I: 46 (46)   | RCT     | MBI | Group      | 10          | 10 |  |            | + | 4 (6) |  |  |  |  |  |
| 20 | 2011                     |     |        |                  | C: 51(51)    |         |     |            |             |    |  |            |   |       |  |  |  |  |  |
| 21 | Hughes and Mann de Silva |     |        | Canada           | I: 21 (21)   | UCT     | CSG | Group      | 8 (2hrs)    | 8  |  | D: BDI     | - | 0 (2) |  |  |  |  |  |
| 22 | 2011                     |     |        |                  |              |         |     |            |             |    |  | A: BAI     |   |       |  |  |  |  |  |
| 23 | Chan                     | et  | al.    | Hong Kong, China | I: 141 (141) | RCT     | MBI | Group      | 4 (3hrs)    | 4  |  | A: STAI    | + | 3 (6) |  |  |  |  |  |
| 24 | 2012                     |     |        |                  | C: 110 (110) |         |     |            |             |    |  | MF: C-KMS  |   |       |  |  |  |  |  |
| 25 | Gorayeb                  | et  | al.    | Brazil           | I: 93 (93)   | NRCT    | CBT | Group      | 5 (2hrs)    | 5  |  |            | + | 1 (4) |  |  |  |  |  |
| 26 | 2012                     |     |        |                  | C: 95 (95)   |         |     |            |             |    |  |            |   |       |  |  |  |  |  |
| 27 | Koszycki                 | et  | al.    | Canada           | I: 31 (23)   | UCT     | CSG | Individual | 12 (50min)  | 12 |  | IS: FPI    | - | 3 (7) |  |  |  |  |  |
| 28 | 2012                     |     |        |                  |              |         |     |            |             |    |  | D: BDI     |   |       |  |  |  |  |  |
| 29 |                          |     |        |                  |              |         |     |            |             |    |  | HAM-D      |   |       |  |  |  |  |  |
| 30 | Matthiesen               | et  | al.    | Denmark          | I: 42 (15)   | RCT     | CSG | Individual | 3 (20min)   | 1  |  | IS: COMPI  | - | 4 (8) |  |  |  |  |  |
| 31 | 2012                     |     |        |                  | C: 40 (16)   |         |     |            |             |    |  |            |   |       |  |  |  |  |  |
| 32 | Mosalanejad              | et  | al.    | Iran             | I: 32 (32)   | RCT     | CBT | Group      | 12 (2hrs)   | 12 |  | D: DASS    | - | 1 (4) |  |  |  |  |  |
| 33 | 2012                     |     |        |                  | C: 33 (33)   |         |     |            |             |    |  | A: DASS    |   |       |  |  |  |  |  |
| 34 | Mosalanejad              | et  | al.    | Iran             | I: 16 (16)   | NRCT    | CBT | Group      | 15 (1,5hrs) | 16 |  | D: DASS    | - | 2 (5) |  |  |  |  |  |
| 35 | 2012b                    |     |        |                  | C: 15 (15)   |         |     |            |             |    |  | A: DASS    |   |       |  |  |  |  |  |
| 36 | Catoire                  | et  | al.    | France           | I: 50 (50)   | UCT     | MBI | Individual | 4           | 1  |  | A: STAI    | - | 4 (7) |  |  |  |  |  |
| 37 | 2013                     |     |        |                  |              |         |     |            |             |    |  |            |   |       |  |  |  |  |  |

|                  |        |          |                                                |      |     |       |            |    |                      |              |       |
|------------------|--------|----------|------------------------------------------------|------|-----|-------|------------|----|----------------------|--------------|-------|
| Galhardo<br>2013 | et al. | Portugal | I: 55 (55)<br>C: 37 (37)                       | NRCT | MBI | Group | 10 (2hrs)  | 10 | IS:<br>D:<br>A: STAI | ISE -<br>BDI | 1 (4) |
| Vizheh<br>2013   | et al. | Iran     | I: 86 (86)<br>(50 %)<br>C: 94 (86)<br>(54.7 %) | RCT  | CSG | Group | 3 (1.5hrs) | 3  | MF: MSQ              | +            | 4 (8) |

- a) *RCT* Randomized controlled trial, *NRCT* non-randomized controlled trial, *UCT* uncontrolled pre-post trial, *NR* Not reported.
- b) Intervention type: *MIB* Mind/body intervention: mindfulness, yoga, relaxation, imagery, hypnosis etc., *CBT* Cognitive behavioral therapy, *CSG* Counselling: psycho-education, supportive therapy, expressive writing intervention, brief therapy, emotion and problem focused therapy, and narrative therapy.
- c) Outcome measures: **Infertility stress:** COMPI the Copenhagen Multi-centre Psychosocial Infertility Problem Stress scale, FPI Fertility Problem Index, *ISE* Infertility Self-efficacy Scale, *CIQ* the Coping with Infertility Questionnaire, *ISS* the Infertility and Strain Scale, *IDS* Infertility Distress Scale **Depression:** *BDI* the Beck Depression Inventory, *HADS* the Hospital Anxiety and Depression Scale, *CES-D* the Center for Epidemiologic Studies Depression – short version, *SDS* Zung’s Self-administered Depression Scale, *DASS* the Depression and Anxiety Stress Scale - depression **Anxiety:** *STAI* Spielberger State-Trait Anxiety Inventory, *BAI* the Beck Anxiety Inventory, *HAM-D* Hamilton Depression Rating Scale – subscale anxiety, *DASS* the Depression and Anxiety Stress Scale – anxiety, *Cattell* Cattell Anxiety Inventory **Marital function:** *C-KMS* Kansas Marital Satisfaction Scale – Chinese version *RDAS* Revised Dyadic Adjustment Scale – dyadic cohesion subscale, *MSQ* Marital Satisfaction Questionnaire.
- d) *Pregnancy* is defined as a clinical pregnancy; when heartbeat of the fetal sac is evident in the uterus with an ultrasound scan .
- e) *Jadad range 0-5* an assessment tool rating the quality and methodology of the studies included<sup>1</sup> and the *modified Jadad range 0-12(total score)* included additional points for: inclusion of a control group, pre-post data, blinding of participants or researchers, use of standardized and reliable outcome measures and report of pre-post correlations.



1  
2  
3 253 **Effects of psychosocial intervention**  
4

5  
6 254 The results of the meta-analyses are summarized in Table 2.  
7

8 255  
9  
10  
11  
12  
13  
14  
15  
16  
17  
18  
19  
20  
21  
22  
23  
24  
25  
26  
27  
28  
29  
30  
31  
32  
33  
34  
35  
36  
37  
38  
39  
40  
41  
42  
43  
44  
45  
46  
47  
48  
49  
50  
51  
52  
53  
54  
55  
56  
57  
58  
59  
60

For peer review only

**Table 2**

Results of meta-analyses of effects of psychosocial intervention on psychological outcomes and pregnancy rates among infertile couples

|                                            | Sample size       |      | Heterogeneity <sup>a</sup> |    |        |                | Global effect sizes   |              |        | Failsafe N <sup>c</sup> | Criterion <sup>d</sup> |
|--------------------------------------------|-------------------|------|----------------------------|----|--------|----------------|-----------------------|--------------|--------|-------------------------|------------------------|
|                                            | K                 | N    | Q                          | df | p      | I <sup>2</sup> | Hedges g <sup>b</sup> | 95 % CI      | p      |                         |                        |
| <b>MAIN EFFECTS</b>                        |                   |      |                            |    |        |                |                       |              |        |                         |                        |
| Pregnancy                                  |                   |      |                            |    |        |                |                       |              |        |                         |                        |
| Pregnancy, women                           | 10                | 1194 | 22.0                       | 9  | =0.009 | 59.0           | 2.01 (RR)             | 1.48 – 2.73  | <0.001 | 130                     | 60                     |
| <i>Adjusted for publication bias</i>       | (13)              | -    | -                          | -  | -      | -              | 1.57 (RR)             | 1.10 – 2.25  | <0.05  | -                       | -                      |
| Psych. combined, women+men                 | 35                | 2746 | 259.2                      | 34 | <0.001 | 86.9           | 0.59                  | 0.38 – 0.80  | <0.001 | 1552                    | 185                    |
| <i>Adjusted for publication bias</i>       | (42) <sup>e</sup> | -    | -                          | -  | -      | -              | 0.31                  | 0.07 – 0.56  | <0.05  | -                       | -                      |
| Psych. combined, women                     | 28                | 2076 | 130.8                      | 27 | <0.001 | 76.4           | 0.51                  | 0.32 – 0.70  | <0.001 | 798                     | 150                    |
| <i>Adjusted for publication bias</i>       | (34) <sup>e</sup> | -    | -                          | -  | -      | -              | 0.30                  | 0.09 – 0.51  | <0.05  | -                       | -                      |
| Psych. combined, men                       | 7                 | 347  | 8.9                        | 6  | =0.178 | 32.8           | 0.34                  | 0.08 – 0.59  | =0.010 | 12                      | 45                     |
| Between-group <sup>f</sup> (women vs. men) | 35                | 2110 | 1.2                        | 1  | ns     | -              | -                     | -            | -      | -                       | -                      |
| Infertility distress                       |                   |      |                            |    |        |                |                       |              |        |                         |                        |
| Infertility distress, women+men            | 10                | 615  | 21.4                       | 9  | =0.01  | 58.0           | 0.24                  | -0.02 – 0.50 | ns     | -                       | -                      |
| Infertility distress, women                | 6                 | 371  | 17.8                       | 5  | =0.003 | 71.8           | 0.37                  | -0.06 – 0.79 | ns     | -                       | -                      |
| Depressive symptoms                        |                   |      |                            |    |        |                |                       |              |        |                         |                        |
| Depression symp., women+men                | 21                | 1558 | 367.5                      | 20 | <0.001 | 94.6           | 1.00                  | 0.54 – 1.45  | <0.001 | 1022                    | 115                    |
| <i>Adjusted for publication bias</i>       | (25) <sup>e</sup> | -    | -                          | -  | -      | -              | 0.31                  | -0.20 – 0.84 | ns     | -                       | -                      |
| Depressive symp., women                    | 17                | 992  | 107.7                      | 16 | <0.001 | 85.1           | 0.73                  | 0.41 – 1.06  | <0.001 | 393                     | 95                     |
| <i>Adjusted for publication bias</i>       | (23) <sup>e</sup> | -    | -                          | -  | -      | -              | 0.29                  | -0.07 – 0.65 | ns     | -                       | -                      |
| Depressive symp., men                      | 5                 | 243  | 1.9                        | 4  | =0.749 | 0.00           | 0.13                  | -0.11 – 0.37 | ns     | -                       | -                      |
| Between-group <sup>f</sup> (women vs. men) | 22                | 1235 | 8.5                        | 1  | <0.004 | -              | -                     | -            | -      | -                       | -                      |
| Anxiety                                    |                   |      |                            |    |        |                |                       |              |        |                         |                        |

|    |                                                    |                   |      |       |    |        |      |           |              |         |     |     |
|----|----------------------------------------------------|-------------------|------|-------|----|--------|------|-----------|--------------|---------|-----|-----|
| 1  |                                                    |                   |      |       |    |        |      |           |              |         |     |     |
| 2  |                                                    |                   |      |       |    |        |      |           |              |         |     |     |
| 3  |                                                    |                   |      |       |    |        |      |           |              |         |     |     |
| 4  | Anxiety, women+men                                 | 25                | 2159 | 144.4 | 24 | <0.001 | 83.4 | 0.51      | 0.31 – 0.71  | <0.001  | 760 | 135 |
| 5  | <i>Adjusted for publication bias</i>               | (29) <sup>e</sup> | -    | -     | -  | -      | -    | 0.31      | 0.07 – 0.54  | <0.05   | -   | -   |
| 6  | Anxiety, women                                     | 23                | 1737 | 114.3 | 22 | <0.001 | 80.8 | 0.53      | 0.32 – 0.73  | <0.001  | 631 | 125 |
| 7  | <i>Adjusted for publication bias</i>               | (27) <sup>e</sup> | -    | -     | -  | -      | -    | 0.32      | 0.08 – 0.57  | <0.05   | -   | -   |
| 8  | Anxiety, men                                       | 5                 | 246  | 8.7   | 4  | =0.070 | 53.8 | 0.32      | -0.04 – 0.67 | ns      | -   | -   |
| 9  | Between-group <sup>f</sup> (women vs. men)         | 28                | 1983 | 1.0   | 1  | ns     | -    | -         | -            | -       | -   | -   |
| 10 | Marital function                                   |                   |      |       |    |        |      |           |              |         |     |     |
| 11 | Marital function, women+men                        | 5                 | 633  | 14.6  | 4  | =0.006 | 72.6 | 0.09      | -0.23 – 0.41 | ns      | -   | -   |
| 12 | Marital function, women                            | 4                 | 587  | 14.5  | 3  | =0.002 | 79.3 | 0.08      | -0.30 – 0.46 | ns      | -   | -   |
| 13 | <b>MODERATOR ANALYSES</b>                          |                   |      |       |    |        |      |           |              |         |     |     |
| 14 | <b>Pregnancy (women)</b>                           |                   |      |       |    |        |      |           |              |         |     |     |
| 15 | <b>Study design<sup>h</sup></b>                    |                   |      |       |    |        |      |           |              |         |     |     |
| 16 | RCT                                                | 5                 | 668  | 11.5  | 4  | =0.066 | 62.1 | 1.70 (RR) | 1.06 – 2.72  | < 0.05  | 12  | 35  |
| 17 | NRCT                                               | 5                 | 656  | 8.1   | 4  | =0.032 | 54.7 | 2.37 (RR) | 1.57 – 3.60  | < 0.001 | 46  | 35  |
| 18 | Between group <sup>f</sup>                         | 10                | 1324 | 1.1   | 1  | ns     | -    | -         | -            | -       | -   | -   |
| 19 | <b>Intervention format</b>                         |                   |      |       |    |        |      |           |              |         |     |     |
| 20 | Group                                              | 5                 | 691  | 10.9  | 4  | =0.027 | 63.4 | 2.03 (RR) | 1.29 – 3.20  | < 0.01  | 28  | 35  |
| 21 | Individual                                         | 4                 | 433  | 2.2   | 3  | =0.531 | 0.0  | 1.65 (RR) | 1.26 – 2.17  | < 0.001 | 8   | 30  |
| 22 | Between group <sup>f</sup>                         | 9                 | 1124 | 0.5   | 1  | ns     | -    | -         | -            | -       | -   | -   |
| 23 | <b>Psychological outcomes combined (women+men)</b> |                   |      |       |    |        |      |           |              |         |     |     |
| 24 | <b>Study design<sup>h</sup></b>                    |                   |      |       |    |        |      |           |              |         |     |     |
| 25 | RCT                                                | 20                | 2185 | 232.4 | 19 | <0.001 | 91.8 | 0.70      | 0.36 – 1.03  | <0.001  | 642 | 110 |
| 26 | <i>Adjusted for publication bias</i>               | (24) <sup>e</sup> | -    | -     | -  | -      | -    | 0.26      | -0.10 – 0.68 | ns      | -   | -   |
| 27 | NRCT                                               | 8                 | 450  | 14.9  | 7  | =0.037 | 53.1 | 0.28      | -0.00 – 0.57 | ns      | -   | -   |
| 28 | UCT                                                | 7                 | 215  | 6.0   | 6  | =0.424 | 0.0  | 0.55      | 0.40 – 0.70  | <0.001  | 90  | 45  |
| 29 | <i>Adjusted for publication bias</i>               | (10) <sup>e</sup> | -    | -     | -  | -      | -    | 0.51      | 0.36 – 0.66  | <0.05   | -   | -   |
| 30 | Between group <sup>f</sup>                         | 35                | 2850 | 3.9   | 2  | ns     | -    | -         | -            | -       | -   | -   |

| <b>Intervention types</b>            |                         |      |       |    |        |      |             |                     |                 |     |     |
|--------------------------------------|-------------------------|------|-------|----|--------|------|-------------|---------------------|-----------------|-----|-----|
| CBT                                  | 8                       | 602  | 67.8  | 7  | <0.001 | 89.7 | 1.15        | 0.53 – 1.78         | <0.001          | 190 | 50  |
| <i>Adjusted for publication bias</i> | <i>(10)<sup>e</sup></i> | -    | -     | -  | -      | -    | <i>0.66</i> | <i>-0.01 – 1.33</i> | <i>ns</i>       | -   | -   |
| MBI                                  | 7                       | 733  | 21.2  | 6  | =0.002 | 71.0 | 0.41        | 0.17 – 0.65         | <0.001          | 76  | 45  |
| <i>Adjusted for publication bias</i> | <i>(8)<sup>e</sup></i>  | -    | -     | -  | -      | -    | <i>0.36</i> | <i>0.11 – 0.62</i>  | <i>&lt;0.05</i> | -   | -   |
| Counselling                          | 10                      | 891  | 121.0 | 9  | <0.001 | 92.6 | 0.45        | -0.11 – 1.00        | ns              | -   | -   |
| Between group <sup>f</sup>           | 25                      | 1624 | 4.4   | 2  | ns     | -    | -           | -                   | -               | -   | -   |
| <b>Intervention format</b>           |                         |      |       |    |        |      |             |                     |                 |     |     |
| Group                                | 20                      | 1484 | 87.2  | 19 | <0.001 | 78.2 | 0.76        | 0.55 – 0.98         | <0.001          | 959 | 110 |
| <i>Adjusted for publication bias</i> | <i>(26)<sup>e</sup></i> | -    | -     | -  | -      | -    | <i>0.50</i> | <i>0.25 – 0.75</i>  | <i>&lt;0.05</i> | -   | -   |
| Individual                           | 9                       | 834  | 17.7  | 8  | =0.023 | 54.9 | 0.13        | -0.08 – 0.35        | ns              | -   | -   |
| Couples                              | 3                       | 284  | 92.3  | 2  | <0.001 | 97.8 | 1.07        | -1.02 – 3.16        | ns              | -   | -   |
| Online                               | 3                       | 248  | 1.2   | 2  | =0.541 | 0.00 | 0.03        | -0.22 – 0.28        | ns              | -   | --  |
| Between group <sup>f</sup>           | 35                      | 2850 | 24.5  | 3  | <0.001 | -    | -           | -                   | -               | -   | -   |

<sup>a)</sup> Q-statistic: *p*-values < 0.1 taken to suggest heterogeneity. I<sup>2</sup> statistic: 0% (no heterogeneity), 25% (low heterogeneity), 50% (moderate heterogeneity), 75% (high heterogeneity).

<sup>b)</sup> ESR = Hedges *g*. Standardized mean difference, adjusting for small sample bias. A positive value indicates an effect size in the hypothesized direction, i.e. reduced pain or relative smaller increased in pain in the intervention group. All ES's were combined using a random effects model. To ensure independency, if a study reported results for more than one pain measure, the ES's were combined (mean), ensuring that only one ES per study was used in the calculation.

<sup>c)</sup> Failsafe N = number of non-significant studies that would bring the *p*-value to non-significant (*p* > 0.05);

<sup>d)</sup> A Failsafe N exceeding the criterion (5 x *k* + 10) indicates a robust result <sup>1</sup>.

<sup>e)</sup> If analyses indicated the possibility of publication bias, missing studies were imputed and an adjusted ESR calculated (*italics*)<sup>RW.ERROR - Unable to find reference:1076</sup>. (*K*) indicates number of published studies + number of imputed studies.

<sup>f)</sup> Meta-ANOVA (between-study comparisons)

<sup>h)</sup> RCT (randomized controlled trial), NRCT (Non-randomized Controlled Trial), UCT (uncontrolled trial (pre-post))

1  
2  
3  
4 266 *Pregnancy rates*

5  
6 267 A statistically significant and robust effect size (RR = 2.01) was found for the 10 studies which had  
7  
8 268 investigated effects of psychosocial intervention on clinical pregnancy rates, with the chance of  
9  
10 269 becoming pregnant being doubled in the intervention group. Adjusting for possible publication bias,  
11  
12 270 the risk ratio was somewhat lower (1.57).

13  
14  
15 271 *Combined psychological outcomes*

16  
17 272 Combining the effect sizes of the 35 studies which had included one or more psychological out-  
18  
19 273 comes revealed a statistically significant, robust<sup>53</sup>, medium<sup>40</sup> effect size ( $g = 0.59$ ). The results indi-  
20  
21 274 cated possible publication bias (skewed funnel plot, Egger's test ( $p < 0.05$ )) in favor of larger pub-  
22  
23 275 lished ESs. When imputing missing ESs,<sup>54</sup> the resulting adjusted pooled ES was smaller (0.31), but  
24  
25 276 remained statistically significant. Taking gender into consideration, the ES (0.51) remained statisti-  
26  
27 277 cally significant for women, still suggesting a robust effect. The ES was smaller for men (0.34) and  
28  
29 278 did not reach statistical significance.

30  
31  
32  
33 279 *Infertility-related distress*

34  
35 280 Only ten studies had included infertility-related distress as an outcome. Small ESs were found for  
36  
37 281 women and men combined (0.24) and women alone (0.37), and did not reach statistical signifi-  
38  
39 282 cance.

40  
41  
42  
43 283 *Depression*

44  
45 284 Twenty-one studies had assessed depressive symptoms. A statistically significant ES (1.00) was  
46  
47 285 found for women and men combined. However, when adjusting for possible publication bias, the  
48  
49 286 results changed dramatically to a small, non-significant ES of 0.31. Similar results were found for  
50  
51 287 women alone with a statistically significant ES of 0.73 reduced to a non-significant 0.29 after ad-  
52  
53 288 justing for possible publication bias. For men alone, the ES (0.13) did not reach statistically signifi-  
54  
55 289 cance.

1  
2  
3 290 *State anxiety*

4  
5 291 Twenty-five studies had included state anxiety as outcome. A statistically significant, robust medi-  
6  
7 um ES (0.51) was found for women and men combined. Adjusting for possible publication bias led  
8  
9 292 to a smaller, but statistically significant, ES (0.31). For women, the ES of 0.53 was statistically sig-  
10  
11 293 nificant, but smaller (0.32) and non-significant when adjusting for publication bias. For men only,  
12  
13 294 the analysis produced a small, non-significant ES of 0.32.  
14  
15

16  
17 296 *Marital function*

18  
19 297 Only 5 studies (N = 633) had included measures of marital function, and only very small (ES: 0.09-  
20  
21 298 0.08) non-significant effects were found.  
22  
23

24  
25 299 **Possible moderators**

26  
27 300 As the  $Q$ -statistics were generally statistically significant ( $p < 0.10$ ) and the  $I^2$ -statistic indicated low  
28  
29 301 to medium heterogeneity, we explored, when a sufficient number of studies were available for each  
30  
31 302 analysis, possible sources of heterogeneity and analyzed whether the ESs for pregnancy and com-  
32  
33 303 bined psychological outcomes varied according to between-study differences in study design and  
34  
35 304 intervention characteristics (type and format). The results are shown in Table 2.  
36  
37

38  
39 305 *Study design*

40  
41 306 The ESs found for pregnancy outcomes were statistically significant for both randomized controlled  
42  
43 307 trials (RCT) (RR=1.7) and non-randomized controlled studies (NRCT) (2.4). The difference did not  
44  
45 308 reach statistical significance. For psychological outcomes, the pooled ES for RCT's ( $g = 0.70$ ) was  
46  
47 309 larger than for both NRCT's (0.28) and uncontrolled trials (UCT) (0.55) and the only statistically  
48  
49 310 significant result. When adjusting for publication bias, the ES for RCTs (0.26) was smaller than for  
50  
51 311 NRCTs and UCTs. Between-group differences did not reach statistical significance.  
52  
53  
54  
55  
56  
57  
58  
59  
60

1  
2  
3 312 *Intervention type*

4  
5 313 The number of studies for each intervention type was insufficient to explore differences in pregnan-  
6  
7 314 cy outcomes. For the combined psychological outcomes, statistically significant effects were found  
8  
9 315 for both cognitive behavioral therapies (CBT) and mind/body interventions (MBI), with the largest  
10  
11 316 ES for CBT ( $g=1.15$ ), followed by MBI (0.41). Counseling did not reach statistical significance.  
12  
13  
14 317 The failsafe numbers exceeded the criterion, indicating rather robust results. The between-group  
15  
16 318 differences did not reach statistical significance.

17  
18  
19 319 *Intervention format*

20  
21 320 For pregnancy outcomes, the number of studies was sufficient for Group and Individual formats.  
22  
23 321 Both formats yielded statistical significant ES's (RR: 2.03 and 1.65), but the between-group differ-  
24  
25 322 ence did not reach statistical significance. For the combined psychological outcomes, a statistically  
26  
27 323 significant effect was found for Group format ( $g= 0.76$ ) ( $p < 0.001$ ). Intervention formats such as  
28  
29 324 Individual, Couples, and Online did not reach statistical significance. The overall between-group  
30  
31 325 difference for intervention formats was statistical significant ( $p < 0.001$ ).  
32  
33

34  
35 326 *Other study characteristics*

36  
37 327 The possible moderating influence of the continuously assessed study characteristics of mean age,  
38  
39 328 intervention duration, number or sessions, and study quality (Jadad scores) were analyzed with me-  
40  
41 329 ta-regression. As seen in Table 3, no significant effects were found for any of the moderators for  
42  
43 330 either pregnancy or the combined psychological outcomes. A total of 6 studies had examined ef-  
44  
45 331 fects on both pregnancy and anxiety. When examining the possible role of anxiety reduction as a  
46  
47 332 mediator of the effect on pregnancy outcome with meta-regression, a statistically significant associ-  
48  
49 333 ation was found between the ESs for anxiety and pregnancy, indicating that the greater the reduc-  
50  
51 334 tion in anxiety, the greater the likelihood of achieving pregnancy (see Table 3).  
52  
53  
54

55  
56 335 **Table 3**

## Results of meta-regression analyses

| Dependent variable | Independent variable                        | K  | Beta <sup>a</sup> | 95% CI        | <i>p</i>     |
|--------------------|---------------------------------------------|----|-------------------|---------------|--------------|
| Pregnancy          | ES- Anxiety                                 | 6  | 0.19              | 0.06 – 0.31   | <b>0.004</b> |
|                    | Mean age                                    | 9  | -0.05             | -0.19 – 0.10  | 0.534        |
|                    | Intervention duration                       | 9  | 0.01              | -0.03 – 0.06  | 0.669        |
|                    | Number of sessions                          | 9  | -0.00             | -0.08 – 1.07  | 0.922        |
|                    | Study quality (Jadad scores) <sup>b</sup>   | 10 | -0.02             | -0.09 – 0.04  | 0.477        |
| Psych.Combined     | Mean age                                    | 32 | -0.05             | -0.12 - -0.02 | 0.214        |
|                    | Intervention duration                       | 32 | 0.01              | -0.02 – 0.04  | 0.518        |
|                    | Number of sessions                          | 27 | 0.03              | -0.01 – 0.07  | 0.150        |
|                    | Study quality (Jadad scores) <sup>b,c</sup> | 35 | -0.02             | -0.06 – 0.02  | 0.415        |

336 <sup>a)</sup> Mixed effects regression: unrestricted maximum likelihood; <sup>b)</sup> Modified Jadad-score; <sup>c)</sup> P-values for individual psy-  
 337 chological outcomes; 0.09 (anxiety) – 0.58 (depression).

## 338 Discussion

### 339 Primary findings

340 Our meta-analysis of the available evidence suggests that women who receive some form of psy-  
 341 chological intervention are approximately twice as likely to become pregnant when compared to  
 342 controls receiving standardized care or active control intervention. Although the results of the 10  
 343 currently available studies appeared robust, there were some indications of publication bias in favor  
 344 of studies with larger positive effect sizes. It should also be noted that the precision of the effect  
 345 size estimate is limited, with possible RR's ranging from approx. 1.5 to 2.7. Although the between-  
 346 group difference did not reach statistical significance, NRCT's yielded greater effects (RR: 2.4 (95  
 347 % CI: 1.57 – 3.60)) than RCT's (RR: 1.7 (95 % CI: 1.06 – 2.72)). Compared with other types of  
 348 interventions that historically have been introduced to improve pregnancy rates in ART (improved  
 349 culture media, new hormone stimulation regimens etc.), even an effect corresponding to the lower  
 350 limit of the confidence interval is substantial. While the results could be considered surprising, we  
 351 have no good reasons to reject this finding, which is further supported by the results of the meta-  
 352 regression showing that larger reductions in anxiety were associated with improved pregnancy out-  
 353 comes. With respect to the psychological outcomes currently reported in the literature, the results



1  
2  
3 354 suggest that psychological intervention could be effective in reducing anxiety (25 studies) as well as  
4  
5 355 depressive symptoms (21 studies) with the effects corresponding to medium and large effect sizes  
6  
7 356 (0.5 and 1.0). As for pregnancy outcomes, there were indications of publication bias in the direction  
8  
9 357 of larger positive effects, and adjusting for publication bias resulted in a considerably smaller statis-  
10  
11 358 tically non-significant effect size for depressive symptoms. The pooled results did not reach statisti-  
12  
13 359 cal significance for the 10 studies which had investigated effects on infertility-related distress and  
14  
15 360 the 5 studies which had included measures of marital function.

### 19 361 **Comparing with results of previous reviews**

20  
21 362 The present review included 39 studies of a total of 3401 women (3064) and men (347). The partic-  
22  
23 363 ipants received various psychosocial interventions lasting from one week to six months, including  
24  
25 364 cognitive behavioral therapy, emotional disclosure, psycho-education, and mind/body interventions.  
26  
27 365 The present review evaluates almost twice the number of studies included in the most recent previ-  
28  
29 366 ous review,<sup>32</sup> which reported mixed results of the efficacy of psychosocial intervention. Whereas  
30  
31 367 the former review found no evidence for attenuating distress, there was promising support of psy-  
32  
33 368 chological intervention increasing pregnancy chances for women not receiving ART.<sup>32</sup> In line with  
34  
35 369 the second review from 2005,<sup>31</sup> we found more credible results for group intervention than for other  
36  
37 370 formats, e.g. online interventions, individual and couples intervention.<sup>115</sup> The first review published  
38  
39 371 in 2003 also highlighted group interventions as more effective, especially if the interventions em-  
40  
41 372 phasized education and skills training, such as relaxation. Our results concurred with those observa-  
42  
43 373 tions, and distinguishing between CBT, MBI, and counseling in general, our findings suggest that  
44  
45 374 interventions delivered in groups may be more effective in reducing distress. The recently conduct-  
46  
47 375 ed studies included in the present review have contributed by increasing the size of the available  
48  
49 376 dataset considerably, and taken together the currently available evidence suggests that offering psy-  
50  
51 377 chosocial interventions may improve both chances of pregnancy and quality-of-life for infertile pa-  
52  
53 378 tients going through fertility treatment.

1  
2  
3 379 **Strengths and limitations**

4  
5 380 Our systematic review and meta-analysis has several strengths. We conducted a comprehensive  
6  
7 381 search and performed the review in accordance with the recommended guidelines.<sup>35</sup> In order to lim-  
8  
9 382 it the possibility of selection bias, we encouraged authors of eligible studies to elaborate on their  
10  
11 383 results if the data reported was insufficient, and asked authors of papers written in foreign language  
12  
13 384 to submit their results to us in English. The included studies represented a range of different coun-  
14  
15 385 tries, has used comparable outcome measures, and provided fairly comprehensive descriptions of  
16  
17 386 the interventions studied. In addition, we conducted a detailed evaluation of the methodological  
18  
19 387 quality, explored heterogeneity, and made adjustments for possible publication bias, when required.  
20  
21 388 Some limitations of the currently available data should also be noted. First, the samples investigated  
22  
23 389 were not as homogeneous as could be wished for. A small number of infertile participants did not  
24  
25 390 receive treatment with ART, and it was not consistently reported what type of ART procedure the  
26  
27 391 participants received and what phase or treatment they were in. Nonetheless, as suggested by the  
28  
29 392 failsafe numbers, the reductions in anxiety and depressive symptoms appeared quite robust. Second-  
30  
31 393 ly, the methodological quality varied considerably across the included studies, which may have  
32  
33 394 weakened the interpretability of the outcomes, as suggested by the greater ESs found for pregnancy  
34  
35 395 outcomes for NRCSs compared with RCTs. On the other hand, we found no statistical significant  
36  
37 396 associations between study quality scores for either pregnancy or psychological outcomes. A third  
38  
39 397 possible limitation is the high level of heterogeneity indicated by Q and I<sup>2</sup> statistics and the pooled  
40  
41 398 effect sizes reported in the present review should thus be viewed as an estimate of the average ex-  
42  
43 399 pected effect across a range of different settings. Fourth, the indications of publication bias for sev-  
44  
45 400 eral results suggest the possibility of a “file drawer problem”, i.e. the existence of relevant un-  
46  
47 401 published null-findings, a common problem when conducting systematic reviews. Finally, due to  
48  
49 402 inconsistencies in the reporting of causes of infertility, we are unable to evaluate the possible asso-  
50  
51 403 ciations between effect sizes and causes of infertility. Although meta-analysis remains the gold  
52  
53  
54  
55  
56  
57  
58  
59  
60

1  
2  
3 404 standard when evaluating the current evidence within a field of research, as is often the case with  
4  
5 405 systematic reviews, qualitative as well as quantitative, the overall level of the evidence reported in  
6  
7 406 our review may be challenged by the heterogeneity and methodological limitations of the existing  
8  
9 407 studies.

### 12 408 **Clinical and practical implications**

14 409 We found evidence for improvement in general psychological symptoms such as anxiety and de-  
15  
16 410 pression, but not for infertility-specific distress. A possible explanation for the latter could be the  
17  
18 411 lack of sensitivity of the infertility-related distress measures used. The questions used in these  
19  
20 412 measures are directly concerned with thoughts and feelings about involuntarily childlessness, and  
21  
22 413 rumination about the involuntary childlessness may persist, even when psychosocial intervention  
23  
24 414 improves general psychological wellbeing. Of special interest is the result of our meta-regression  
25  
26 415 analysis of the six studies which had included both pregnancy and anxiety as outcomes showing  
27  
28 416 that larger reductions in anxiety were associated with greater chances of pregnancy. Anxiety is a  
29  
30 417 state of arousal, which over time is physically and mentally stressful for the individual.<sup>17</sup> Reducing  
31  
32 418 distress, anxiety in particular, may increase the physiological ability to cope with stress and advance  
33  
34 419 the possibility of impregnation. We found no association between mean age and pregnancy rates  
35  
36 420 outcomes, which may seem surprising, since age is the most important predictor of pregnancy out-  
37  
38 421 comes of ART.<sup>116,117</sup> However, our meta-regression was conducted for the mean age of the *sample*  
39  
40 422 and the mean age across study samples only showed little variation (Mean age: 32.7; SD: 2.4). A  
41  
42 423 rather narrow age interval may explain an apparent lack of association between age and chance of  
43  
44 424 pregnancy. Our findings also suggest that group interventions appear to be more efficacious than  
45  
46 425 individual, couples or online interventions. This could be explained by various reasons. Firstly,  
47  
48 426 group interventions had longer duration (mean: 9.5 weeks) and involved more sessions (8.3) than  
49  
50 427 individual interventions (mean: 5.3 and 4.4) and secondly, there is evidence of a positive impact of  
51  
52  
53  
54  
55  
56  
57  
58  
59  
60

1  
2  
3 428 “group settings” i.e. the sense-of-community between participants, reducing the feelings of isolation  
4  
5 429 or alienation and sharing with individuals in the same life situation etc.<sup>118-121</sup>  
6  
7

### 8 430 **Recommendations for future research**

9  
10 431 Despite the overall positive effects of psychosocial interventions, there is generally a need for stud-  
11  
12 432 ies with more rigorous methodology, including more strict reporting of causes of infertility, the  
13  
14 433 types of ART used, and which phases of treatment participants are in. Furthermore, it would be of  
15  
16 434 importance to develop clinically meaningful categories of distress with the purpose of improving  
17  
18 435 interventions targeted to the various types and levels of distress experienced by the participants.  
19  
20 436 Psychological well-being/distress fluctuates over time during fertility treatment and a stepped care  
21  
22 437 approach could be potentially valuable in this population.<sup>122</sup> Also needed are studies testing hypoth-  
23  
24 438 eses concerning possible moderating and mediating mechanisms of the effects if interventions on  
25  
26 439 distress as well as pregnancy outcomes. For example, what psychosocial factors do we need to tar-  
27  
28 440 get to optimize effects on distress and pregnancy rates, and which biomarkers affected by psycho-  
29  
30 441 social interventions, e.g. oxidative stress, inflammatory processes, can best explain the observed  
31  
32 442 effects. This could assist in developing a more solid evidence base providing better guidance for  
33  
34 443 patients, health professionals, and policy makers about “what works for whom” in infertile patients.  
35  
36  
37  
38  
39  
40

### 41 444 **Conclusions**

42  
43 445 In conclusion, the present meta-analysis of 39 studies suggests that psychosocial intervention, in  
44  
45 446 particular CBT and MBI interventions, are beneficial for reducing distress in the form of anxiety  
46  
47 447 and depressive symptoms and for improving pregnancy outcomes of ART. Moreover, there is some  
48  
49 448 preliminary evidence to suggest that reduction in anxiety achieved through psychological interven-  
50  
51 449 tion may improve the chance of pregnancy. Despite the robust overall effect found, the considerable  
52  
53 450 heterogeneity of the available studies with respect to methodological quality, intervention type and  
54  
55 451 format still warrants caution as to the conclusions which can be drawn.  
56  
57  
58  
59  
60

## 452 **Acknowledgements**

453 We would like to thank Gina Bay, Librarian at the Institute Library, Institute of Psychology and  
454 Behavioral Sciences, School of Business and Social Sciences, Aarhus University for valuable and  
455 tireless assistance throughout the database search process. We would also like to give our most  
456 grateful thanks to the researchers who provided us with additional data on their studies or aided us  
457 in other ways.

458 Contributors: RZ and YF designed the protocol. YF developed search strategies and IFV, NGS and  
459 YF performed the searches and study selection. YF and IFV undertook data extraction and quality  
460 assessments. RZ were responsible for analyzing the data. YF drafted the manuscript and IFV, NGS,  
461 HJI and RZ contributed to the manuscript throughout the process. All authors provided input and  
462 were involved with the interpretation of this review. YF is the study guarantor.

463 Funding: This study has not received funding but Y.F. was supported by a research grant from The  
464 Danish Agency for Science Technology and Innovation based on a PhD-fellowship.

465 Competing interests: None declared

466 Ethical approval: None required

467 Data sharing: No additional data available

## 468 **What is already known on this topic**

469 Previous reviews have been inconclusive concerning the efficacy of psychosocial interventions for  
470 reducing distress and improving clinical pregnancy chances.

## 471 **What this study adds**

472 Synthesizing the currently available evidence suggests that psychosocial interventions, in particular  
473 cognitive behavioral therapy (CBT), could provide clinically meaningful benefits for infertile wom-

1  
2  
3 474 en and men. Psychosocial intervention leads to reductions in anxiety and depressive symptoms and  
4  
5 475 larger reductions in anxiety appear to be associated with increased fertility rates for women in  
6  
7 476 treatment for infertility.  
8  
9

10  
11 477 **References**  
12

- 13  
14  
15 478 1. Hart VA. Infertility and the role of psychotherapy. *Issues Ment Health Nurs.* 2002;23(1):31-41.  
16  
17  
18 479 2. Oddens BJ, den Tonkelaar I, Nieuwenhuys H. Psychosocial experiences in women facing fertili-  
19  
20 480 ty problems--a comparative survey. *Hum Reprod.* 1999;14(1):255-261.  
21  
22  
23  
24 481 3. Cwikel J, Gidron Y, Sheiner E. Psychological interactions with infertility among women. *Eur J*  
25  
26 482 *Obstet Gynecol Reprod Biol.* 2004;117(2):126-131.  
27  
28  
29 483 4. Swan SH, Elkin EP, Fenster L. The question of declining sperm density revisited: An analysis of  
30  
31 484 101 studies published 1934-1996. *Environ Health Perspect.* 2000;108(10):961-966.  
32  
33  
34  
35 485 5. Skakkebaek NE, Jorgensen N, Main KM, et al. Is human fecundity declining? *Int J Androl.*  
36  
37 486 2006;29(1):2-11.  
38  
39  
40 487 6. Hammen C. Stress and depression. *Annu Rev Clin Psychol.* 2005;1:293-319.  
41  
42  
43  
44 488 7. Benyamini Y, Gozlan M, Kokia E. Variability in the difficulties experienced by women undergo-  
45  
46 489 ing infertility treatments. *Fertil Steril.* 2005;83(2):275-283.  
47  
48  
49 490 8. Alesi R. Infertility and its treatment--an emotional roller coaster. *Aust Fam Physician.*  
50  
51 491 2005;34(3):135-138.  
52  
53  
54  
55 492 9. Merari D, Chetrit A, Modan B. Emotional reactions and attitudes prior to in vitro fertilization: An  
56  
57 493 inter-spouse study. *Psychol Health.* 2002;17(5):629-640.  
58  
59  
60

- 1  
2  
3 494 10. Klonoff-Cohen H, Chu E, Natarajan L, Sieber W. A prospective study of stress among women  
4  
5 495 undergoing in vitro fertilization or gamete intrafallopian transfer. *Fertil Steril*. 2001;76(4):675-687.  
6  
7  
8 496 11. Edelman RJ, Connolly KJ, Bartlett H. Coping strategies and psychological adjustment of cou-  
9  
10 497 ples presenting for IVF. *J Psychosom Res*. 1994;38(4):355-364.  
11  
12  
13 498 12. Eugster A, Vingerhoets AJ. Psychological aspects of in vitro fertilization: A review. *Soc Sci*  
14  
15 499 *Med*. 1999;48(5):575-589.  
16  
17  
18  
19 500 13. Stanton AL, Dunkel-Schetter C, eds. *Psychological adjustment to infertility: An overview of*  
20  
21 501 *conceptual approaches*. Stanton, Annette L.; Dunkel-Schetter, Christine . *Infertility: Perspectives*  
22  
23 502 *from stress and coping research*. The Plenum series on stress and coping. (pp. 3-16). New York,  
24  
25 503 NY, US: Plenum Press; 1991 *Infertility: Perspectives from stress and coping research*.  
26  
27  
28  
29 504 14. Benyamini Y, Gozlan M, Kokia E. Women's and men's perceptions of infertility and their asso-  
30  
31 505 ciations with psychological adjustment: A dyadic approach. *British Journal of Health Psychology*.  
32  
33 506 2009;14:1-16. doi: 10.1348/135910708X279288.  
34  
35  
36  
37 507 15. du Plessis S,S., Makker K, Desai NR, Agarwal A. Impact of oxidative stress on IVF. *Expert*  
38  
39 508 *Review of Obstetrics & Gynecology*. 2008;3(4):539-554.  
40  
41 509 <http://dx.doi.org/10.1586/17474108.3.4.539>. doi: 10.1586/17474108.3.4.539.  
42  
43  
44  
45 510 16. Agarwal A, Allamaneni SS. Role of free radicals in female reproductive diseases and assisted  
46  
47 511 reproduction. *Reprod Biomed Online*. 2004;9:338-347.  
48  
49  
50  
51 512 17. Tracey KJ. The inflammatory reflex. *Nature*. 2002;420(6917):853-859. doi:  
52  
53 513 10.1038/nature01321 [doi].  
54  
55  
56  
57  
58  
59  
60

- 1  
2  
3 514 18. Kiecolt-Glaser JK, McGuire L, Robles TF, Glaser R. Emotions, morbidity, and mortality: New  
4  
5 515 perspectives from psychoneuroimmunology. *Annu Rev Psychol.* 2002;53:83-107. doi:  
6  
7 516 10.1146/annurev.psych.53.100901.135217 [doi].  
8  
9  
10 517 19. Csemiczky G, Landgren BM, Collins A. The influence of stress and state anxiety on the out-  
11  
12 518 come of IVF-treatment: Psychological and endocrinological assessment of swedish women entering  
13  
14 519 IVF-treatment. *Acta Obstet Gynecol Scand.* 2000;79(2):113-118.  
15  
16  
17  
18 520 20. Stoleru S, Teglas JP, Fermanian J, Spira A. Psychological factors in the aetiology of infertility:  
19  
20 521 A prospective cohort study. *Hum Reprod.* 1993;8(7):1039-1046.  
21  
22  
23  
24 522 21. Demyttenaere K, Nijs P, Evers-Kiebooms G, Koninckx PR. Coping and the ineffectiveness of  
25  
26 523 coping influence the outcome of in vitro fertilization through stress responses. *Psychoneuroendo-*  
27  
28 524 *crinology.* 1992;17(6):655-665. doi: [http://dx.doi.org/10.1016/0306-4530\(92\)90024-2](http://dx.doi.org/10.1016/0306-4530(92)90024-2).  
29  
30  
31  
32 525 22. Sanders KA, Bruce NW. Psychosocial stress and treatment outcome following assisted repro-  
33  
34 526 ductive technology. *Human Reproduction.* 1999;14(6):1656-1662. doi: 10.1093/humrep/14.6.1656.  
35  
36  
37 527 23. Smeenk JM, Verhaak CM, Vingerhoets AJ, et al. Stress and outcome success in IVF: The role  
38  
39 528 of self-reports and endocrine variables. *Hum Reprod.* 2005;20(4):991-996.  
40  
41  
42  
43 529 24. Ebbesen SM, Zachariae R, Mehlsen MY, et al. Stressful life events are associated with a poor  
44  
45 530 in-vitro fertilization (IVF) outcome: A prospective study. *Hum Reprod.* 2009;24(9):2173-2182. doi:  
46  
47 531 10.1093/humrep/dep185; 10.1093/humrep/dep185.  
48  
49  
50  
51 532 25. Eugster A, Vingerhoets AJJM. Psychological aspects of in vitro fertilization: A review. *Soc Sci*  
52  
53 533 *Med.* 1999;48(5):575-589.  
54  
55  
56  
57  
58  
59  
60



- 1  
2  
3 534 26. Klonoff-Cohen H. Female and male lifestyle habits and IVF: What is known and unknown.  
4  
5 535 *Hum Reprod Update*. 2005;11(2):179-203.  
6  
7  
8  
9 536 27. Homan GF, Davies M, Norman R. The impact of lifestyle factors on reproductive performance  
10  
11 537 in the general population and those undergoing infertility treatment: A review. *Hum Reprod Up-*  
12  
13 538 *date*. 2007;13(3):209-223. doi: 10.1093/humupd/dml056.  
14  
15  
16 539 28. Matthiesen SM, Frederiksen Y, Ingerslev HJ, Zachariae R. Stress, distress and outcome of as-  
17  
18 540 sisted reproductive technology (ART): A meta-analysis. *Hum Reprod*. 2011;26(10):2763-2776. doi:  
19  
20 541 10.1093/humrep/der246; 10.1093/humrep/der246.  
21  
22  
23  
24 542 29. Boivin J, Griffiths E, Venetis CA. Emotional distress in infertile women and failure of assisted  
25  
26 543 reproductive technologies: Meta-analysis of prospective psychosocial studies. *BMJ*. 2011;342:d223.  
27  
28 544 doi: 10.1136/bmj.d223.  
29  
30  
31  
32 545 30. Boivin J. A review of psychosocial interventions in infertility. *Soc Sci Med*. 2003;57(12):2325-  
33  
34 546 2341.  
35  
36  
37 547 31. de Liz TM, Strauss B. Differential efficacy of group and individual/couple psychotherapy with  
38  
39 548 infertile patients. *Hum Reprod*. 2005;20(5):1324-1332.  
40  
41  
42  
43 549 32. Haemmerli K, Znoj H, Barth J. The efficacy of psychological interventions for infertile patients:  
44  
45 550 A meta-analysis examining mental health and pregnancy rate. *Hum Reprod Update*.  
46  
47 551 2009;15(3):279-295. doi: 10.1093/humupd/dmp002.  
48  
49  
50  
51 552 33. Hoffmann TC, Glasziou PP, Boutron I, et al. Better reporting of interventions: Template for  
52  
53 553 intervention description and replication (TIDieR) checklist and guide. *BMJ*. 2014;348:g1687. doi:  
54  
55 554 10.1136/bmj.g1687.  
56  
57  
58  
59  
60

- 1  
2  
3 555 34. Liberati A, Altman DG, Tetzlaff J, et al. The PRISMA statement for reporting systematic re-  
4  
5 556 views and meta-analyses of studies that evaluate health care interventions: Explanation and elaboration.  
6  
7 557 *PLoS Med.* 2009;6(7):e1000100. <http://dx.doi.org/10.1371%2Fjournal.pmed.1000100>.  
8  
9  
10  
11 558 35. Moher D, Liberati A, Tetzlaff J, Altman DG, The PG. Preferred reporting items for systematic  
12  
13 559 reviews and meta-analyses: The PRISMA statement. *PLoS Med.* 2009;6(7):e1000097.  
14  
15 560 <http://dx.doi.org/10.1371%2Fjournal.pmed.1000097>.  
16  
17  
18 561 36. Higgins J, Green S, eds. *Cochrane handbook for systematic reviews of interventions*. Version  
19  
20 562 5.1.0 [updated March 2011] ed. The Cochrance Collaboration; 2011. Available from  
21  
22 563 [www.cochrane-handbook.org](http://www.cochrane-handbook.org).  
23  
24  
25  
26 564 37. Gurunath S, Pandian Z, Anderson RA, Bhattacharya S. Defining infertility-a systematic review  
27  
28 565 of prevalence studies. *Hum Reprod Update.* 2011;17(5):575-588.  
29  
30  
31  
32 566 38. Jadad AR, Moore RA, Carroll D, et al. Assessing the quality of reports of randomized clinical  
33  
34 567 trials: Is blinding necessary? *Control Clin Trials.* 1996;17(1):1-12.  
35  
36  
37 568 39. Greenland S, O'rourke K. On the bias produced by quality scores in meta-analysis, and a hierar-  
38  
39 569 chical view of proposed solutions. *Biostatistics.* 2001;2(4):463-471. doi:  
40  
41 570 10.1093/biostatistics/2.4.463.  
42  
43  
44  
45 571 40. Cohen J. *Statistical power analysis for the behavioral sciences*. Hillsdale, N.J.: Lawrence Erl-  
46  
47 572 baum Associates; 1988.  
48  
49  
50  
51 573 41. Hedges L, Olkin I. *Statistical methods for meta-analysis*. New York: Acedemic Press; 1985.  
52  
53  
54 574 42. Tuschen-Caffier B, Florin I, Krause W, Pook M. Cognitive-behavioral therapy for idiopathic  
55  
56 575 infertile couples. *Psychother Psychosom.* 1999;68(1):15-21.  
57  
58  
59  
60

- 1  
2  
3 576 43. Hozo S, Djulbegovic B, Hozo I. Estimating the mean and variance from the median, range, and  
4  
5 577 the size of a sample. *BMC Medical Research Methodology*. 2005;5(1):13.  
6  
7 578 <http://www.biomedcentral.com/1471-2288/5/13>.  
8  
9  
10 579 44. Sterne JA, Egger M, Moher D. Addressing reporting biases. In: *Cochrane handbook for system-*  
11  
12 580 *atic reviews of interventions*. John Wiley & Sons, Ltd; 2008; 2008:297-333.  
13  
14 581 10.1002/9780470712184.ch10.  
15  
16  
17  
18 582 45. Koszycki D, Bisserbe J, Blier P, Bradwejn J, Markowitz J. Interpersonal psychotherapy versus  
19  
20 583 brief supportive therapy for depressed infertile women: First pilot randomized controlled trial. *Ar-*  
21  
22 584 *chives of Womens Mental Health*. 2012;15(3):193-201. doi: 10.1007/s00737-012-0277-z.  
23  
24  
25  
26 585 46. Poole C, Greenland S. Random-effects meta-analyses are not always conservative. *American*  
27  
28 586 *Journal of Epidemiology*. 1999;150(5):469-475.  
29  
30  
31  
32 587 47. Higgins JP, Thompson SG, Deeks JJ, Altman DG. Measuring inconsistency in meta-analyses.  
33  
34 588 *BMJ*. 2003;327(7414):557-560. doi: 10.1136/bmj.327.7414.557.  
35  
36  
37 589 48. Hedges LV, Pigott TD. The power of statistical tests in meta-analysis. *Psychol Methods*.  
38  
39 590 2001;6(3):203-217.  
40  
41  
42  
43 591 49. Ioannidis JP, Trikalinos TA. The appropriateness of asymmetry tests for publication bias in me-  
44  
45 592 ta-analyses: A large survey. *CMAJ*. 2007;176(8):1091-1096. doi: 10.1503/cmaj.060410.  
46  
47  
48 593 50. Copas J, Shi JQ. Meta-analysis, funnel plots and sensitivity analysis. *Biostatistics*.  
49  
50 594 2000;1(3):247-262. doi: 10.1093/biostatistics/1.3.247.  
51  
52  
53  
54  
55  
56  
57  
58  
59  
60

- 1  
2  
3 595 51. Deeks JJ, Macaskill P, Irwig L. The performance of tests of publication bias and other sample  
4  
5 596 size effects in systematic reviews of diagnostic test accuracy was assessed. *J Clin Epidemiol*.  
6  
7 597 2005;58(9):882-893. doi: 10.1016/j.jclinepi.2005.01.016.  
8  
9  
10  
11 598 52. Matthias Egger, George Davey Smith, Martin Schneider, Christoph Minder. Bias in meta-  
12  
13 599 analysis detected by a simple, graphical test. *BMJ*. 1997;315(7109):629-634. doi:  
14  
15 600 10.1136/bmj.315.7109.629.  
16  
17  
18 601 53. Rosenthal R. The file drawer problem and tolerance for null results. *Psychol Bull*.  
19  
20 602 1979;86(3):638-641. doi: 10.1037/0033-2909.86.3.638.  
21  
22  
23  
24 603 54. Duval S, Tweedie R. Trim and fill: A simple funnel-plot-based method of testing and adjusting  
25  
26 604 for publication bias in meta-analysis. *Biometrics*. 2000;56(2):455-463.  
27  
28  
29  
30 605 55. Gutierrez K. Group psychological intervention in assisted human reproduction. *Rev Iberoam*  
31  
32 606 *Fertil Reprod Humana*. 2008;25(SUPPL. 1):47-54.  
33  
34  
35 607 56. Bjornsen K. Opening the door to fertility. retreat to fertile ground: Sometimes the secret to get-  
36  
37 608 ting pregnant lies in just getting away from it all. *ALTERN MED*. 2006(88):80-81.  
38  
39 609 <http://search.ebscohost.com/login.aspx?direct=true&db=c8h&AN=2009216983&site=ehost-live>.  
40  
41  
42  
43 610 57. Pengelly P, Inglis M, Cudmore L. Infertility: Couples' experiences and the use of counselling in  
44  
45 611 treatment centres. *Psychodynamic Counselling*. 1995;1(4):507-524.  
46  
47  
48  
49 612 58. A prospective study of the effectiveness of brief professionally-led support groups for infertility  
50  
51 613 patients. *Int J Psychiatry Med*. 1992(2):173.  
52  
53  
54 614 59. Landis JR, Koch GG. The measurement of observer agreement for categorical data. *Biometrics*.  
55  
56 615 1977;33(1):159-174.  
57  
58  
59  
60

- 1  
2  
3 616 60. Galhardo A, Cunha M, Pinto-Gouveia J. Developing mindfulness and acceptance skills in infer-  
4  
5 617 tility: The mindfulness based program for infertility. *Aten Prim*. 2013;45:143.  
6  
7  
8 618 61. Nilforooshan P, Ahmadi A, Abedi MR, Ahmadi M. Counseling based on interacting cognitive  
9  
10 619 subsystems and its effect on anxiety of infertile couples. *Pakistan Journal of Psychological Re-*  
11  
12 620 *search*. 2006;21(3-4):95-103.  
13  
14 621 <http://search.proquest.com.ez.statsbiblioteket.dk:2048/docview/621710509?accountid=14468>.  
15  
16  
17  
18 622 62. Schmidt L, Holstein BE, Christensen U, Boivin J. Communication and coping as predictors of  
19  
20 623 fertility problem stress: Cohort study of 816 participants who did not achieve a delivery after 12  
21  
22 624 months of fertility treatment. *Hum Reprod*. 2005;20(11):3248-3256. doi: 10.1093/humrep/dei193.  
23  
24  
25  
26 625 63. Faramarzi M, Kheirkhah F, Esmaelzadeh S, Alipour A, Hjjahmadi M, Rahnama J. Is psycho-  
27  
28 626 therapy a reliable alternative to pharmacotherapy to promote the mental health of infertile women?  
29  
30 627 A randomized clinical trial. *Eur J Obstet Gynecol Reprod Biol*. 2008;141(1):49-53.  
31  
32  
33  
34 628 64. Lukse MP. The effect of group counseling on the frequency of grief reported by infertile cou-  
35  
36 629 ples. *JOGNN*. 1985;14(6):67S-70s.  
37  
38 630 <http://search.ebscohost.com/login.aspx?direct=true&db=c8h&AN=1986045607&site=ehost-live>.  
39  
40 631 doi: 10.1111/j.1552-6909.1985.tb02804.x.  
41  
42  
43  
44 632 65. Domar AD, Seibel MM, Benson H. The mind/body program for infertility: A new behavioral  
45  
46 633 treatment approach for women with infertility. *Fertil Steril*. 1990;53(2):246-249.  
47  
48  
49  
50 634 66. Domar AD, Zuttermeister PC, Seibel M, Benson H. Psychological improvement in infertile  
51  
52 635 women after behavioral treatment - a replication. *Fertil Steril*. 1992;58(1):144-147.  
53  
54  
55  
56 636 67. Galletly C, Clark A, Tomlinson L, Blaney F. Improved pregnancy rates for obese, infertile  
57  
58 637 women following a group treatment program: An open pilot study. *Gen Hosp Psychiatry*.  
59  
60

1  
2  
3 638 1996;18(3):192-195.

4  
5 639 <http://search.proquest.com.ez.statsbiblioteket.dk:2048/docview/618849278?accountid=14468>. doi:

6  
7 640 [http://dx.doi.org.ez.statsbiblioteket.dk:2048/10.1016/0163-8343\(96\)00006-0](http://dx.doi.org.ez.statsbiblioteket.dk:2048/10.1016/0163-8343(96)00006-0).

8  
9  
10 641 68. McQueeney DA, Stanton AL, Sigmon S. Efficacy of emotion-focused and problem-focused  
11 642 group therapies for women with fertility problems. *J Behav Med.* 1997;20(4):313-331.

12  
13 643 <http://search.proquest.com.ez.statsbiblioteket.dk:2048/docview/619146790?accountid=14468>. doi:

14  
15 644 <http://dx.doi.org.ez.statsbiblioteket.dk:2048/10.1023/A:1025560912766>.

16  
17  
18  
19  
20 645 69. Tuschen-Caffier B, Florin I, Krause W, Pook M. Cognitive-behavioral therapy for idiopathic  
21 646 infertile couples. *Psychother Psychosom.* 1999;68(1):15-21.

22  
23 647 <http://search.proquest.com.ez.statsbiblioteket.dk:2048/docview/619405653?accountid=14468>. doi:

24  
25 648 <http://dx.doi.org.ez.statsbiblioteket.dk:2048/10.1159/000012305>.

26  
27  
28  
29  
30 649 70. McNaughton-Cassill M, Bostwick JM, Arthur NJ, Robinson RD, Neal GS. Efficacy of brief  
31 650 couples support groups developed to manage the stress of in vitro fertilization treatment. *Mayo Clin*  
32 651 *Proc.* 2002;77(10):1060-1066.

33  
34 652 <http://search.ebscohost.com/login.aspx?direct=true&db=c8h&AN=2003034100&site=ehost-live>.

35  
36  
37  
38  
39  
40 653 71. M E, MD B, J D, et al. Results from a prospective, randomized, controlled study evaluating the  
41 654 acceptability and effects of routine pre-IVF counselling. In: *Human reproduction (oxford, england)*.

42  
43 655 Vol 18. ; 2003:2647-2653. [http://onlinelibrary.wiley.com/o/cochrane/clcentral/articles/003/CN-](http://onlinelibrary.wiley.com/o/cochrane/clcentral/articles/003/CN-00463003/frame.html)  
44 656 [00463003/frame.html](http://onlinelibrary.wiley.com/o/cochrane/clcentral/articles/003/CN-00463003/frame.html).

45  
46  
47  
48  
49  
50 657 72. Lee S. Effects of using a nursing crisis intervention program on psychosocial responses and  
51 658 coping strategies of infertile women during in vitro fertilization. *J NURS RES.* 2003;11(3):197-207.

52  
53 659 <http://search.ebscohost.com/login.aspx?direct=true&db=c8h&AN=2004076404&site=ehost-live>.

- 1  
2  
3 660 73. Chan CHY, Ng EHY, Chan CLW, Ho PC, Chan THY. Effectiveness of psychosocial group  
4  
5 661 intervention for reducing anxiety in women undergoing in vitro fertilization: A randomized con-  
6  
7 662 trolled study. *Fertil Steril*. 2006;85(2):339-346. doi: 10.1016/j.fertnstert.2005.07.1310.  
8  
9  
10  
11 663 74. Tuil WS, Verhaak CM, Braat DD, de Vries Robbe PF, Kremer JA. Empowering patients under-  
12  
13 664 going in vitro fertilization by providing internet access to medical data. *Fertil Steril*.  
14  
15 665 2007;88(2):361-368. doi: 10.1016/j.fertnstert.2006.11.197.  
16  
17  
18 666 75. TM C, TC G, E C, et al. Online psychoeducational support for infertile women: A randomized  
19  
20 667 controlled trial. In: *Human reproduction (oxford, england)*. Vol 23. ; 2008:554-566.  
21  
22 668 <http://onlinelibrary.wiley.com/o/cochrane/clcentral/articles/885/CN-00628885/frame.html>.  
23  
24  
25  
26 669 76. Lancaster D, Boivin J. A feasibility study of a brief coping intervention (PRCI) for the waiting  
27  
28 670 period before a pregnancy test during fertility treatment. *Hum Reprod*. 2008;23(10):2299-2307.  
29  
30  
31  
32 671 77. Noorbala AA, Ramazanzadeh F, Malekafzali H, et al. Effects of a psychological intervention on  
33  
34 672 depression in infertile couples. *International Journal of Gynecology & Obstetrics*.  
35  
36 673 2008;101(3):248-252. doi: 10.1016/j.ijgo.2007.12.010.  
37  
38  
39 674 78. Mori A. Supporting stress management for women undergoing the early stages of fertility  
40  
41 675 treatment: A cluster-randomized controlled trial. *JAPAN J NURS SCI*. 2009;6(1):37-49.  
42  
43 676 <http://search.ebscohost.com/login.aspx?direct=true&db=c8h&AN=2010359009&site=ehost-live>.  
44  
45  
46  
47 677 79. E P, A M, B T. Experimental emotional disclosure in women undergoing infertility treatment:  
48  
49 678 Are drop outs better off? In: *Social science & medicine (1982)*. Vol 69. ; 2009:678-681.  
50  
51 679 <http://onlinelibrary.wiley.com/o/cochrane/clcentral/articles/736/CN-00719736/frame.html>.  
52  
53 680 10.1016/j.socscimed.2009.06.031.  
54  
55  
56  
57  
58  
59  
60

- 1  
2  
3 681 80. Haemmerli K, Znoj H, Berger T. Internet-based support for infertile patients: A randomized  
4  
5 682 controlled study. *J Behav Med.* 2010;33(2):135-146. doi: 10.1007/s10865-009-9243-2.  
6  
7  
8  
9 683 81. Sexton MB, Byrd MR, O'Donohue WT, Jacobs NN. Web-based treatment for infertility-related  
10  
11 684 psychological distress. *Arch Women's Ment Health.* 2010;13(4):347-358.  
12  
13  
14 685 82. Hughes EG, da Silva AM. A pilot study assessing art therapy as a mental health intervention for  
15  
16 686 subfertile women. *Human Reproduction.* 2011;26(3):611-615. doi: 10.1093/humrep/deq385.  
17  
18  
19  
20 687 83. D K, J-C B, P B, J B, J M. Interpersonal psychotherapy versus brief supportive therapy for de-  
21  
22 688 pressed infertile women: First pilot randomized controlled trial. In: *Archives of women's mental*  
23  
24 689 *health.* Vol 15. ; 2012:193-201.  
25  
26 690 <http://onlinelibrary.wiley.com/o/cochrane/clcentral/articles/922/CN-00834922/frame.html>.  
27  
28  
29  
30 691 84. Matthiesen S, Klonoff-Cohen H, Zachariae R, et al. The effect of an expressive writing inter-  
31  
32 692 vention (EWI) on stress in infertile couples undergoing assisted reproductive technology (ART)  
33  
34 693 treatment: A randomized controlled pilot study. *Br J Health Psychol.* 2012;17(2):362-378. doi:  
35  
36 694 10.1111/j.2044-8287.2011.02042.x; 10.1111/j.2044-8287.2011.02042.x.  
37  
38  
39  
40 695 85. Mosalanejad L, Koolae AK, Shoyokh F. Does spiritual group psychotherapy impact on the rate  
41  
42 696 of pregnancy? A case report. *Iran J Psychiatr Behav Sci.* 2012;6(1):78-81.  
43  
44  
45  
46 697 86. L M, AK K, S J. Effect of cognitive behavioral therapy in mental health and hardiness of infer-  
47  
48 698 tile women receiving assisted reproductive therapy (ART). In: *Iranian journal of reproductive med-*  
49  
50 699 *icine.* Vol 10. ; 2012:483-488. [http://onlinelibrary.wiley.com/o/cochrane/clcentral/articles/752/CN-](http://onlinelibrary.wiley.com/o/cochrane/clcentral/articles/752/CN-00852752/frame.html)  
51  
52 700 [00852752/frame.html](http://onlinelibrary.wiley.com/o/cochrane/clcentral/articles/752/CN-00852752/frame.html).  
53  
54  
55  
56  
57  
58  
59  
60



- 1  
2  
3 701 87. Catoire P, Delaunay L, Dannappel T, et al. Hypnosis versus diazepam for embryo transfer: A  
4  
5 702 randomized controlled study. *Am J Clin Hypn*. 2013;55(4):378-386. doi:  
6  
7 703 10.1080/00029157.2012.747949.  
8  
9  
10 704 88. Sarrel PM, DeCherney AH. Psychotherapeutic intervention for treatment of couples with sec-  
11  
12 705 ondary infertility. *Fertil Steril*. 1985;43(6):897-900.  
13  
14  
15  
16 706 89. Hosaka T, Matsubayashi H, Sugiyama Y, Izumi S, Makino T. Effect of psychiatric group inter-  
17  
18 707 vention on natural-killer cell activity and pregnancy rate. *Gen Hosp Psychiatry*. 2002;24(5):353-  
19  
20 708 356.  
21  
22  
23  
24 709 90. Levitas E, Parmet A, Lunenfeld E, et al. Impact of hypnosis during embryo transfer on the out-  
25  
26 710 come of in vitro fertilization-embryo transfer: A case-control study. *Fertil Steril*. 2006;85(5):1404-  
27  
28 711 1408. doi: 10.1016/j.fertnstert.2005.10.035.  
29  
30  
31  
32 712 91. AD D, KL R, B W, et al. Impact of a group mind/body intervention on pregnancy rates in IVF  
33  
34 713 patients. In: *Fertility and sterility*. Vol 95. ; 2011:2269-2273.  
35  
36 714 <http://onlinelibrary.wiley.com/o/cochrane/clcentral/articles/060/CN-00788060/frame.html>.  
37  
38 715 10.1016/j.fertnstert.2011.03.046.  
39  
40  
41  
42 716 92. Gorayeb R, Borsari AC, Rosa-e-Silva AC, Ferriani RA. Brief cognitive behavioral intervention  
43  
44 717 in groups in a brazilian assisted reproduction program. *Behav Med*. 2012;38(2):29-35. doi:  
45  
46 718 10.1080/08964289.2012.654834; 10.1080/08964289.2012.654834.  
47  
48  
49  
50 719 93. Domar AD, Clapp D, Slawsby E, Kessel B, Orav J, Freizinger M. The impact of group psycho-  
51  
52 720 logical interventions on distress in infertile women. *Health Psychology*. 2000;19(6):568-575.  
53  
54 721 <http://search.proquest.com.ez.statsbiblioteket.dk:2048/docview/619538260?accountid=14468>. doi:  
55  
56 722 <http://dx.doi.org.ez.statsbiblioteket.dk:2048/10.1037/0278-6133.19.6.568>.  
57  
58  
59  
60

- 1  
2  
3 723 94. Terzioglu F. Investigation into effectiveness of counseling on assisted reproductive techniques  
4  
5 724 in turkey. *J Psychosom Obstet Gynecol*. 2001;22(3):133-141.  
6  
7  
8  
9 725 95. de Klerk C, Hunfeld JA, Duivenvoorden HJ, et al. Effectiveness of a psychosocial counselling  
10  
11 726 intervention for first-time IVF couples: A randomized controlled trial. *Hum Reprod*.  
12  
13 727 2005;20(5):1333-1338.  
14  
15  
16 728 96. Vizheh M, Pakgohar M, Babaei G, Ramezanzadeh F. Effect of counseling on quality of marital  
17  
18 729 relationship of infertile couples: A randomized, controlled trial (RCT) study. *Arch Gynecol Obstet*.  
19  
20 730 2013;287(3):583-589.  
21  
22  
23  
24 731 97. Chan CHY, Chan CLW, Ng EHY, et al. Incorporating spirituality in psychosocial group inter-  
25  
26 732 vention for women undergoing in vitro fertilization: A prospective randomized controlled study.  
27  
28 733 *Psychology and Psychotherapy: Theory, Research and Practice*. 2012;85(4):356-373.  
29  
30 734 <http://search.proquest.com.ez.statsbiblioteket.dk:2048/docview/1230614341?accountid=14468>. doi:  
31  
32 735 <http://dx.doi.org.ez.statsbiblioteket.dk:2048/10.1111/j.2044-8341.2011.02040.x>.  
33  
34  
35  
36 736 98. AD D, D C, EA S, J D, B K, M F. Impact of group psychological interventions on pregnancy  
37  
38 737 rates in infertile women. In: *Fertility and sterility*. Vol 73. ; 2000:805-811.  
39  
40 738 <http://onlinelibrary.wiley.com/o/cochrane/clcentral/articles/593/CN-00276593/frame.html>.  
41  
42  
43  
44 739 99. de Klerk C, Hunfeld JAM, Duivenvoorden HJ, et al. Effectiveness of a psychosocial counselling  
45  
46 740 intervention for first-time IVF couples: A randomized controlled trial. *Hum Reprod*.  
47  
48 741 2005;20(5):1333-1338.  
49  
50  
51  
52 742 100. CH C, EH N, CL C, null H, TH C. Effectiveness of psychosocial group intervention for reduc-  
53  
54 743 ing anxiety in women undergoing in vitro fertilization: A randomized controlled study. In: *Fertility*  
55  
56 744 *and sterility*. Vol 85. ; 2006:339-346.  
57  
58  
59  
60

- 1  
2  
3 745 <http://onlinelibrary.wiley.com/o/cochrane/clcentral/articles/041/CN-00556041/frame.html>.  
4  
5 746 10.1016/j.fertnstert.2005.07.1310.  
6  
7  
8 747 101. Nilforooshan P, Ahmadi A, Abedi MR, Ahmadi M. Counseling based on interacting cognitive  
9  
10 748 subsystems and its effect on anxiety of infertile couples. *Pakistan Journal of Psychological Re-*  
11  
12 749 *search*. 2006;21(3-4):95-103.  
13  
14  
15  
16 750 102. Cousineau TM, Green TC, Corsini E, et al. Online psychoeducational support for infertile  
17  
18 751 women: A randomized controlled trial. *Hum Reprod*. 2008;23(3):554-566.  
19  
20  
21  
22 752 103. Panagopoulou E, Montgomery A, Tarlatzis B. Experimental emotional disclosure in women  
23  
24 753 undergoing infertility treatment: Are drop outs better off? *Soc Sci Med*. 2009;69(5):678-681.  
25  
26  
27 754 104. Haemmerli K, Znoj H, Berger T. Internet-based support for infertile patients: A randomized  
28  
29 755 controlled study. *Journal of Behavioral Medicine*. 2010;33(2):135-146.  
30  
31  
32  
33 756 105. Sexton MB, Byrd MR, O'Donohue WT, Jacobs NN. Web-based treatment for infertility-  
34  
35 757 related psychological distress. *Archives of Women's Mental Health*. 2010;13(4):347-358.  
36  
37  
38 758 106. Chan CH, Chan CL, Ng EH, et al. Incorporating spirituality in psychosocial group intervention  
39  
40 759 for women undergoing in vitro fertilization: A prospective randomized controlled study. *Psychol*  
41  
42 760 *Psychother*. 2012;85(4):356-373. doi: 10.1111/j.2044-8341.2011.02040.x; 10.1111/j.2044-  
43  
44 761 8341.2011.02040.x.  
45  
46  
47  
48 762 107. Matthiesen S, Klonoff-Cohen H, Zachariae R, et al. The effect of an expressive writing inter-  
49  
50 763 vention (EWI) on stress in infertile couples undergoing assisted reproductive technology (ART)  
51  
52 764 treatment: A randomized controlled pilot study. *British Journal of Health Psychology*.  
53  
54 765 2012;17(2):362-378.  
55  
56  
57  
58  
59  
60

- 1  
2  
3 766 108. O'Moore AM, O'Moore RR, Harrison RF. Psychosomatic aspects in idiopathic infertility: Ef-  
4  
5 767 fects of treatment with autogenic training. *J Psychosom Res.* 1983;27(2):145-151.  
6  
7  
8 768 109. McQueeney DA, Stanton AL, Sigmon S. Efficacy of emotion-focused and problem-focused  
9  
10 769 group therapies for women with fertility problems. *J Behav Med.* 1997;20(4):313-331.  
11  
12  
13  
14 770 110. Gorayeb R, Borsari ACT, Rosa-e-Silva, Ana Carolina J. S., Ferriani RA. Brief cognitive be-  
15  
16 771 havioral intervention in groups in a brazilian assisted reproduction program. *Behavioral Medicine.*  
17  
18 772 2012;38(2):29-35.  
19  
20  
21  
22 773 111. Mosalanejad L, Koolae AK, Behbahani BM. Looking out for the secret wound: The effect of  
23  
24 774 E-cognitive group therapy with emotional disclosure on the status of mental health in infertile  
25  
26 775 women. *International Journal of Fertility & Sterility.* 2012;6(2):87-94.  
27  
28  
29  
30 776 112. Galletly C, Clark A, Tomlinson L, Blaney F. Improved pregnancy rates for obese, infertile  
31  
32 777 women following a group treatment program: An open pilot study. *General Hospital Psychiatry.*  
33  
34 778 1996;18(3):192-195.  
35  
36  
37 779 113. Noorbala AA, Ramazanzadeh F, Malekafzali H, et al. Effects of a psychological intervention  
38  
39 780 on depression in infertile couples. *Int J Gynecol Obstet.* 2008;101(3):248-252.  
40  
41  
42  
43 781 114. Hughes EG, Da Silva AM. A pilot study assessing art therapy as a mental health intervention  
44  
45 782 for subfertile women. *Hum Reprod.* 2011;26(3):611-615.  
46  
47  
48  
49 783 115. de Liz T, Strauss B. Differential efficacy of group and individual/couple psychotherapy with  
50  
51 784 infertile patients. *Human Reproduction.* 2005;20(5):1324-1332. doi: 10.1093/humrep/deh743.  
52  
53  
54  
55  
56  
57  
58  
59  
60

- 1  
2  
3 785 116. Navot D, Bergh RA, Williams MA, et al. Poor oocyte quality rather than implantation failure  
4  
5 786 as a cause of age-related decline in female fertility. *The Lancet*. 1991;337(8754):1375-1377. doi:  
6  
7 787 [http://dx.doi.org/10.1016/0140-6736\(91\)93060-M](http://dx.doi.org/10.1016/0140-6736(91)93060-M).  
8  
9  
10 788 117. Dunson DB, Colombo B, Baird DD. Changes with age in the level and duration of fertility in  
11  
12 789 the menstrual cycle. *Human Reproduction*. 2002;17(5):1399-1403. doi: 10.1093/humrep/17.5.1399.  
13  
14  
15  
16 790 118. Van den Broeck U, Emery M, Wischmann T, Thorn P. Counselling in infertility: Individual,  
17  
18 791 couple and group interventions. *Patient Educ Couns*. 2010;81(3):422-428. doi:  
19  
20 792 10.1016/j.pec.2010.10.009.  
21  
22  
23  
24 793 119. Burns LH, Covington SN. *Infertility counseling: A comprehensive handbook for clinicians*.  
25  
26 794 New York, NY, US: Parthenon Publishing Group; 1999:xvii.  
27  
28  
29 795 120. Boivin J, Appleton TC, Baetens P, et al. Guidelines for counselling in infertility: Outline ver-  
30  
31 796 sion. *Hum Reprod*. 2001;16(6):1301-1304.  
32  
33  
34  
35 797 121. Boivin J, Kantenich H, eds. *Guidelines for counselling in infertility*. ESHRE Monographs: Ox-  
36  
37 798 ford University Press; 2002.  
38  
39  
40 799 122. Gameiro S, Boivin J, Domar A. Optimal in vitro fertilization in 2020 should reduce treatment  
41  
42 800 burden and enhance care delivery for patients and staff. *Fertil Steril*. 2013;100(2):302-309. doi:  
43  
44 801 10.1016/j.fertnstert.2013.06.015 [doi].  
45  
46  
47  
48  
49  
50  
51  
52  
53  
54  
55  
56  
57  
58  
59  
60

1  
2  
3  
4  
5  
6  
7  
8  
9  
10  
11  
12  
13  
14  
15  
16  
17  
18  
19  
20  
21  
22  
23  
24  
25  
26  
27  
28  
29  
30  
31  
32  
33  
34  
35  
36  
37  
38  
39  
40  
41  
42  
43  
44  
45  
46  
47  
48  
49

803

For peer review only

## Complete search history

(1978 – April 2014)

|                                       | PsycInfo | Pubmed  | Cochrane | Embase  | Web of Science | Cinahl |
|---------------------------------------|----------|---------|----------|---------|----------------|--------|
| <b>Search 1:</b>                      |          |         |          |         |                |        |
| #1 infertil*                          | 1686     | 69.582  | 2878     | 143.265 | 45.208         | 4425   |
| #2 childlessness                      | 427      | 557     | 9        | 715     | 767            | 113    |
| #3 "IVF"                              | 321      | 17.130  | 2505     | 27.748  | 19.434         | 651    |
| #4 "ICSI"                             | 54       | 5489    | 1106     | 14.179  | 7453           | 135    |
| #5 "fertility treatment"              | 78       | 664     | 70       | 1215    | 747            | 149    |
| #6 "fertility Problems"               | 78       | 89      | 44       | 862     | 674            | 79     |
| #7 "in vitro fertil*"                 | 412      | 8742    | 1894     | 101.673 | 22.836         | 761    |
| #8 "intracytoplasmic sperm injection" | 30       | 4889    | 723      | 13.027  | 7683           | 146    |
| #9 "assisted reproduction"            | 176      | 4623    | 613      | 10.218  | 5963           | 277    |
| #10 "assisted reproductive techn*"    | 218      | 6903    | 280      | 10.913  | 6250           | 505    |
| #11 (#1 - #10:OR)                     | 2560     | 91.369  | 5752     | 202.041 | 75.747         | 5571   |
| <b>Search 2:</b>                      |          |         |          |         |                |        |
| #12 "psychological intervention"      | 1330     | 1040    | 537      | 1807    | 1300           | 339    |
| #13 "psychosocial intervention"       | 1047     | 1002    | 486      | 1504    | 1230           | 376    |
| #14 "social support"                  | 30.469   | 58.658  | 3454     | 61.497  | 36.355         | 10.702 |
| #15 "couples therapy"                 | 1895     | 495     | 114      | 2543    | 477            | 75     |
| #16 psychoeducation                   | 3551     | 1285    | 486      | 4419    | 1835           | 1560   |
| #17 psychotherapy                     | 119.862  | 159.004 | 7493     | 180.754 | 47.223         | 12.808 |
| #18 "CBT"                             | 5663     | 5017    | 2131     | 10.338  | 6326           | 1360   |
| #19 "cognitive-behavior* therapy"     | 13.914   | 1259    | 3706     | 32.160  | 13.056         | 2358   |

|                                         |            |            |           |             |            |           |
|-----------------------------------------|------------|------------|-----------|-------------|------------|-----------|
| #20 "cognitive-behavior* intervention"  | 750        | 9          | 389       | 18          | 791        | 194       |
| #21 mindfulness                         | 2912       | 1743       | 536       | 2555        | 3156       | 854       |
| #22 "acceptance and commitment therapy" | 512        | 214        | 95        | 387         | 382        | 64        |
| #23 "emotion-focused"                   | 1377       | 796        | 83        | 969         | 1063       | 448       |
| #24 psychoanalysis                      | 51.485     | 11.421     | 81        | 28432       | 16.717     | 627       |
| #25 "relational therapy"                | 82         | 20         | 2         | 31          | 32         | 4         |
| #26 relaxation                          | 9334       | 107.502    | 6121      | 116.625     | 305.797    | 6933      |
| #27 hypnosis                            | 10.571     | 12.898     | 1063      | 11.503      | 7490       | 1850      |
| #28 hypnotherapy                        | 3506       | 13.068     | 217       | 1206        | 1122       | 226       |
| #29 "internet-based therapy"            | 26         | 22         | 12        | 36          | 29         | 6         |
| #30 "internet-based intervention"       | 107        | 121        | 66        | 124         | 129        | 32        |
| #31 "web-based therapy"                 | 15         | 7          | 2         | 12          | 14         | 3         |
| #32 "web-based intervention"            | 135        | 218        | 117       | 249         | 257        | 68        |
| #33 (#12 - #32:OR)                      | 219.898    | 327.062    | 20.473    | 379.392     | 429.409    | 36.993    |
| <b>Search 3:</b>                        | <b>311</b> | <b>593</b> | <b>77</b> | <b>1708</b> | <b>328</b> | <b>82</b> |

## Total of all searches

|               | Initial search<br>(combination 1+2) | Additional records | Excluded<br>(due to duplicates) | Excluded<br>(due to title + abstract) | Final**<br>(articles coded individually) |
|---------------|-------------------------------------|--------------------|---------------------------------|---------------------------------------|------------------------------------------|
| All databases | 3099                                | 6                  | 728                             | 2220                                  | 157                                      |

- Additional records identified n=6



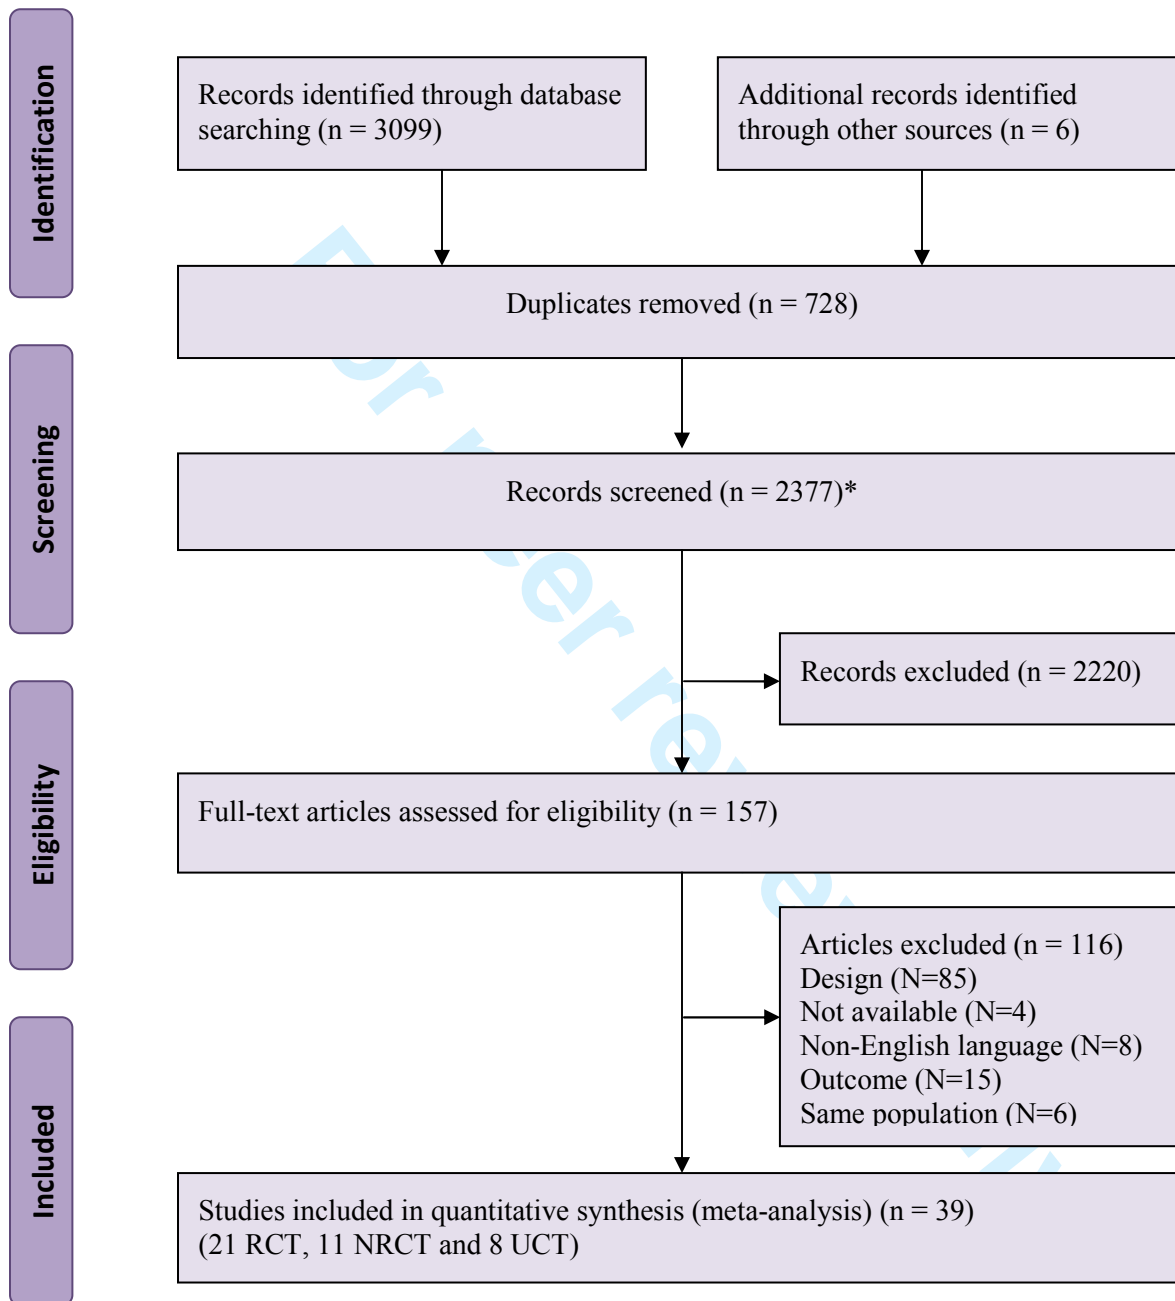

**Fig 1** PRISMA flowchart.\*Screened according to the exclusion criteria presented in the Methods section.

1  
2  
3  
4  
5  
6  
7  
8  
9  
10  
11  
12  
13  
14  
15  
16  
17  
18  
19  
20  
21  
22  
23  
24  
25  
26  
27  
28  
29  
30  
31  
32  
33  
34  
35  
36  
37  
38  
39  
40  
41  
42  
43  
44  
45  
46  
47  
48  
49  
50  
51  
52  
53  
54  
55  
56  
57  
58  
59  
60

**Pregnancy rate**

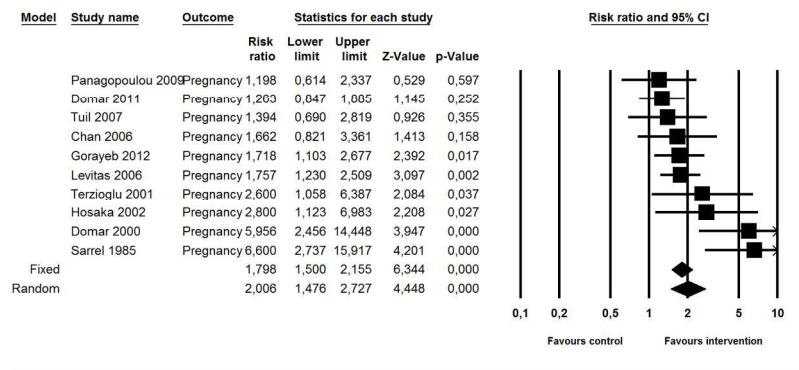

Review only

1  
2  
3  
4  
5  
6  
7  
8  
9  
10  
11  
12  
13  
14  
15  
16  
17  
18  
19  
20  
21  
22  
23  
24  
25  
26  
27  
28  
29  
30  
31  
32  
33  
34  
35  
36  
37  
38  
39  
40  
41  
42  
43  
44  
45  
46  
47  
48  
49  
50  
51  
52  
53  
54  
55  
56  
57  
58  
59  
60

Psychological outcomes combined

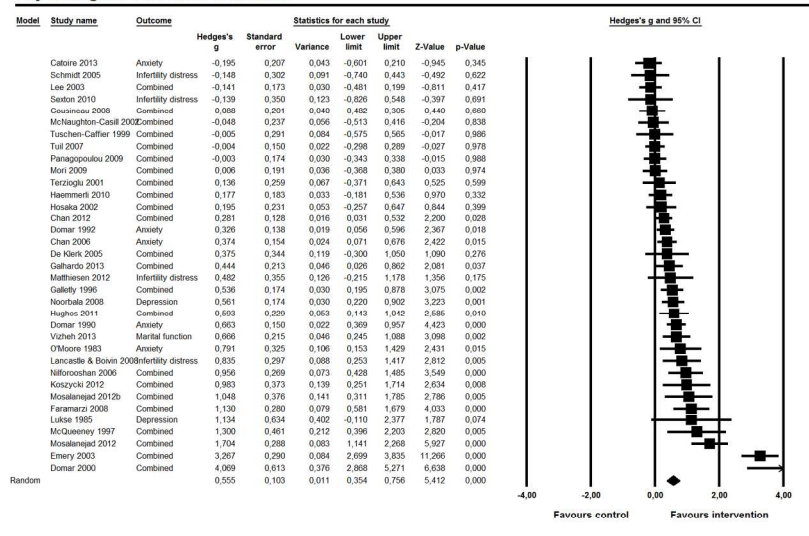

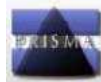

# PRISMA 2009 Checklist

| Section/topic                      | #  | Checklist item                                                                                                                                                                                                                                                                                              | Reported on page # |
|------------------------------------|----|-------------------------------------------------------------------------------------------------------------------------------------------------------------------------------------------------------------------------------------------------------------------------------------------------------------|--------------------|
| <b>TITLE</b>                       |    |                                                                                                                                                                                                                                                                                                             |                    |
| Title                              | 1  | Identify the report as a systematic review, meta-analysis, or both.                                                                                                                                                                                                                                         | 1                  |
| <b>ABSTRACT</b>                    |    |                                                                                                                                                                                                                                                                                                             |                    |
| Structured summary                 | 2  | Provide a structured summary including, as applicable: background; objectives; data sources; study eligibility criteria, participants, and interventions; study appraisal and synthesis methods; results; limitations; conclusions and implications of key findings; systematic review registration number. | 2                  |
| <b>INTRODUCTION</b>                |    |                                                                                                                                                                                                                                                                                                             |                    |
| Rationale                          | 3  | Describe the rationale for the review in the context of what is already known.                                                                                                                                                                                                                              | 3-4                |
| Objectives                         | 4  | Provide an explicit statement of questions being addressed with reference to participants, interventions, comparisons, outcomes, and study design (PICOS).                                                                                                                                                  | 4                  |
| <b>METHODS</b>                     |    |                                                                                                                                                                                                                                                                                                             |                    |
| Protocol and registration          | 5  | Indicate if a review protocol exists, if and where it can be accessed (e.g., Web address), and, if available, provide registration information including registration number.                                                                                                                               |                    |
| Eligibility criteria               | 6  | Specify study characteristics (e.g., PICOS, length of follow-up) and report characteristics (e.g., years considered, language, publication status) used as criteria for eligibility, giving rationale.                                                                                                      | 5-6                |
| Information sources                | 7  | Describe all information sources (e.g., databases with dates of coverage, contact with study authors to identify additional studies) in the search and date last searched.                                                                                                                                  | 5                  |
| Search                             | 8  | Present full electronic search strategy for at least one database, including any limits used, such that it could be repeated.                                                                                                                                                                               | 5                  |
| Study selection                    | 9  | State the process for selecting studies (i.e., screening, eligibility, included in systematic review, and, if applicable, included in the meta-analysis).                                                                                                                                                   | 5-6                |
| Data collection process            | 10 | Describe method of data extraction from reports (e.g., piloted forms, independently, in duplicate) and any processes for obtaining and confirming data from investigators.                                                                                                                                  | 6-7                |
| Data items                         | 11 | List and define all variables for which data were sought (e.g., PICOS, funding sources) and any assumptions and simplifications made.                                                                                                                                                                       | 6                  |
| Risk of bias in individual studies | 12 | Describe methods used for assessing risk of bias of individual studies (including specification of whether this was done at the study or outcome level), and how this information is to be used in any data synthesis.                                                                                      | 7                  |
| Summary measures                   | 13 | State the principal summary measures (e.g., risk ratio, difference in means).                                                                                                                                                                                                                               |                    |
| Synthesis of results               | 14 | Describe the methods of handling data and combining results of studies, if done, including measures of consistency (e.g., $I^2$ for each meta-analysis)                                                                                                                                                     | 7-9                |

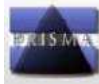

# PRISMA 2009 Checklist

Page 1 of 2

| Section/topic                 | #  | Checklist item                                                                                                                                                                                           | Reported on page # |
|-------------------------------|----|----------------------------------------------------------------------------------------------------------------------------------------------------------------------------------------------------------|--------------------|
| Risk of bias across studies   | 15 | Specify any assessment of risk of bias that may affect the cumulative evidence (e.g., publication bias, selective reporting within studies).                                                             | 8-9                |
| Additional analyses           | 16 | Describe methods of additional analyses (e.g., sensitivity or subgroup analyses, meta-regression), if done, indicating which were pre-specified.                                                         | 8                  |
| <b>RESULTS</b>                |    |                                                                                                                                                                                                          |                    |
| Study selection               | 17 | Give numbers of studies screened, assessed for eligibility, and included in the review, with reasons for exclusions at each stage, ideally with a flow diagram.                                          | 9                  |
| Study characteristics         | 18 | For each study, present characteristics for which data were extracted (e.g., study size, PICOS, follow-up period) and provide the citations.                                                             | 10                 |
| Risk of bias within studies   | 19 | Present data on risk of bias of each study and, if available, any outcome level assessment (see item 12).                                                                                                | 10-11              |
| Results of individual studies | 20 | For all outcomes considered (benefits or harms), present, for each study: (a) simple summary data for each intervention group (b) effect estimates and confidence intervals, ideally with a forest plot. | 11                 |
| Synthesis of results          | 21 | Present results of each meta-analysis done, including confidence intervals and measures of consistency.                                                                                                  | 11                 |
| Risk of bias across studies   | 22 | Present results of any assessment of risk of bias across studies (see Item 15).                                                                                                                          | 12-13              |
| Additional analysis           | 23 | Give results of additional analyses, if done (e.g., sensitivity or subgroup analyses, meta-regression [see Item 16]).                                                                                    | 13-14              |
| <b>DISCUSSION</b>             |    |                                                                                                                                                                                                          |                    |
| Summary of evidence           | 24 | Summarize the main findings including the strength of evidence for each main outcome; consider their relevance to key groups (e.g., healthcare providers, users, and policy makers).                     | 14                 |
| Limitations                   | 25 | Discuss limitations at study and outcome level (e.g., risk of bias), and at review-level (e.g., incomplete retrieval of identified research, reporting bias).                                            | 16-17              |
| Conclusions                   | 26 | Provide a general interpretation of the results in the context of other evidence, and implications for future research.                                                                                  | 17-18              |
| <b>FUNDING</b>                |    |                                                                                                                                                                                                          |                    |
| Funding                       | 27 | Describe sources of funding for the systematic review and other support (e.g., supply of data); role of funders for the systematic review.                                                               | 19                 |

From: Moher D, Liberati A, Tetzlaff J, Altman DG, The PRISMA Group (2009). Preferred Reporting Items for Systematic Reviews and Meta-Analyses: The PRISMA Statement. PLoS Med 6(6): e1000097. doi:10.1371/journal.pmed1000097

For more information, visit: [www.prisma-statement.org](http://www.prisma-statement.org).

Page 2 of 2  
For peer review only - <http://bmjopen.bmj.com/site/about/guidelines.xhtml>

# BMJ Open

## Efficacy of psychosocial interventions for psychological and pregnancy outcomes in infertile women and men: A systematic review and meta-analysis

|                                 |                                                                                                                                                                                                                                                                                                                                                                                                                                                                                          |
|---------------------------------|------------------------------------------------------------------------------------------------------------------------------------------------------------------------------------------------------------------------------------------------------------------------------------------------------------------------------------------------------------------------------------------------------------------------------------------------------------------------------------------|
| Journal:                        | <i>BMJ Open</i>                                                                                                                                                                                                                                                                                                                                                                                                                                                                          |
| Manuscript ID:                  | bmjopen-2014-006592.R1                                                                                                                                                                                                                                                                                                                                                                                                                                                                   |
| Article Type:                   | Research                                                                                                                                                                                                                                                                                                                                                                                                                                                                                 |
| Date Submitted by the Author:   | 28-Nov-2014                                                                                                                                                                                                                                                                                                                                                                                                                                                                              |
| Complete List of Authors:       | Frederiksen, Yoon; Aarhus University, Department of Psychology and Social Sciences<br>Farver-Vestergaard, Ingeborg; Aarhus University, Department of Psychology<br>Skovgård, Ninna; Aarhus University Hospital, Skejby Fertility Clinic<br>Ingerslev, Hans Jakob; Aarhus University Hospital, Center for Preimplantation Genetic Diagnosis/The Fertility Clinic<br>Zachariae, Robert; Aarhus University Hospital, Department of Oncology;<br>Aarhus University, Department of Psychology |
| <b>Primary Subject Heading</b>: | Evidence based practice                                                                                                                                                                                                                                                                                                                                                                                                                                                                  |
| Secondary Subject Heading:      | Reproductive medicine                                                                                                                                                                                                                                                                                                                                                                                                                                                                    |
| Keywords:                       | Infertility, Psychosocial intervention, distress, pregnancy                                                                                                                                                                                                                                                                                                                                                                                                                              |
|                                 |                                                                                                                                                                                                                                                                                                                                                                                                                                                                                          |

SCHOLARONE™  
Manuscripts

Only

1 **Title Page****Efficacy of psychosocial interventions for psychological and pregnancy outcomes in infertile women and men: A systematic review and meta-analysis**

Yoon Frederiksen, Ingeborg Farver-Vestergaard, Ninna Grønhøj Skovgård, Hans Jakob Ingerslev, Robert Zachariae

Unit for Psychooncology and Health Psychology, Department of Psychology, University of Aarhus, 8000 Aarhus, Denmark Yoon Frederiksen MSc. Psychology, PhD-fellow Unit for Psychooncology and Health Psychology, Department of Psychology and Behavioural Science, University of Aarhus, 8000 Aarhus, Denmark Ingeborg Farver-Vestergaard MSc., Psychology, PhD-fellow Unit for Psychooncology and Health Psychology, Department of Psychology and Behavioural Science, Aarhus University, 8000 Aarhus, Denmark Ninna Grønhøj Skovgaard, research assistant, Skejby Fertility Clinic, Aarhus University Hospital, 8200 Aarhus Denmark. Hans Jakob Ingerslev, Professor, MD, DMSc, Unit for Psychooncology and Health Psychology, Department of Psychology, Aarhus University, 8000 Aarhus, Denmark Department of Oncology, Aarhus University Hospital, 8000 Aarhus Denmark Robert Zachariae, DMSci., professor.

Correspondence to: Yoon Frederiksen [yoanf@psy.au.dk](mailto:yoanf@psy.au.dk) Phone no. +45 8716 5872

Keywords: infertility/psychosocial intervention/distress/pregnancy

Word count: 5.877

Author statement: The Corresponding Author has the right to grant on behalf of all authors and does grant on behalf of all authors, an exclusive licence (or non exclusive for government employees) on a worldwide basis to the BMJ Publishing Group Ltd to permit this article (if accepted) to be published in BMJ editions and any other BMJ PGL products and sublicences such use and exploit all subsidiary rights, as set out in our licence.

Competing interest: All authors have completed the Unified Competing Interest form and are available upon request from the Corresponding Author

## 5 Abstract

6 **Objective:** To evaluate the evidence on the efficacy of psychosocial interventions for improving  
7 pregnancy rates and reducing distress for couples in treatment with assisted reproductive technology  
8 (ART).

9 **Design:** Systematic review and meta-analysis.

10 **Data sources** PsycINFO, PubMed, Embase, CINAHL, Web of Science and The Cochrane Library  
11 between 1978 and April 2014.

12 **Study selection** Studies were considered eligible if they evaluated the effect of any psychosocial  
13 intervention on clinical pregnancy and/or distress in infertile participants, used a quantitative ap-  
14 proach, and were published in English.

15 **Data extraction** Study characteristics and results were extracted and the methodological quality  
16 assessed. Effect sizes (Hedges  $g$ ) were pooled using a random effect model. Heterogeneity was as-  
17 sessed using the  $Q$  statistic and  $I^2$ , and publication bias evaluated using Eggers' method. Possible  
18 moderators and mediators were explored with meta-ANOVAs and meta-regression.

19 **Results** We identified 39 eligible studies (total  $N = 2746$  men and women) assessing the effects of  
20 psychological treatment on pregnancy rates and/or adverse psychological outcomes, including de-  
21 pressive symptoms, anxiety, infertility stress, and marital function. Statistically significant and ro-  
22 bust overall effects of psychosocial intervention were found for both clinical pregnancy ( $RR = 2.01$ ;  
23  $CI: 1.48-2.73$ ;  $p < 0.001$ ) and combined psychological outcomes (Hedges  $g = 0.59$ ;  $CI: 0.38-0.80$ ;  
24  $p = 0.001$ ). The pooled effect sizes (ES) for psychological outcomes were generally larger for wom-  
25 en ( $g: 0.51-0.73$ ) than men ( $0.13-0.34$ ), but the difference only reached statistical significance for  
26 depressive symptoms ( $p = 0.004$ ). Meta-regression indicated that larger reductions in anxiety were  
27 associated with greater improvement in pregnancy rates (Slope:  $0.19$ ;  $p = 0.004$ ). No clear-cut differ-  
28 ences were found between effects of cognitive behavioral therapy (CBT) ( $g = 0.84$ ), mind-body in-  
29 terventions ( $0.61$ ), and other intervention types ( $0.50$ ).

30 **Conclusion** The present meta-analysis suggests that psychosocial interventions for couples in  
31 treatment for infertility, in particular CBT, could be efficacious, both in reducing psychological  
32 distress and in improving clinical pregnancy rates.

33 **Strengths and limitations of this study**



- 34 • A major strength of this study is the extensive search of various databases from 1978 to
- 35 April 2014, as well as a comprehensive methodological assessment
- 36 • Further analyses were performed to account for publication bias, yielding conservative ef-
- 37 fect sizes and thus strengthening the robustness of the estimates
- 38 • Heterogeneity and indications of publication bias were observed for several of the outcomes
- 39 • Substantial variation of the methodological quality and missing information on fertility and
- 40 ART treatment may limit the interpretability of the outcomes

## 41 **Introduction**

42 Fecundity has become a growing problem for many couples trying to conceive a child and although  
43 not all couples choose to seek medical assistance, more than 10% of the childbearing population has  
44 resorted to assisted reproductive technology (ART) to conceive.<sup>1-5</sup> Being involuntarily childless and  
45 going through various ART procedures imposes considerable stress on the couple, and childlessness  
46 is often perceived as a life crisis where the emotional strain equals that found for traumatic  
47 events.<sup>2,6-10</sup> Although infertile couples may be considered mentally healthy in general,<sup>11</sup> several  
48 studies indicate that coping with infertility is associated with periodically heightened levels of psy-  
49 chological symptoms of distress, depression and anxiety.<sup>12,13</sup> Feelings of loss, grief, anger, and sad-  
50 ness are not uncommon, and women often report bodily disparagement, lack of femininity, shame,  
51 and self-blame.<sup>2,14</sup> There is some evidence to suggest that dysregulation in the uterus microenvi-  
52 ronment may influence the ability to conceive, e.g. oxidative stress and inflammation,<sup>15,16</sup> which  
53 may be promoted by psychological distress.<sup>17,18</sup> Such findings have lead several studies to investi-  
54 gate possible links between mental state and pregnancy outcome.<sup>10,19-24</sup> Although the results have  
55 been mixed, reviews of the literature have generally reached the conclusion that psychosocial fac-  
56 tors such as depressive symptoms, anxiety, distress, and certain coping strategies are linked to re-  
57 duced chances of pregnancy.<sup>12,25,26</sup> Two recently published meta-analyses, however, report conflict-  
58 ing results.<sup>27,28</sup> Whereas one meta-analysis supported the conclusion that emotional distress may be  
59 critical to the success of fertility treatment outcome,<sup>27</sup> the other did not find sufficient support for

1  
2  
3 60 this hypothesis.<sup>28</sup> The different conclusions could be due to between-study methodological differ-  
4  
5 61 ences, e.g. in the chosen measures of distress and definitions of pregnancy (e.g. serum positive test,  
6  
7 62 clinical pregnancy, or live birth).  
8  
9

10 63 Nonetheless, the evidence indicating a considerable psychosocial burden associated with infertility  
11  
12 64 and its treatment has inspired several researchers to explore the effect of various psychosocial inter-  
13  
14 65 ventions in reducing distress, improving quality-of-life, and thereby, possibly, optimize the chances  
15  
16 66 of pregnancy. So far, three meta-analyses have reviewed effects of psychological interventions on  
17  
18 67 mental health and pregnancy outcome. Again, the results have been mixed. The first meta-analysis,  
19  
20 68 published in 2003, concluded that psychological intervention appeared to have a beneficial effect on  
21  
22 69 negative emotions,<sup>29</sup> particularly anxiety. An effect of counseling was also found for infertility-  
23  
24 70 related distress, whereas no clear effect was seen on pregnancy rates. Although the original system-  
25  
26 71 atic review identified 25 independent studies, the final meta-analysis only included 8–10 studies  
27  
28 72 selected on the basis of their methodological quality. The second meta-analysis published in 2005  
29  
30 73 focused on differences in effects related to intervention format, e.g. individual/couple vs. group  
31  
32 74 setting.<sup>30</sup> Overall, the results suggested that both individual/couple and group interventions were  
33  
34 75 effective in reducing emotional distress as well as increasing the conception rate. In contrast to the  
35  
36 76 two first meta-analyses, which had investigated both controlled and uncontrolled studies, the third  
37  
38 77 meta-analysis from 2009, which only included controlled studies,<sup>31</sup> found no evidence for an effect  
39  
40 78 of psychological interventions on emotional distress. An effect, however, was found for pregnancy  
41  
42 79 rates, but only for infertile couples not in ART.  
43  
44  
45  
46  
47  
48

49 80 Taken together, while showing promising results, the findings of existing quantitative systematic  
50  
51 81 reviews, the most recent published in 2009, are mixed. The literature within this field is expanding,  
52  
53 82 and studies of new psychosocial intervention approaches building on existing knowledge and target-  
54  
55 83 ing specific problems of infertile patients, e.g. mind/body interventions, web-based treatments, and  
56  
57 84 online psycho-education programs, have since been published. Furthermore, the more recently pub-  
58  
59  
60

1  
2  
3 85 lished studies have generally used randomized controlled trial designs, a notable strength reducing  
4  
5 86 the risk of bias and making the studies more easily comparable.<sup>32</sup> An updated review and meta-  
6  
7 87 analysis is needed to determine to which degree psychosocial interventions may reduce infertility  
8  
9  
10 88 related distress related to improvement of pregnancy chances during fertility treatment.

## 11 12 13 14 89 **Methods**

15  
16 90 The present study was conducted in accordance with the preferred reporting items for systematic  
17  
18 91 reviews and meta-analysis (PRISMA) recommendations.<sup>33,34</sup> An *a priori* designed study protocol  
19  
20  
21 92 guided the literature search, study selection, and data synthesis.

### 22 23 24 93 **Search strategy and criteria**

25  
26 94 A comprehensive and systematic search of the literature published between 1978 (first baby born  
27  
28 95 after in vitro fertilization) and April 2014 was conducted, using a sensitive search strategy recom-  
29  
30 96 mended for reviews by Higgins and Green.<sup>35</sup> When conducting the searches, we combined key-  
31  
32 97 words representing the two primary concepts, infertility and psychosocial treatment: (i) “infertil\*”,  
33  
34 98 “childlessness”, “IVF”, “ICSI”, “fertility treatment/problems” “assisted reproduction” and (ii) “psy-  
35  
36 99 chological/psychosocial intervention”, “social support”, “couples therapy”, “psycho-education”,  
37  
38  
39 100 “internet-based intervention” and “behavioral therapy” (for a full search history, see appendix 1).  
40  
41 101 We identified relevant records by electronic searches in general medical and psychological data-  
42  
43 102 bases: PubMed, PsycINFO, The Cochrane Library, Embase, CINAHL, and Web of Science. Fur-  
44  
45 103 thermore, we cross-examined reference lists of the retrieved papers and reviews for additional rele-  
46  
47 104 vant studies. We did not pursue the grey literature or trial registries, and limited our search to in-  
48  
49 105 clude only peer-reviewed articles published in English.

### 50 51 52 53 106 **Study selection**

54  
55 107 Studies were considered eligible if they 1) reported data on infertile participants 2) presented data  
56  
57 108 on a psychosocial intervention or a supportive program 3) included both baseline and post-  
58  
59  
60

1  
2  
3 109 intervention measures of stress, distress or pregnancy outcome 4) used a quantitative research ap-  
4  
5 110 proach. In general terms, infertility refers to not being able to conceive for more than one year  
6  
7 111 without contraception (WHO, 2002). Despite this standard definition, a recent review has found  
8  
9 112 considerable between-study variation in definitions.<sup>36</sup> Furthermore, infertility can be graded in rela-  
10  
11 113 tion to clinical diagnosis and duration. The present meta-analysis reviews studies using several dif-  
12  
13 114 ferent definitions of the term “infertile”, and includes all studies of patients diagnosed with different  
14  
15 115 types of infertility and in different types and stages of ART treatments, e.g. intrauterine insemina-  
16  
17 116 tion (IUI), in vitro fertilization (IVF), and intracytoplasmic sperm injection (ICSI). “Psychosocial  
18  
19 117 interventions or supportive programs” were defined as all interventions with a psychosocial aim that  
20  
21 118 did not include the prescription of medication had a primary physical focus, e.g. acupuncture or  
22  
23 119 massage therapy. However, studies using “psychophysiological” approaches, e.g. relaxation, guided  
24  
25 120 imagery or meditation exercises as part of a psychosocial program, were included. The interven-  
26  
27 121 tions could be delivered in individual-, group-, couples-, or internet-based format. We included both  
28  
29 122 controlled and uncontrolled trial studies, but chose to exclude expert opinion, magazines, commen-  
30  
31 123 taries, case reports, editorials, newspaper articles, newsletters, and books chapters. Neither did we  
32  
33 124 include abstracts-only, doctoral theses, or conference presentations. Our primary outcome was  
34  
35 125 pregnancy rate, defined as *clinical pregnancy*. This clinical definition implies a visualization of at  
36  
37 126 least one gestational sack and fetal heartbeat in approximately the 5<sup>th</sup> week after fertilization. Sec-  
38  
39 127 ondary outcome measures were psychological ratings of depressive symptoms, anxiety, generalized  
40  
41 128 stress, specific infertility stress, and interpersonal functioning assessed through self-reported ques-  
42  
43 129 tionnaires.  
44  
45  
46  
47  
48

### 50 **Data extraction and quality assessment**

51  
52 131 All full-text articles were read by two independent review authors (IFV, NGS) and the data extract-  
53  
54 132 ed according to predefined criteria. Disagreements were discussed with a third author (YF) and re-  
55  
56 133 solved by consensus. If information on any outcome was missing or if clarifications were needed,  
57  
58  
59  
60

1  
2  
3 134 authors were contacted for further information. Each study was assessed for methodological quality  
4  
5 135 using the Jadad criteria,<sup>37</sup> a commonly used tool to evaluate methodological quality, e.g. use and  
6  
7 136 adequate description of randomization- and blinding procedures, and description of drop-out rates  
8  
9  
10 137 (score range: 0-5). In addition to the 0-5 points possible on the original Jadad scale, one additional  
11  
12 138 point was given for each of the following: (a) *was a control group included*; in order to  
13  
14 139 acknowledge whether the intervention group was compared with another group, although randomi-  
15  
16 140 zation was not used, (b) *were both pre- and post-data presented*; as including both pre- and post-  
17  
18 141 intervention data will provide more accurate results. (c) *Was any form of blinding or masking of*  
19  
20 142 *conditions to patients, or (d) blinding of researchers attempted*; acknowledging if the study had  
21  
22 143 attempted to masking the active condition, (e) *was a standardized and reliable outcome measure*  
23  
24 144 *used*; a criterion increasing the validity and comparability of the outcomes, and (f) *were pre-post*  
25  
26 145 *correlations provided*; which could provide better estimates of the effect size. The modified scale  
27  
28 146 yielded a total quality score ranging from 0-11. With respect to the modified quality score, the mean  
29  
30 147 score difference between Rater 1 and 2 (means (SD): 5.2 (1.8) and 5.6 (2.0)) did not reach statistical  
31  
32 148 significance ( $t(77) = 1.1$ ;  $p = 0.28$ ), and the inter-rater score correlation was  $r = 0.83$  ( $p < 0.001$ ).  
33  
34 149 Kappa statistic was not used, as this assumes the nominal data and no natural ordering of ratings.  
35  
36 150 Quality ratings were not used as weights when calculating aggregated effect sizes (ES) as this is  
37  
38 151 generally discouraged due to the risk of introducing additional bias.<sup>38</sup> Instead, associations between  
39  
40 152 ESs and study quality indicators were explored with meta-ANOVAs (design) and meta-regression  
41  
42 153 (modified quality-score). In cases where we were unable to retrieve articles from the authorized  
43  
44 154 databases, authors were contacted between 1-3 times in order to amend the data collected.  
45  
46  
47  
48  
49  
50  
51  
52  
53  
54  
55  
56  
57  
58  
59  
60

## 155 **Calculating effect sizes**

156 The effect sizes (ESs) used were the risk ratio (RR) for pregnancy and Hedges  $g$  for psychological  
157 outcomes. Hedges'  $g$  is a variation of Cohen's  $d$  which enables correction of potential bias due to  
158 small sample size.<sup>39,40</sup> A positive Hedges'  $g$  indicates result in the expected direction, e.g. a reduc-  
159 tion in distress in the intervention group compared to controls. A  $RR > 1.0$  indicates a greater pro-  
160 portion of pregnancies in the intervention group. RRs were based on pregnancy rates and total  $N$  in  
161 the intervention and control groups ( $k=10$ ) ( $k$  = number of studies). When possible, Hedges'  $g$  was  
162 calculated on the basis of reported means and SDs at pre and post-intervention or means and SDs of  
163 change scores. This was possible for 50 of 61 effect sizes. When required and available, the report-  
164 ed pre-post correlations were used in the calculation. This was the case for 5 ES's. When unavaila-  
165 ble, the pre-post correlation was set to 0.50. When SDs were unavailable, two approaches were  
166 used. For STAI state anxiety scores, the average pre- and post SDs (10.9 and 10.8) for the studies  
167 which reported the SD was used, as the SDs appeared to be highly comparable across the remaining  
168 studies. For other measures, ESs were estimated either on the basis of sample size and either  $p$ -  
169 value or Eta square. In one study reporting only medians,<sup>41</sup> the means and SDs were estimated fol-  
170 lowing a previously suggested approach.<sup>42</sup>

## 171 **Heterogeneity**

172 Heterogeneity was assessed using  $Q$  and  $I^2$  statistics. Heterogeneity tests are aimed at determining  
173 whether results reflect genuine between-study differences (heterogeneity), or whether the variation  
174 is due to chance (homogeneity).<sup>43</sup> In accordance with recommendations, a  $p$ -value  $\leq 0.10$  was used  
175 to determine significant heterogeneity due to the general low statistical power of heterogeneity  
176 tests.<sup>44</sup> The  $I^2$  quantity provides a measure of the degree of inconsistency by estimating the amount  
177 of variance in a pooled ES that can be accounted for by heterogeneity in the sample of studies.<sup>45</sup>  $I^2$   
178 values of 0%, 25%, 50%, and 75% indicate no, low, moderate, and high heterogeneity, respectively.

1  
2  
3 179 **Analytical strategy**  
4

5 180 All ESs were weighted with the inverse variance and combined with a random effects model. First,  
6  
7 181 the overall ES of the effect of psychosocial interventions on pregnancy rates was calculated. Then  
8  
9 182 the overall ES for the combined psychological outcomes was calculated together with the overall  
10  
11 183 ESs for the individual outcome measures of depression, state anxiety, infertility-related distress, and  
12  
13 184 marital function. This was done for the combined sample (women + men). If the results indicated  
14  
15 185 study heterogeneity, and if the number of studies in each category was sufficient ( $K \geq 3$ ), possible  
16  
17 186 between-study differences in ESs were explored by comparing the ESs of studies according to the  
18  
19 187 following study characteristics: gender, study design, intervention type, and intervention format  
20  
21 188 (mixed effect meta-ANOVAs), methodological quality (modified quality score), mean age of the  
22  
23 189 sample, intervention duration, and number of sessions (mixed effect meta-regression).  
24  
25  
26  
27

28 190 Prior to the search, statistical power analyses were conducted as previously recommended.<sup>46</sup> Based  
29  
30 191 on the findings of the earlier meta-analysis,<sup>31</sup> we expected to find a RR of 1.4 for pregnancy rates  
31  
32 192 and an average sample size of  $N=76$ . We expected to be able to detect a similar small ES (Hedges  $g$   
33  
34 193 = 0.28 or RR = 1.4) with an alpha of 5% and a statistical power of 80%, with a total of only 9 stud-  
35  
36 194 ies, using a random-effects model. Based on these results, we considered it worthwhile to conduct  
37  
38 195 the meta-analysis. The calculations were conducted using Comprehensive Meta-Analysis, Version 2  
39  
40 196 (www.meta-analysis.com), IBM SPSS-20, and various formulas in Microsoft Excel.  
41  
42  
43  
44

45 197 **Publication bias**

46 198 The possibility of publication bias, a widespread problem when conducting meta-analyses, was  
47  
48 199 evaluated with funnel plots,<sup>47</sup> Egger's method, and by calculating fail-safe numbers.<sup>48,49</sup> A funnel  
49  
50 200 plot is a graphic illustration of study ESs in relation to study size or precision. Egger's test provides  
51  
52 201 a statistic for the skewness of results.<sup>50</sup> Calculation of fail-safe numbers is aimed at achieving an  
53  
54 202 indication of the number of unpublished studies with null-findings that would reduce the result to  
55  
56 203 statistical non-significance ( $p > 0.05$ ). It has been suggested that a reasonable level is achieved if the  
57  
58  
59  
60

1  
2  
3 204 fail-safe number exceeds  $5K+10$  ( $K = N$  studies in the meta-analysis).<sup>51</sup> If the results were sugges-  
4  
5 205 tive of publication bias, an adjusted ES was calculated using Duval and Tweedie's trim and fill  
6  
7 206 method,<sup>52</sup> which imputes ESs of missing studies and recalculates the ES accordingly.

## 11 207 **Results**

### 15 208 **Study selection**

17 209 In a first screening, duplicates were identified, and titles and abstracts reviewed. A total of 157 stud-  
18  
19 210 ies were found potentially relevant and reviewed independently by two raters. Four articles could  
20  
21 211 not be retrieved due to "no access" policy from the university, and the authors did not respond to  
22  
23 212 our enquiries.<sup>53-56</sup> Initially, the raters were uncertain or disagreed on 13 (8.3%) articles (inter-rater  
24  
25 213 agreement: 0.78;  $p < 0.001$  (Kappa statistic)) indicating "substantial agreement."<sup>57</sup> After negotiation,  
26  
27 214 5 of these were included, resulting in 41 potentially eligible articles. One additional study was ex-  
28  
29 215 cluded due to the combination of psychological intervention with a psychoactive drug, and one  
30  
31 216 study had insufficient statistical data and the authors did not respond to our enquiry. We thus in-  
32  
33 217 cluded a total of 39 studies in the present review. On three occasions authors provided unpublished  
34  
35 218 additional data.<sup>58-60</sup> Figure 1 shows a flowchart of the study selection process.

37  
38  
39  
40 219 (Insert Figure 1 near here)

### 43 220 **Study characteristics**

45 221 The study characteristics are summarized in Table 1. Based on outcome, 29 of the studies were aimed at  
46  
47 222 reducing negative emotional distress,<sup>41,58-85</sup> with the targeted outcomes being infertility-related distress  
48  
49 223 ( $k=10$ ), depression ( $k=21$ ), anxiety ( $k=25$ ), and marital function ( $k=5$ ). Five studies focused solely on the  
50  
51 224 outcome of pregnancy,<sup>86-90</sup> and 5 studies had included distress as well as pregnancy as outcome.<sup>78,91-94</sup> Twen-  
52  
53 225 ty-one studies were randomized controlled trials (RCTs),<sup>58,61,65-72,74,75,83,85,89-95</sup> and ten studies were non-  
54  
55 226 randomized controlled studies (NRCTs),<sup>41,59,60,76,79,80,86-88,96</sup> with most control groups receiving standardized  
56  
57 227 care or being waiting-list controls. Only three studies had included an active/attention control condition, e.g.



1  
2  
3 228 non-emotional writing or receiving an information booklet.<sup>70,71,74</sup> One study offered gift certificates to the  
4  
5 229 control group participants if they responded to the follow-up questionnaires.<sup>89</sup> Relatively few studies were  
6  
7 230 uncontrolled (UCT) (k= 8).<sup>62-64,73,77,81,82,84</sup> The reporting of the participants' medical treatment status was  
8  
9 231 inconsistent. Five studies did not provide information on treatment status (whether or not in current ART  
10  
11 232 treatment), 3 studies reported that some, but not how many, of the participants were in treatment, and 31  
12  
13 233 studies reported that their participants were currently in ART treatment, although not what kind of treatment  
14  
15 234 e.g. IUI, IVF/ICSI, or treatment cycle. The cause of infertility was also inconsistently reported, and some  
16  
17 235 participants may still have been under evaluation during the study period. Twenty-five studies had included  
18  
19 236 only women, while the remaining 14 studies had included both women and men. The included studies had  
20  
21 237 reported data for a total of 3401 participants (3064 women and 347 men). The mean age and mean duration  
22  
23 238 of infertility for intervention group participants was (32.7 yrs. SD 2.2) and (4.6 yrs. SD 2.1) and for control  
24  
25 239 group participants (32.6 yrs. SD=1.7) and (5.1 yrs. SD=3.0). The specific intervention strategies mostly em-  
26  
27 240 ployed were cognitive behavioral therapy (k=8) and mind/body intervention (k=12). The remaining studies  
28  
29 241 had used a variety of interventions, including stress management, hypnosis, art therapy, expressive writing  
30  
31 242 intervention, crisis intervention, and various types of counseling. Some studies had included more than one  
32  
33 243 approach, e.g. cognitive behavioral approaches supplemented with mind-body techniques such as relaxation.  
34  
35 244 To be categorized as mind/body intervention, a study had to use such strategies as the general approach over  
36  
37 245 the course of intervention. Thus, if studies had mainly used cognitive behavioral therapy strategies and only  
38  
39 246 incorporated other approaches, e.g., relaxation exercises, in one or two sessions, they were categorized as  
40  
41 247 cognitive behavioral therapy interventions. The number of sessions ranged from 1 to 24, lasting approxi-  
42  
43 248 mately from 20 minutes to 3 hours and the duration of psychosocial intervention ranged from 1 week to 28  
44  
45 249 months.

#### 48 250 *Attrition*

50  
51 251 A total of 15 studies reported the number of participants at baseline and then again at follow-up, and  
52  
53 252 as seen in Table 1, dropout varied across studies. Although the dropout rates in the intervention  
54  
55 253 groups were somewhat higher (Mean: 30.5% (SD: 20.2)) than in controls (24.9% (24.8)), the differ-  
56  
57 254 ence did not reach statistical significance (t(28):0.68, p=0.50). Furthermore, only four studies ex-

1  
2  
3 255 plicitly stated that the analysis was based on an intention-to-treat (ITT) approach.<sup>70,72,83,92</sup> Two addi-  
4  
5 256 tional studies used methods comparable to ITT, e.g. carrying last (baseline) observations forward or  
6  
7 257 use of multilevel linear modeling.<sup>69,97</sup> Four studies stated that there were no differences between  
8  
9 258 completers and dropouts without specifying this further,<sup>41,64,81,85</sup> and the remaining studies failed to  
10  
11 259 report whether there were dropouts or how such missing data were dealt with. The possible associa-  
12  
13 260 tion between ESs and uneven dropout in the intervention and control groups was analyzed for the  
14  
15 261 15 studies that reported dropout by regressing the difference in dropout rates on the overall ESs  
16  
17 262 across all outcomes. The result indicated that larger dropouts in the intervention group compared  
18  
19 263 were generally associated with smaller ES's (Slope = -0.02), but the association did not reach statis-  
20  
21 264 tical significance (p = 0.268).  
22  
23  
24  
25  
26  
27  
28  
29  
30  
31  
32  
33  
34  
35  
36  
37  
38  
39  
40  
41  
42  
43  
44  
45  
46  
47  
48  
49  
50  
51  
52  
53  
54  
55  
56  
57  
58  
59  
60

Table 1. Characteristics of included studies

| Author                    | Country     | Participants (N)<br>I: Intervention<br>C: Control<br>assigned<br>(final analysis)<br>(men %) | Study design <sup>a</sup> | Intervention type <sup>b</sup>              | Intervention category <sup>c</sup> | Intervention format | Number of sessions | Intervention duration (weeks) | Outcome: Psychological <sup>d</sup><br>IS: Infertility stress<br>A: Anxiety<br>D: Depression<br>MF: Marital function | Outcome: Pregnancy <sup>e</sup> (+/-) | Quality score <sup>f</sup><br>J: Jadad 0-5<br>MJ: Modified Jadad 0-12<br>J (MJ) |
|---------------------------|-------------|----------------------------------------------------------------------------------------------|---------------------------|---------------------------------------------|------------------------------------|---------------------|--------------------|-------------------------------|----------------------------------------------------------------------------------------------------------------------|---------------------------------------|---------------------------------------------------------------------------------|
| O'Moore et al. 1983       | Ireland, UK | I: 30 (22) (50 %)<br>C: 20 (20) (50 %)                                                       | NRCT                      | Autogenic training                          | MBI                                | Group               | 8                  | 8                             | D: BDI<br>A: STAI                                                                                                    | -                                     | 1 (4)                                                                           |
| Lukse 1985                | USA         | I: 29 (29 (14))                                                                              | UCT                       | Counseling                                  | Other                              | Group               | 6                  | 6                             | D: DES                                                                                                               | -                                     | 0 (3)                                                                           |
| Sarrel and DeCherney 1985 | USA         | I: 20 (10)<br>C: 20 (9)                                                                      | NRCT                      | Psychotherapeutic interview                 | Other                              | Couples             | 1                  | 1                             |                                                                                                                      | +                                     | 0 (1)                                                                           |
| Domar et al. 1990         | USA         | I: 54 (54)                                                                                   | UCT                       | Mind/Body program                           | MBI                                | Group               | 10                 | 10                            | A: STAI                                                                                                              | -                                     | 0 (3)                                                                           |
| Domar et al. 1992         | USA         | I: 52 (41)                                                                                   | UCT                       | Behavioral Medicine Program for Infertility | MBI                                | Group               | 10                 | 10                            | A: STAI                                                                                                              | -                                     | 1 (3)                                                                           |
| Galletly et al. 1996      | Australia   | I: 37 (37)                                                                                   | UCT                       | Treatment program                           | Other                              | Group               | 24                 | 24                            | D: HADS<br>A: HADS                                                                                                   | -                                     | 1 (3)                                                                           |
| McQueeney et al. 1997     | USA         | I: 20 (20)<br>C: 9 (9)                                                                       | NRCT                      | Emotion- and problem-focused therapies      | Other                              | Group               | 6                  | 6                             | IS: ISD<br>D: BDI                                                                                                    | -                                     | 3 (7)                                                                           |

|    |                           |                  |                                                      |      |                                     |       |            |       |     |                              |   |        |
|----|---------------------------|------------------|------------------------------------------------------|------|-------------------------------------|-------|------------|-------|-----|------------------------------|---|--------|
| 1  |                           |                  |                                                      |      |                                     |       |            |       |     |                              |   |        |
| 2  |                           |                  |                                                      |      |                                     |       |            |       |     |                              |   |        |
| 3  |                           |                  |                                                      |      |                                     |       |            |       |     |                              |   |        |
| 4  | Tuschen-Caffier et al.    | Germany          | I: 34 (22)<br>C: 24 (24)                             | NRCT | Cognitive-behavioral therapy        | CBT   | Couples    | 10-12 | 32  | IS: one item<br>MF: one item | - | 1 (4)  |
| 5  | 1999                      |                  |                                                      |      |                                     |       |            |       |     |                              |   |        |
| 6  |                           |                  |                                                      |      |                                     |       |            |       |     |                              |   |        |
| 7  | Domar et al.              | USA              | I: 56 (20)<br>C: 63 (14)                             | RCT  | Psychological intervention          | MBI   | Group      | 10    | 10  | D: BDI<br>A: STAI            | + | 4 (10) |
| 8  | 2000                      |                  |                                                      |      |                                     |       |            |       |     |                              |   |        |
| 9  |                           |                  |                                                      |      |                                     |       |            |       |     |                              |   |        |
| 10 | Terzioglu                 | Turkey           | I: 60 (60)<br>(50 %)<br>C: 60 (60)<br>(50 %)         | RCT  | Counseling                          | Other | Individual | 5     | 5   | D: BDI<br>A: STAI            | + | 2 (5)  |
| 11 | 2001                      |                  |                                                      |      |                                     |       |            |       |     |                              |   |        |
| 12 |                           |                  |                                                      |      |                                     |       |            |       |     |                              |   |        |
| 13 |                           |                  |                                                      |      |                                     |       |            |       |     |                              |   |        |
| 14 | Hosaka et al.             | Japan            | I: 37 (37)<br>C: 37 (37)                             | NRCT | Structured intervention             | MBI   | Group      | 5     | 5   |                              | + | 3 (6)  |
| 15 | 2002                      |                  |                                                      |      |                                     |       |            |       |     |                              |   |        |
| 16 | McNaughton-Cassill et al. | USA              | I: 43 (43)<br>(39.5 %)<br>C: 37 (37)<br>(48.6 %)     | NRCT | Couples support                     | CBT   | Couples    | 6     | 3   | D: BDI<br>A: BAI             | - | 2 (5)  |
| 17 | 2002                      |                  |                                                      |      |                                     |       |            |       |     |                              |   |        |
| 18 |                           |                  |                                                      |      |                                     |       |            |       |     |                              |   |        |
| 19 | Emery et al.              | Switzerland      | I: 158 (110)<br>(34.8 %)<br>C: 152 (131)<br>(42.8 %) | RCT  | Pre-IVF counseling                  | Other | Couples    | 1     | 1   | D: BDI<br>A: STAI            | - | 3 (6)  |
| 20 | 2003                      |                  |                                                      |      |                                     |       |            |       |     |                              |   |        |
| 21 |                           |                  |                                                      |      |                                     |       |            |       |     |                              |   |        |
| 22 |                           |                  |                                                      |      |                                     |       |            |       |     |                              |   |        |
| 23 | Lee                       | Taiwan           | I: 64 (64)<br>C: 68(68)                              | RCT  | Nursing crisis intervention program | MBI   | Individual | 7     | 7   | D: SDS<br>A: STAI            | - | 1 (4)  |
| 24 | 2003                      |                  |                                                      |      |                                     |       |            |       |     |                              |   |        |
| 25 |                           |                  |                                                      |      |                                     |       |            |       |     |                              |   |        |
| 26 |                           |                  |                                                      |      |                                     |       |            |       |     |                              |   |        |
| 27 |                           |                  |                                                      |      |                                     |       |            |       |     |                              |   |        |
| 28 |                           |                  |                                                      |      |                                     |       |            |       |     |                              |   |        |
| 29 | De Klerk et al.           | The Netherlands  | I: 22 (18)<br>C: 22 (15)                             | RCT  | Counseling                          | Other | Group      | 3     | 4-5 | D: HADS<br>A: HADS           | + | 3 (6)  |
| 30 | 2005                      |                  |                                                      |      |                                     |       |            |       |     |                              |   |        |
| 31 |                           |                  |                                                      |      |                                     |       |            |       |     |                              |   |        |
| 32 | Schmidt et al.            | Denmark          | I: 13 (13)<br>C: 435 (435)                           | NRCT | Stress management                   | Other | Group      | 5     | 6   | IS: COMPI                    | - | 1 (4)  |
| 33 | 2005                      |                  |                                                      |      |                                     |       |            |       |     |                              |   |        |
| 34 | Chan et al.               | Hong Kong, China | I: 101 (69)<br>C: 126 (115)                          | RCT  | The Eastern body-mind intervention  | MBI   | Group      | 4     | 4   | A: STAI                      | - | 3 (7)  |
| 35 | 2006                      |                  |                                                      |      |                                     |       |            |       |     |                              |   |        |
| 36 |                           |                  |                                                      |      |                                     |       |            |       |     |                              |   |        |
| 37 | Levitas et al.            | Israel           | I: 89 (89)<br>C: 96 (96)                             | NRCT | Hypnosis                            | MBI   | Individual | 1     | 1   |                              | + | 0 (1)  |
| 38 | 2006                      |                  |                                                      |      |                                     |       |            |       |     |                              |   |        |
| 39 |                           |                  |                                                      |      |                                     |       |            |       |     |                              |   |        |
| 40 |                           |                  |                                                      |      |                                     |       |            |       |     |                              |   |        |
| 41 |                           |                  |                                                      |      |                                     |       |            |       |     |                              |   |        |
| 42 |                           |                  |                                                      |      |                                     |       |            |       |     |                              |   |        |
| 43 |                           |                  |                                                      |      |                                     |       |            |       |     |                              |   |        |
| 44 |                           |                  |                                                      |      |                                     |       |            |       |     |                              |   |        |
| 45 |                           |                  |                                                      |      |                                     |       |            |       |     |                              |   |        |
| 46 |                           |                  |                                                      |      |                                     |       |            |       |     |                              |   |        |
| 47 |                           |                  |                                                      |      |                                     |       |            |       |     |                              |   |        |
| 48 |                           |                  |                                                      |      |                                     |       |            |       |     |                              |   |        |
| 49 |                           |                  |                                                      |      |                                     |       |            |       |     |                              |   |        |

|    |                      |          |              |     |              |       |            |          |    |            |   |       |
|----|----------------------|----------|--------------|-----|--------------|-------|------------|----------|----|------------|---|-------|
| 1  |                      |          |              |     |              |       |            |          |    |            |   |       |
| 2  |                      |          |              |     |              |       |            |          |    |            |   |       |
| 3  |                      |          |              |     |              |       |            |          |    |            |   |       |
| 4  | Nilforooshan et al.  | Iran     | I: 30 (30)   | RCT | Cognitive-   | CBT   | Group      | 6        | 6  | D: BDI     | - | 2 (6) |
| 5  | 2006                 |          | (50 %)       |     | behavioral   |       |            |          |    | A: BAI     |   |       |
| 6  |                      |          | C: 30 (30)   |     | counseling   |       |            |          |    |            |   |       |
| 7  |                      |          | (50 %)       |     |              |       |            |          |    |            |   |       |
| 8  | Tuil et al.          | The      | I: 108 (102) | RCT | Internet-    | Other | Individual | Infinite | 2  | D: BDI     | - | 3 (6) |
| 9  | 2007                 | Nether-  | (50 %)       |     | based health |       |            |          |    | A: STAI    |   |       |
| 10 |                      | lands    | C: 96 (78)   |     | record       |       |            |          |    |            |   |       |
| 11 |                      |          | (48.7 %)     |     |              |       |            |          |    |            |   |       |
| 12 | Cousineau et al.     | USA      | I: 96 (49)   | RCT | Psycho-      | Other | Online     | 1-2      | 4  | IS: FPI    | - | 4 (8) |
| 13 | 2008                 |          | C: 92 (49)   |     | educational  |       |            |          |    | MF: RDAS   |   |       |
| 14 |                      |          |              |     | support      |       |            |          |    |            |   |       |
| 15 | Faramarzi et al.     | Iran     | I: 42 (29)   | RCT | Cognitive-   | CBT   | Group      | 10       | 10 | D: BDI     | - | 3 (6) |
| 16 | 2008                 |          | C: 40 (30)   |     | behavioral   |       |            |          |    | A: Cattell |   |       |
| 17 |                      |          |              |     | therapy      |       |            |          |    |            |   |       |
| 18 | Lancastle and Boivin | Wales,   | I:28 (28)    | RCT | Brief coping | Other | Individual | 14       | 2  | IS: CIQ    | - | 4 (8) |
| 19 | 2008                 | UK       | C: 27 (27)   |     | intervention |       |            |          |    |            |   |       |
| 20 | Noorbala et al.      | Iran     | I: 288 (288) | UCT | Cognitive-   | CBT   | Group      |          | 24 | D: BDI     | - | 3 (8) |
| 21 | 2008                 |          | (50 %)       |     | behavioral   |       |            |          |    |            |   |       |
| 22 |                      |          |              |     | therapy      |       |            |          |    |            |   |       |
| 23 | Mori                 | Japan    | I: 85 (85)   | RCT | Stress man-  | Other | Individual | 3        | 12 | D: HADS    | - | 4 (8) |
| 24 | 2009                 |          | C: 40 (40)   |     | agement      |       |            |          |    | A: HADS    |   |       |
| 25 | Panagopoulou et al.  | England, | I: 50 (50)   | RCT | Expressive   | Other | Individual | 3        | 1  | IS: ISS    | - | 3 (7) |
| 26 | 2009                 | UK       | C: 98 (98)   |     | writing in-  |       |            |          |    | A: STAI    |   |       |
| 27 |                      |          |              |     | tervention   |       |            |          |    |            |   |       |
| 28 | Haemmerli et al.     | Switzer- | I: 60 (46)   | RCT | Coaching     | Other | Online     | 13       | 8  | IS: IDS    | - | 3 (6) |
| 29 | 2010                 | land     | C: 64 (41)   |     | and support  |       |            |          |    | D: CES-D   |   |       |
| 30 |                      |          |              |     |              |       |            |          |    | A: STAI    |   |       |
| 31 | Sexton et al.        | USA      | I: 21 (15)   | RCT | Web-based    | Other | Individual |          | 2  | IS: FPI    | - | 3 (6) |
| 32 | 2010                 |          | C: 22 (16)   |     | copying with |       |            |          |    |            |   |       |
| 33 |                      |          |              |     | infertility  |       |            |          |    |            |   |       |
| 34 | Domar et al.         | USA      | I: 46 (46)   | RCT | Mind/body    | MBI   | Group      | 10       | 10 |            | + | 4 (6) |
| 35 | 2011                 |          | C: 51(51)    |     | program for  |       |            |          |    |            |   |       |
| 36 |                      |          |              |     | infertility  |       |            |          |    |            |   |       |
| 37 | Hughes and Mann de   | Canada   | I: 21 (21)   | UCT | Art therapy  | Other | Group      | 8 (2hrs) | 8  | D: BDI     | - | 0 (2) |
| 38 | Silva                |          |              |     |              |       |            |          |    | A: BAI     |   |       |
| 39 |                      |          |              |     |              |       |            |          |    |            |   |       |
| 40 |                      |          |              |     |              |       |            |          |    |            |   |       |
| 41 |                      |          |              |     |              |       |            |          |    |            |   |       |
| 42 |                      |          |              |     |              |       |            |          |    |            |   |       |
| 43 |                      |          |              |     |              |       |            |          |    |            |   |       |
| 44 |                      |          |              |     |              |       |            |          |    |            |   |       |
| 45 |                      |          |              |     |              |       |            |          |    |            |   |       |
| 46 |                      |          |              |     |              |       |            |          |    |            |   |       |
| 47 |                      |          |              |     |              |       |            |          |    |            |   |       |
| 48 |                      |          |              |     |              |       |            |          |    |            |   |       |
| 49 |                      |          |              |     |              |       |            |          |    |            |   |       |

|    |                    |                |              |      |                                                      |       |            |             |    |                   |   |       |
|----|--------------------|----------------|--------------|------|------------------------------------------------------|-------|------------|-------------|----|-------------------|---|-------|
| 1  |                    |                |              |      |                                                      |       |            |             |    |                   |   |       |
| 2  |                    |                |              |      |                                                      |       |            |             |    |                   |   |       |
| 3  |                    |                |              |      |                                                      |       |            |             |    |                   |   |       |
| 4  | 2011               |                |              |      |                                                      |       |            |             |    |                   |   |       |
| 5  |                    |                |              |      |                                                      |       |            |             |    |                   |   |       |
| 6  | Chan et al.        | Hong           | I: 141 (141) | RCT  | Integrative                                          | MBI   | Group      | 4 (3hrs)    | 4  | A: STAI           | + | 3 (6) |
| 7  | 2012               | Kong,<br>China | C: 110 (110) |      | body-mind-<br>spirit inter-<br>vention               |       |            |             |    | MF: C-KMS         |   |       |
| 8  |                    |                |              |      |                                                      |       |            |             |    |                   |   |       |
| 9  |                    |                |              |      |                                                      |       |            |             |    |                   |   |       |
| 10 | Gorayeb et al.     | Brazil         | I: 93 (93)   | RCT  | Brief cogni-<br>tive-<br>behavioral<br>intervention  | CBT   | Group      | 5 (2hrs)    | 5  |                   | + | 1 (4) |
| 11 | 2012               |                | C: 95 (95)   |      |                                                      |       |            |             |    |                   |   |       |
| 12 |                    |                |              |      |                                                      |       |            |             |    |                   |   |       |
| 13 |                    |                |              |      |                                                      |       |            |             |    |                   |   |       |
| 14 | Koszycki et al.    | Canada         | I: 31 (23)   | UCT  | Interpersonal<br>and support-<br>ive therapy         | Other | Individual | 12 (50min)  | 12 | IS: FPI           | - | 3 (7) |
| 15 | 2012               |                |              |      |                                                      |       |            |             |    | D: BDI<br>HAM-D   |   |       |
| 16 |                    |                |              |      |                                                      |       |            |             |    |                   |   |       |
| 17 | Matthiesen et al.  | Denmark        | I: 42 (15)   | RCT  | Expressive<br>writing in-<br>tervention              | Other | Individual | 3 (20min)   | 1  | IS: COMPI         | - | 4 (8) |
| 18 | 2012               |                | C: 40 (16)   |      |                                                      |       |            |             |    |                   |   |       |
| 19 |                    |                |              |      |                                                      |       |            |             |    |                   |   |       |
| 20 | Mosalanejad et al. | Iran           | I: 32 (32)   | RCT  | Cognitive-<br>behavioral<br>treatment                | CBT   | Group      | 12 (2hrs)   | 12 | D: DASS           | - | 1 (4) |
| 21 | 2012               |                | C: 33 (33)   |      |                                                      |       |            |             |    | A: DASS           |   |       |
| 22 |                    |                |              |      |                                                      |       |            |             |    |                   |   |       |
| 23 | Mosalanejad et al. | Iran           | I: 16 (16)   | NRCT | Cognitive-<br>behavioral<br>therapy                  | CBT   | Group      | 15 (1,5hrs) | 16 | D: DASS           | - | 2 (5) |
| 24 | 2012b              |                | C: 15 (15)   |      |                                                      |       |            |             |    | A: DASS           |   |       |
| 25 |                    |                |              |      |                                                      |       |            |             |    |                   |   |       |
| 26 | Catoire et al.     | France         | I: 50 (50)   | UCT  | Hypnosis                                             | MBI   | Individual | 4           | 1  | A: STAI           | - | 4 (7) |
| 27 | 2013               |                |              |      |                                                      |       |            |             |    |                   |   |       |
| 28 | Galhardo et al.    | Portugal       | I: 55 (55)   | NRCT | Mindful-<br>ness-based<br>program for<br>infertility | MBI   | Group      | 10 (2hrs)   | 10 | IS: ISE           | - | 1 (4) |
| 29 | 2013               |                | C: 37 (37)   |      |                                                      |       |            |             |    | D: BDI<br>A: STAI |   |       |
| 30 |                    |                |              |      |                                                      |       |            |             |    |                   |   |       |
| 31 | Vizheh et al.      | Iran           | I: 86 (86)   | RCT  | Marital<br>counseling                                | Other | Group      | 3 (1.5hrs)  | 3  | MF: MSQ           | + | 4 (8) |
| 32 | 2013               |                | (50 %)       |      |                                                      |       |            |             |    |                   |   |       |
| 33 |                    |                | C: 94 (86)   |      |                                                      |       |            |             |    |                   |   |       |
| 34 |                    |                | (54.7 %)     |      |                                                      |       |            |             |    |                   |   |       |
| 35 |                    |                |              |      |                                                      |       |            |             |    |                   |   |       |
| 36 |                    |                |              |      |                                                      |       |            |             |    |                   |   |       |
| 37 |                    |                |              |      |                                                      |       |            |             |    |                   |   |       |

a) RCT Randomized controlled trial, NRCT non-randomized controlled trial, UCT uncontrolled pre-post trial, NR Not reported.

b) Self-reported intervention type.

c) Intervention type: CBT (Cognitive behavioral therapy); MBI (Mind/body intervention): mindfulness, yoga, relaxation, imagery, hypnosis etc.; Other: all other intervention types, e.g. counseling, psycho-education, supportive therapy, expressive writing intervention, brief therapy, emotion and problem focused therapy, and narrative therapy.

1  
2  
3  
4 272  
5 273  
6 274  
7 275  
8 276  
9 277  
10 278  
11 279  
12 280  
13  
14 281  
15  
16  
17  
18  
19  
20  
21  
22  
23  
24  
25  
26  
27  
28  
29  
30  
31  
32  
33  
34  
35  
36  
37  
38  
39  
40  
41  
42  
43  
44  
45  
46  
47  
48  
49

- d) Outcome measures: **Infertility stress:** COMPI the Copenhagen Multi-centre Psychosocial Infertility Problem Stress scale, FPI Fertility Problem Index, *ISE* Infertility Self-efficacy Scale, *CIQ* the Coping with Infertility Questionnaire, *ISS* the Infertility and Strain Scale, *IDS* Infertility Distress Scale **Depression:** *BDI* the Beck Depression Inventory, *HADS* the Hospital Anxiety and Depression Scale, *CES-D* the Center for Epidemiologic Studies Depression – short version, *SDS* Zung’s Self-administered Depression Scale, *DASS* the Depression and Anxiety Stress Scale - depression **Anxiety:** *STAI* Spielberger State-Trait Anxiety Inventory, *BAI* the Beck Anxiety Inventory, *HAM-D* Hamilton Depression Rating Scale – subscale anxiety, *DASS* the Depression and Anxiety Stress Scale – anxiety, *Cattell* Cattell Anxiety Inventory **Marital function:** *C-KMS* Kansas Marital Satisfaction Scale – Chinese version *RDAS* Revised Dyadic Adjustment Scale – dyadic cohesion subscale, *MSQ* Marital Satisfaction Questionnaire.
- e) *Pregnancy* is defined as a clinical pregnancy; when heartbeat of the fetal sac is evident in the uterus with an ultrasound scan .
- f) *Jadad range 0-5* an assessment tool rating the quality and methodology of the studies included<sup>37</sup> and the *modified Jadad range 0-11 (total score)* included additional points for: inclusion of a control group, pre-post data, blinding of participants or researchers, use of standardized and reliable outcome measures and report of pre-post correlations.

For peer review only

1  
2 282 *Quality ratings*  
3

4 283 All included studies were methodologically assessed with both the original Jadad scale and the ad-  
5  
6 284 ditional methodological criteria. The original Jadad scores ranged from 0 to 4 with a mean of 2.28  
7  
8 285 (SD: 1.36), and the modified total quality scores ranged from 1 to 10 with a mean of 5.36 (SD:  
9  
10 286 2.05). The main methodological issue was that only very few studies attempted to blind or mask the  
11  
12 287 intervention conditions to either patients or researchers. The quality ratings for each criterion for  
13  
14 288 each study and total scores are shown in Table 2.  
15  
16  
17  
18  
19  
20  
21  
22  
23  
24  
25  
26  
27  
28  
29  
30  
31  
32  
33  
34  
35  
36  
37  
38  
39  
40  
41  
42  
43  
44  
45  
46  
47  
48  
49  
50  
51  
52  
53  
54  
55  
56  
57  
58  
59  
60



1  
2  
3  
4 289**Table 2 Modified Jadad scores (original Jadad criteria + 6 additional criteria)**

| Study                                       | Jadad criteria |              |                           |                            |                       |                            |                       | Additional criteria |                          |                     |                        |                                   |                      | Jadad        | Total        |
|---------------------------------------------|----------------|--------------|---------------------------|----------------------------|-----------------------|----------------------------|-----------------------|---------------------|--------------------------|---------------------|------------------------|-----------------------------------|----------------------|--------------|--------------|
|                                             | 1              | 2            | 3                         | 4                          | 5                     | 6                          | 7                     | a                   | b                        | C                   | d                      | e                                 | f                    |              |              |
|                                             | Randomized     | Double blind | Withdrawals and drop-outs | Randomization (evaluation) | Blinding (evaluation) | Randomization (evaluation) | Blinding (evaluation) | Control group       | Pre- and post-assessment | Blinding (patients) | Blinding (researchers) | Standardized and reliable outcome | Pre-post correlation | Jadad scores | Total scores |
| O'Moore et al., 1983                        | 0              | 0            | 1                         | 0                          | 0                     | 0                          | 0                     | 1                   | 1                        | 0                   | 0                      | 1                                 | 0                    | 1            | 4            |
| Lukse, 1985                                 | 0              | 0            | 0                         | 0                          | 0                     | 0                          | 0                     | 0                   | 1                        | 0                   | 0                      | 1                                 | 1                    | 0            | 3            |
| Sarrel et al., 1985                         | 0              | 0            | 0                         | 0                          | 0                     | 0                          | 0                     | 1                   | 0                        | 0                   | 0                      | 0                                 | 0                    | 0            | 1            |
| Domar et al., 1990                          | 0              | 0            | 0                         | 0                          | 0                     | 0                          | 0                     | 0                   | 1                        | 0                   | 0                      | 1                                 | 1                    | 0            | 3            |
| Domar et al., 1992                          | 0              | 0            | 1                         | 0                          | 0                     | 0                          | 0                     | 0                   | 1                        | 0                   | 0                      | 1                                 | 0                    | 1            | 3            |
| Galletly et al., 1996                       | 0              | 0            | 1                         | 0                          | 0                     | 0                          | 0                     | 0                   | 1                        | 0                   | 0                      | 1                                 | 0                    | 1            | 3            |
| McQueeney et al., 1997                      | 1              | 0            | 0                         | 1                          | 1                     | 0                          | 0                     | 1                   | 1                        | 1                   | 0                      | 1                                 | 0                    | 3            | 7            |
| Tuschen-Caffier et al., 1999                | 0              | 0            | 1                         | 0                          | 0                     | 0                          | 0                     | 1                   | 1                        | 0                   | 0                      | 1                                 | 0                    | 1            | 4            |
| Domar et al., 2000                          | 1              | 1            | 1                         | 1                          | 0                     | 0                          | 0                     | 1                   | 1                        | 1                   | 1                      | 1                                 | 1                    | 4            | 10           |
| Terzioglu, 2001                             | 1              | 0            | 1                         | 0                          | 0                     | 0                          | 0                     | 1                   | 1                        | 0                   | 0                      | 1                                 | 0                    | 2            | 5            |
| Hosaka et al., 2002                         | 1              | 0            | 1                         | 1                          | 0                     | 0                          | 0                     | 1                   | 1                        | 0                   | 0                      | 1                                 | 0                    | 3            | 6            |
| McNaughton-Casill et al., 2002 <sup>a</sup> | 1              | 0            | 1                         | 0                          | 0                     | 0                          | 0                     | 1                   | 1                        | 0                   | 0                      | 1                                 | 0                    | 2            | 5            |
| Emery et al., 2003                          | 1              | 0            | 1                         | 1                          | 0                     | 0                          | 0                     | 1                   | 1                        | 0                   | 0                      | 1                                 | 0                    | 3            | 6            |
| Lee et al., 2003                            | 1              | 0            | 0                         | 0                          | 0                     | 0                          | 0                     | 1                   | 1                        | 0                   | 0                      | 1                                 | 0                    | 1            | 4            |

1  
2  
3  
4  
5  
6  
7  
8  
9  
10  
11  
12  
13  
14  
15  
16  
17  
18  
19  
20  
21  
22  
23  
24  
25  
26  
27  
28  
29  
30  
31  
32  
33  
34  
35  
36  
37  
38  
39  
40  
41  
42  
43  
44  
45  
46  
47  
48  
49

|                                    |   |   |   |   |   |   |   |   |   |   |   |   |   |   |   |
|------------------------------------|---|---|---|---|---|---|---|---|---|---|---|---|---|---|---|
| De Klerk et al., 2005              | 1 | 0 | 1 | 1 | 0 | 0 | 0 | 1 | 1 | 0 | 0 | 1 | 0 | 3 | 6 |
| Schmidt et al., 2005               | 0 | 0 | 1 | 0 | 0 | 0 | 0 | 1 | 1 | 0 | 0 | 1 | 0 | 1 | 4 |
| Chan et al., 2006                  | 1 | 0 | 1 | 1 | 0 | 0 | 0 | 1 | 1 | 0 | 0 | 1 | 1 | 3 | 7 |
| Levitas et al., 2006               | 0 | 0 | 0 | 0 | 0 | 0 | 0 | 1 | 0 | 0 | 0 | 0 | 0 | 0 | 1 |
| Nilforooshan et al., 2006          | 1 | 0 | 1 | 0 | 0 | 0 | 0 | 1 | 1 | 0 | 0 | 1 | 1 | 2 | 6 |
| Tuil et al., 2007                  | 1 | 0 | 1 | 1 | 0 | 0 | 0 | 1 | 1 | 0 | 0 | 1 | 0 | 3 | 6 |
| Cousineau et al., 2008             | 1 | 0 | 1 | 1 | 1 | 0 | 0 | 1 | 1 | 1 | 0 | 1 | 0 | 4 | 8 |
| Faramarzi et al., 2008             | 1 | 0 | 1 | 0 | 0 | 0 | 0 | 1 | 1 | 0 | 0 | 1 | 1 | 2 | 6 |
| Lancastle and Boivin, 2008         | 1 | 0 | 1 | 1 | 1 | 0 | 0 | 1 | 1 | 1 | 0 | 1 | 0 | 4 | 8 |
| Noorbala et al., 2008 <sup>a</sup> | 1 | 0 | 0 | 1 | 1 | 0 | 0 | 1 | 1 | 0 | 0 | 1 | 0 | 3 | 6 |
| Mori, 2009                         | 1 | 0 | 1 | 1 | 1 | 0 | 0 | 1 | 1 | 1 | 0 | 1 | 0 | 4 | 8 |
| Panagopoulou et al., 2009          | 1 | 0 | 1 | 0 | 1 | 0 | 0 | 1 | 1 | 1 | 0 | 1 | 0 | 3 | 7 |
| Haemmerli et al., 2010             | 1 | 0 | 1 | 1 | 0 | 0 | 0 | 1 | 1 | 0 | 0 | 1 | 0 | 3 | 6 |
| Sexton et al., 2010                | 1 | 0 | 1 | 1 | 0 | 0 | 0 | 1 | 1 | 0 | 0 | 1 | 0 | 3 | 6 |
| Domar et al., 2011                 | 1 | 0 | 1 | 1 | 1 | 0 | 0 | 1 | 0 | 0 | 1 | 0 | 0 | 4 | 6 |
| Hughes and Mann de Silva, 2011     | 0 | 0 | 0 | 0 | 0 | 0 | 0 | 0 | 1 | 0 | 0 | 1 | 0 | 0 | 2 |
| Chan et al. 2012                   | 1 | 0 | 1 | 1 | 0 | 0 | 0 | 1 | 1 | 0 | 0 | 1 | 0 | 3 | 6 |
| Gorayeb et al., 2012               | 1 | 0 | 1 | 1 | 0 | 0 | 0 | 1 | 0 | 0 | 0 | 0 | 0 | 3 | 4 |
| Koszycki et al., 2012              | 1 | 0 | 1 | 1 | 0 | 0 | 0 | 1 | 1 | 1 | 0 | 1 | 0 | 3 | 7 |
| Matthiesen et al., 2012            | 1 | 0 | 1 | 1 | 1 | 0 | 0 | 1 | 1 | 1 | 0 | 1 | 0 | 4 | 8 |

1  
2  
3  
4  
5  
6  
7  
8  
9  
10  
11  
12  
13  
14  
15  
16  
17  
18  
19  
20  
21  
22  
23  
24  
25  
26  
27  
28  
29  
30  
31  
32  
33  
34  
35  
36  
37  
38  
39  
40  
41  
42  
43  
44  
45  
46  
47  
48  
49

|                                   |          |          |          |          |          |          |          |          |          |   |          |          |   |          |          |
|-----------------------------------|----------|----------|----------|----------|----------|----------|----------|----------|----------|---|----------|----------|---|----------|----------|
| Mosalanejad et al., 2012          | <b>1</b> | <b>0</b> | <b>0</b> | <b>0</b> | <b>0</b> | <b>0</b> | <b>0</b> | <b>1</b> | <b>1</b> | 0 | 0        | <b>1</b> | 0 | <b>1</b> | <b>4</b> |
| Mosalanejad et al., 2012b         | <b>0</b> | <b>0</b> | <b>1</b> | <b>0</b> | <b>0</b> | <b>0</b> | <b>0</b> | <b>1</b> | <b>1</b> | 0 | 0        | <b>1</b> | 0 | <b>1</b> | <b>4</b> |
| Catoire et al., 2013 <sup>a</sup> | <b>0</b> | 0        | <b>1</b> | 0 | <b>1</b> | <b>1</b> | 0 | <b>0</b> | <b>3</b> |
| Galhardo et al., 2013             | <b>0</b> | <b>0</b> | <b>1</b> | <b>0</b> | <b>0</b> | <b>0</b> | <b>0</b> | <b>1</b> | <b>1</b> | 0 | 0        | <b>1</b> | 0 | <b>1</b> | <b>4</b> |
| Vizeh et al., 2013                | <b>1</b> | <b>0</b> | <b>1</b> | <b>1</b> | <b>1</b> | <b>0</b> | <b>0</b> | <b>1</b> | <b>1</b> | 0 | <b>1</b> | <b>1</b> | 0 | <b>4</b> | <b>8</b> |

Criteria 1 – 7 in bold font are the original Jadad scores, a – f are the additional criteria. **1) Was the study described as randomized; 2) Was the study described as double blind; 3) Was there a description of withdrawals and dropouts; 4) The method of randomization was described, and appropriate; 5) The method of blinding was described, and appropriate; 6) The method of randomization was described, but in inappropriate; 7) The method of blinding was described, but inappropriate;** a) The study included a control group; b) The study included pre- and post-assessment; c) There was an attempt of blinding or masking the active condition to patients; d) There was an attempt of blinding the researchers e) The study used standardized and reliable outcome measures; f) The study reported pre-post correlation.

<sup>a</sup>) In these studies, the original Jadad score and the modified quality score relate to the methodological quality of the published study. For the purpose of the meta-analyses, some of the groups were collapsed or omitted, e.g. if they compared two or more interventions or compared a psychological intervention with a medical treatment, thereby changing design status as shown in Table 1.

1  
2 298 **Effects of psychosocial intervention**  
3

4  
5 299 The results of the meta-analyses are shown in Table 3.  
6

7  
8 300 *Pregnancy rates*  
9

10 301 A statistically significant and robust effect size (RR = 2.01) was found for the 10 studies which had  
11  
12 302 investigated effects of psychosocial intervention on clinical pregnancy rates, with the chance of  
13  
14 303 becoming pregnant being doubled in the intervention group. Adjusting for possible publication bias,  
15  
16 304 the risk ratio was somewhat lower (1.57). A forest plot of the effects of psychological intervention  
17  
18 305 on pregnancy outcomes are shown in Figure 2.  
19

20  
21  
22 306 (Insert Figure 2 near here)  
23

24  
25 307 *Combined psychological outcomes*  
26

27 308 Combining the effect sizes of the 35 studies which had included one or more psychological out-  
28  
29 309 comes revealed a statistically significant, robust<sup>51</sup>, medium<sup>39</sup> effect size ( $g = 0.59$ ). The results indi-  
30  
31 310 cated possible publication bias (skewed funnel plot, Egger's test ( $p < 0.05$ )) in favor of larger pub-  
32  
33 311 lished ESs. When imputing missing ESs,<sup>52</sup> the resulting adjusted pooled ES was smaller (0.31), but  
34  
35 312 remained statistically significant. Taking gender into consideration, the ES (0.51) remained statisti-  
36  
37 313 cally significant for women, still suggesting a robust effect. The ES was smaller for men (0.34) and  
38  
39 314 did not reach statistical significance. A forest plot of the effects of psychological intervention on the  
40  
41 315 combined psychological outcomes is shown in Figure 3.  
42  
43

44  
45  
46 316 (Insert Figure 3 near here)  
47

48  
49 317 *Infertility-related distress*  
50

51 318 Only ten studies had included infertility-related distress as an outcome. Small ESs were found for  
52  
53 319 women and men combined (0.24) and women alone (0.37), and did not reach statistical signifi-  
54  
55 320 cance.  
56  
57  
58  
59  
60

**Table 3. Results of meta-analyses of effects of psychosocial intervention on psychological outcomes and pregnancy rates among infertile couples**

|                                            | Sample size       |      | Heterogeneity <sup>a</sup> |    |        |                | Global effect sizes   |              |        | Failsafe N <sup>c</sup> | Criterion <sup>d</sup> |
|--------------------------------------------|-------------------|------|----------------------------|----|--------|----------------|-----------------------|--------------|--------|-------------------------|------------------------|
|                                            | K                 | N    | Q                          | df | P      | I <sup>2</sup> | Hedges g <sup>b</sup> | 95 % CI      | p      |                         |                        |
| <b>MAIN EFFECTS</b>                        |                   |      |                            |    |        |                |                       |              |        |                         |                        |
| Pregnancy                                  |                   |      |                            |    |        |                |                       |              |        |                         |                        |
| Pregnancy, women                           | 10                | 1324 | 22.0                       | 9  | =0.009 | 59.0           | 2.01 (RR)             | 1.48 – 2.73  | <0.001 | 130                     | 60                     |
| <i>Adjusted for publication bias</i>       | (13)              | -    | -                          | -  | -      | -              | 1.57 (RR)             | 1.10 – 2.25  | <0.05  | -                       | -                      |
| Psych. combined, women+men                 | 35                | 2746 | 259.2                      | 34 | <0.001 | 86.9           | 0.59                  | 0.38 – 0.80  | <0.001 | 1552                    | 185                    |
| <i>Adjusted for publication bias</i>       | (42) <sup>e</sup> | -    | -                          | -  | -      | -              | 0.31                  | 0.07 – 0.56  | <0.05  | -                       | -                      |
| Psych. combined, women                     | 28                | 2076 | 130.8                      | 27 | <0.001 | 76.4           | 0.51                  | 0.32 – 0.70  | <0.001 | 798                     | 150                    |
| <i>Adjusted for publication bias</i>       | (34) <sup>e</sup> | -    | -                          | -  | -      | -              | 0.30                  | 0.09 – 0.51  | <0.05  | -                       | -                      |
| Psych. combined, men                       | 7                 | 347  | 8.9                        | 6  | =0.178 | 32.8           | 0.34                  | 0.08 – 0.59  | =0.010 | 12                      | 45                     |
| Between-group <sup>f</sup> (women vs. men) | 35                | 2110 | 1.2                        | 1  | Ns     | -              | -                     | -            | -      | -                       | -                      |
| Infertility distress                       |                   |      |                            |    |        |                |                       |              |        |                         |                        |
| Infertility distress, women+men            | 10                | 615  | 21.4                       | 9  | =0.01  | 58.0           | 0.24                  | -0.02 – 0.50 | ns     | -                       | -                      |
| Infertility distress, women                | 6                 | 371  | 17.8                       | 5  | =0.003 | 71.8           | 0.37                  | -0.06 – 0.79 | ns     | -                       | -                      |
| Depressive symptoms                        |                   |      |                            |    |        |                |                       |              |        |                         |                        |
| Depression symp., women+men                | 21                | 1558 | 367.5                      | 20 | <0.001 | 94.6           | 1.00                  | 0.54 – 1.45  | <0.001 | 1022                    | 115                    |
| <i>Adjusted for publication bias</i>       | (25) <sup>e</sup> | -    | -                          | -  | -      | -              | 0.31                  | -0.20 – 0.84 | ns     | -                       | -                      |
| Depressive symp., women                    | 17                | 992  | 107.7                      | 16 | <0.001 | 85.1           | 0.73                  | 0.41 – 1.06  | <0.001 | 393                     | 95                     |
| <i>Adjusted for publication bias</i>       | (23) <sup>e</sup> | -    | -                          | -  | -      | -              | 0.29                  | -0.07 – 0.65 | ns     | -                       | -                      |
| Depressive symp., men                      | 5                 | 243  | 1.9                        | 4  | =0.749 | 0.00           | 0.13                  | -0.11 – 0.37 | ns     | -                       | -                      |

|                                                    |                   |      |       |    |        |      |           |              |         |     |     |
|----------------------------------------------------|-------------------|------|-------|----|--------|------|-----------|--------------|---------|-----|-----|
| Between-group <sup>f</sup> (women vs. men)         | 22                | 1235 | 8.5   | 1  | <0.004 | -    | -         | -            | -       | -   | -   |
| <b>Anxiety</b>                                     |                   |      |       |    |        |      |           |              |         |     |     |
| Anxiety, women+men                                 | 25                | 2159 | 144.4 | 24 | <0.001 | 83.4 | 0.51      | 0.31 – 0.71  | <0.001  | 760 | 135 |
| <i>Adjusted for publication bias</i>               | (29) <sup>e</sup> | -    | -     | -  | -      | -    | 0.31      | 0.07 – 0.54  | <0.05   | -   | -   |
| Anxiety, women                                     | 23                | 1737 | 114.3 | 22 | <0.001 | 80.8 | 0.53      | 0.32 – 0.73  | <0.001  | 631 | 125 |
| <i>Adjusted for publication bias</i>               | (27) <sup>e</sup> | -    | -     | -  | -      | -    | 0.32      | 0.08 – 0.57  | <0.05   | -   | -   |
| Anxiety, men                                       | 5                 | 246  | 8.7   | 4  | =0.070 | 53.8 | 0.32      | -0.04 – 0.67 | ns      | -   | -   |
| Between-group <sup>f</sup> (women vs. men)         | 28                | 1983 | 1.0   | 1  | Ns     | -    | -         | -            | -       | -   | -   |
| <b>Marital function</b>                            |                   |      |       |    |        |      |           |              |         |     |     |
| Marital function, women+men                        | 5                 | 633  | 14.6  | 4  | =0.006 | 72.6 | 0.09      | -0.23 – 0.41 | ns      | -   | -   |
| Marital function, women                            | 4                 | 587  | 14.5  | 3  | =0.002 | 79.3 | 0.08      | -0.30 – 0.46 | ns      | -   | -   |
| <b>MODERATOR ANALYSES</b>                          |                   |      |       |    |        |      |           |              |         |     |     |
| <b>Pregnancy (women)</b>                           |                   |      |       |    |        |      |           |              |         |     |     |
| <b>Study design<sup>h</sup></b>                    |                   |      |       |    |        |      |           |              |         |     |     |
| RCT                                                | 6                 | 856  | 10.8  | 5  | =0.057 | 53.5 | 1.67 (RR) | 1.17 – 2.40  | < 0.05  | 22  | 40  |
| NRCT                                               | 4                 | 468  | 7.9   | 3  | =0.048 | 62.1 | 2.80 (RR) | 1.55 – 5.06  | < 0.001 | 31  | 30  |
| <i>Adjusted for publication bias</i>               | (6) <sup>e</sup>  | -    | -     | -  | -      | -    | 1.93 (RR) | 1.07 – 3.49  | < 0.05  | -   | -   |
| Between group <sup>f</sup>                         | 10                | 1324 | 2.1   | 1  | Ns     | -    | -         | -            | -       | -   | -   |
| <b>Intervention format</b>                         |                   |      |       |    |        |      |           |              |         |     |     |
| Group                                              | 5                 | 691  | 10.9  | 4  | =0.027 | 63.4 | 2.03 (RR) | 1.29 – 3.20  | < 0.01  | 28  | 35  |
| Individual                                         | 4                 | 433  | 2.2   | 3  | =0.531 | 0.0  | 1.65 (RR) | 1.26 – 2.17  | < 0.001 | 8   | 30  |
| Between group <sup>f</sup>                         | 9                 | 1124 | 0.5   | 1  | Ns     | -    | -         | -            | -       | -   | -   |
| <b>Psychological outcomes combined (women+men)</b> |                   |      |       |    |        |      |           |              |         |     |     |
| <b>Study design<sup>h</sup></b>                    |                   |      |       |    |        |      |           |              |         |     |     |
| RCT                                                | 20                | 2185 | 232.4 | 19 | <0.001 | 91.8 | 0.70      | 0.36 – 1.03  | <0.001  | 642 | 110 |
| <i>Adjusted for publication bias</i>               | (24) <sup>e</sup> | -    | -     | -  | -      | -    | 0.26      | -0.10 – 0.68 | ns      | -   | -   |
| NRCT                                               | 8                 | 450  | 14.9  | 7  | =0.037 | 53.1 | 0.28      | -0.00 – 0.57 | ns      | -   | -   |

1  
2  
3  
4  
5  
6  
7  
8  
9  
10  
11  
12  
13  
14  
15  
16  
17  
18  
19  
20  
21  
22  
23  
24  
25  
26  
27  
28

|                                      |                         |      |       |    |        |      |             |                     |                 |     |     |
|--------------------------------------|-------------------------|------|-------|----|--------|------|-------------|---------------------|-----------------|-----|-----|
| UCT                                  | 7                       | 215  | 6.0   | 6  | =0.424 | 0.0  | 0.55        | 0.40 – 0.70         | <0.001          | 90  | 45  |
| <i>Adjusted for publication bias</i> | <i>(10)<sup>e</sup></i> | -    | -     | -  | -      | -    | <i>0.51</i> | <i>0.36 – 0.66</i>  | <i>&lt;0.05</i> | -   | -   |
| Between group <sup>f</sup>           | 35                      | 2850 | 3.9   | 2  | Ns     | -    | -           | -                   | -               | -   | -   |
| <b>Intervention types</b>            |                         |      |       |    |        |      |             |                     |                 |     |     |
| CBT                                  | 7                       | 475  | 39.0  | 6  | <0.001 | 84.6 | 0.84        | 0.33 – 1.35         | =0.001          | 107 | 45  |
| <i>Adjusted for publication bias</i> | <i>(10)<sup>e</sup></i> | -    | -     | -  | -      | -    | <i>0.37</i> | <i>-0.19 – 0.93</i> | <i>ns</i>       | -   | -   |
| MBI                                  | 9                       | 841  | 57.7  | 8  | <0.001 | 86.1 | 0.61        | 0.17 – 0.65         | <0.001          | 158 | 55  |
| <i>Adjusted for publication bias</i> | <i>(10)<sup>e</sup></i> | -    | -     | -  | -      | -    | <i>0.42</i> | <i>0.01 – 0.84</i>  | <i>&lt;0.05</i> | -   | -   |
| Other                                | 19                      | 1430 | 149.2 | 9  | <0.001 | 87.9 | 0.50        | 0.18 – 0.81         | =0.002          | 246 | 105 |
| <i>Adjusted for publication bias</i> | <i>(24)<sup>e</sup></i> | -    | -     | -  | -      | -    | <i>0.17</i> | <i>-0.20 – 0.54</i> | <i>ns</i>       | -   | -   |
| Between group <sup>f</sup>           | 35                      | 2746 | 1.3   | 2  | Ns     | -    | -           | -                   | -               | -   | -   |
| <b>Intervention format</b>           |                         |      |       |    |        |      |             |                     |                 |     |     |
| Group                                | 20                      | 1484 | 87.2  | 19 | <0.001 | 78.2 | 0.76        | 0.55 – 0.98         | <0.001          | 959 | 110 |
| <i>Adjusted for publication bias</i> | <i>(26)<sup>e</sup></i> | -    | -     | -  | -      | -    | <i>0.50</i> | <i>0.25 – 0.75</i>  | <i>&lt;0.05</i> | -   | -   |
| Individual                           | 9                       | 834  | 17.7  | 8  | =0.023 | 54.9 | 0.13        | -0.08 – 0.35        | ns              | -   | -   |
| Couples                              | 3                       | 284  | 92.3  | 2  | <0.001 | 97.8 | 1.07        | -1.02 – 3.16        | ns              | -   | -   |
| Online                               | 3                       | 248  | 1.2   | 2  | =0.541 | 0.00 | 0.03        | -0.22 – 0.28        | ns              | -   | --  |
| Between group <sup>f</sup>           | 35                      | 2850 | 24.5  | 3  | <0.001 | -    | -           | -                   | -               | -   | -   |

<sup>a)</sup> Q-statistic: *p*-values < 0.1 taken to suggest heterogeneity. I<sup>2</sup> statistic: 0% (no heterogeneity), 25% (low heterogeneity), 50% (moderate heterogeneity), 75% (high heterogeneity).

<sup>b)</sup> ESR = Hedges *g*. Standardized mean difference, adjusting for small sample bias. A positive value indicates an effect size in the hypothesized direction, i.e. reduced pain or relative smaller increased in pain in the intervention group. All ES's were combined using a random effects model. To ensure independency, if a study reported results for more than one pain measure, the ES's were combined (mean), ensuring that only one ES per study was used in the calculation.

<sup>c)</sup> Failsafe N = number of non-significant studies that would bring the *p*-value to non-significant (*p* > 0.05)

<sup>d)</sup> A Failsafe N exceeding the criterion (5 × *k* + 10) indicates a robust result <sup>98</sup>.

<sup>e)</sup> If analyses indicated the possibility of publication bias, missing studies were imputed and an adjusted ESR calculated (italics), (K) indicates number of published studies + number of imputed studies.

<sup>f)</sup> Meta-ANOVA (between-study comparisons)

<sup>h)</sup> RCT (randomized controlled trial), NRCT (Non-randomized Controlled Trial), UCT (uncontrolled trial (pre-post))

29323  
30324  
31325  
32326  
33327  
34328  
35329  
36330  
37331  
38  
39333  
40  
41  
42  
43  
44  
45  
46  
47  
48  
49

1  
2 334 *Depression*

3  
4 335 Twenty-one studies had assessed depressive symptoms. A statistically significant ES (1.00) was  
5  
6 336 found for women and men combined. However, when adjusting for possible publication bias, the  
7  
8 337 results changed dramatically to a small, non-significant ES of 0.31. Similar results were found for  
9  
10 338 women alone with a statistically significant ES of 0.73 reduced to a non-significant 0.29 after ad-  
11  
12 339 justing for possible publication bias. For men alone, the ES (0.13) did not reach statistically signifi-  
13  
14 340 cance.

15  
16  
17  
18 341 *State anxiety*

19  
20 342 Twenty-five studies had included state anxiety as outcome. A statistically significant, robust medi-  
21  
22 343 um ES (0.51) was found for women and men combined. Adjusting for possible publication bias led  
23  
24 344 to a smaller, but statistically significant, ES (0.31). For women, the ES of 0.53 was statistically sig-  
25  
26 345 nificant, but smaller (0.32) and non-significant when adjusting for publication bias. For men only,  
27  
28 346 the analysis produced a small, non-significant ES of 0.32.

29  
30  
31  
32 347 *Marital function*

33  
34 348 Only 5 studies (N = 633) had included measures of marital function, and only very small (ES: 0.09-  
35  
36 349 0.08) non-significant effects were found.

37  
38  
39 350 **Possible moderators**

40  
41 351 As the  $Q$ -statistics were generally statistically significant ( $p < 0.10$ ) and the  $I^2$ -statistic indicated low  
42  
43 352 to medium heterogeneity, we, when a sufficient number of studies were available for each analysis,  
44  
45 353 explored possible sources of heterogeneity and analyzed whether the ESs for pregnancy and com-  
46  
47 354 bined psychological outcomes varied according to between-study differences in study design and  
48  
49 355 intervention characteristics (type and format). The results are shown in [Table 3](#).

50  
51  
52  
53 356 *Study design*

54  
55 357 The ESs found for pregnancy outcomes were statistically significant for both randomized controlled  
56  
57 358 trials (RCT) (RR=1.7) and non-randomized controlled studies (NRCT) (2.8), with the ES for NRCT



1 359 being considerably smaller (1.9) when adjusting for publication bias. The difference did not reach  
2  
3 360 statistical significance. For psychological outcomes, statistically significant results were found for  
4  
5 361 both RCTs ( $g= 0.70$ ) and UCTs (0.55), but not for NRCTs (0.28). When adjusting for publication  
6  
7  
8 362 bias, the ES for RCTs was considerably reduced (0.26). Furthermore, between-group differences  
9  
10 363 did not reach statistical significance.

#### 13 364 *Intervention type*

15 365 The number of studies for each intervention type was insufficient to explore differences in pregnan-  
16  
17 366 cy outcomes. For the combined psychological outcomes, statistically significant, and – as indicated  
18  
19 367 by the large failsafe numbers – robust effects, were found for all three intervention categories with  
20  
21 368 the largest ES found for CBT ( $g=0.84$ ), followed by MBI (0.61) and other intervention types (0.50).  
22  
23 369 The between-group differences, however, did not reach statistical significance. Furthermore, the  
24  
25 370 results suggested the possibility of publication bias, and when adjusting for publication bias, all  
26  
27 371 three ESs were reduced from medium to small.

#### 29 372 *Intervention format*

31 373 For pregnancy outcomes, the number of studies was sufficient for Group and Individual formats.  
32  
33 374 Both formats yielded statistical significant ES's (RR: 2.03 and 1.65), but the between-group differ-  
34  
35 375 ence did not reach statistical significance. For the combined psychological outcomes, a statistically  
36  
37 376 significant effect was found for Group format ( $g= 0.76$ ) ( $p < 0.001$ ). The ESs for intervention for-  
38  
39 377 mats such as Individual, Couples, and Online did not reach statistical significance. The overall be-  
40  
41 378 tween-group difference for intervention formats was statistical significant ( $p < 0.001$ ).

#### 43 379 *Other study characteristics*

45 380 The possible moderating influence of the continuously assessed study characteristics of mean age,  
46  
47 381 intervention duration, number or sessions, and study quality (modified quality scores) were ana-  
48  
49 382 lyzed with meta-regression. As seen in [Table 4](#), no significant effects were found for any of the  
50  
51 383 moderators for either pregnancy or the combined psychological outcomes. A total of 6 studies had

384 examined effects on both pregnancy and anxiety. When examining the possible role of anxiety re-  
 385 duction as a mediator of the effect on pregnancy outcome with meta-regression, a statistically sig-  
 386 nificant association was found between the ESs for anxiety and pregnancy, indicating that the great-  
 387 er the reduction in anxiety, the greater the likelihood of achieving pregnancy (see [Table 4](#)).

388 **Table 4. Results of meta-regression analyses**

| Dependent variable | Independent variable                          | K  | Beta <sup>a</sup> | 95% CI        | <i>p</i>     |
|--------------------|-----------------------------------------------|----|-------------------|---------------|--------------|
| Pregnancy          | ES- Anxiety                                   | 6  | 0.19              | 0.06 – 0.31   | <b>0.004</b> |
|                    | Mean age                                      | 9  | -0.05             | -0.19 – 0.10  | 0.534        |
|                    | Intervention duration                         | 9  | 0.01              | -0.03 – 0.06  | 0.669        |
|                    | Number of sessions                            | 9  | -0.00             | -0.08 – 1.07  | 0.922        |
|                    | Study quality (Quality scores) <sup>b</sup>   | 10 | -0.02             | -0.09 – 0.04  | 0.477        |
| Psych. Combined    | Mean age                                      | 32 | -0.05             | -0.12 – -0.02 | 0.214        |
|                    | Intervention duration                         | 32 | 0.01              | -0.02 – 0.04  | 0.518        |
|                    | Number of sessions                            | 27 | 0.03              | -0.01 – 0.07  | 0.150        |
|                    | Study quality (Quality scores) <sup>b,c</sup> | 35 | -0.02             | -0.06 – 0.02  | 0.415        |

389 <sup>a)</sup> Mixed effects regression: unrestricted maximum likelihood; <sup>b)</sup> Modified Jadad quality score; <sup>c)</sup> P-values for individual  
 390 psychological outcomes; 0.09 (anxiety) – 0.58 (depression).

## 391 Discussion

### 392 Primary findings

393 Our meta-analysis of the available evidence suggests that women who receive some form of psy-  
 394 chological intervention are approximately twice as likely to become pregnant when compared to  
 395 controls receiving standardized care or active control intervention. Although the results of the 10  
 396 currently available studies taken together appeared robust, there were some indications of publica-  
 397 tion bias in favor of studies with larger positive effect sizes. It should also be noted that the preci-  
 398 sion of the effect size estimate is limited, with possible RR's ranging from approx. 1.5 to 2.7. Fur-  
 399 thermore, although the between-group difference did not reach statistical significance, when disre-  
 400 garding the possibility of publication bias, NRCT's yielded greater effects (RR: 2.8 (95 % CI: 1.55  
 401 – 5.06)) than RCT's (RR: 1.7 (95 % CI: 1.17 – 2.40)). Compared with other types of interventions  
 402 that historically have been introduced to improve pregnancy rates in ART (improved culture media,

1  
2 403 new hormone stimulation regimens etc.), even an effect corresponding to the lower limit of the con-  
3  
4 404 fidence interval is substantial. While the results could be considered surprising, the available data  
5  
6 405 do provide any clear-cut reasons to reject this finding, which is further supported by the results of  
7  
8 406 the meta-regression showing that larger reductions in anxiety were associated with improved preg-  
9  
10 407 nancy outcomes. With respect to the psychological outcomes currently reported in the literature, the  
11  
12 408 results suggest that psychological intervention could be effective in reducing anxiety (25 studies) as  
13  
14 409 well as depressive symptoms (21 studies) with the effects corresponding to medium and large effect  
15  
16 410 sizes (0.5 and 1.0). As seen for pregnancy outcomes, there were indications of publication bias in  
17  
18 411 the direction of larger positive effects, and adjusting for publication bias resulted in a considerably  
19  
20 412 smaller, statistically non-significant, effect size for depressive symptoms. The pooled results did not  
21  
22 413 reach statistical significance for the 10 studies which had investigated effects on infertility-related  
23  
24 414 distress and the 5 studies which had included measures of marital function.

#### 28 29 415 **Comparing with results of previous reviews**

30  
31 416 The present review included 39 studies of a total of 3401 women (3064) and men (347). The partic-  
32  
33 417 ipants received various psychosocial interventions lasting from one week to six months, including  
34  
35 418 cognitive behavioral therapy, emotional disclosure, psycho-education, and mind/body interventions.  
36  
37 419 The present review evaluates almost twice the number of studies included in the most recent previ-  
38  
39 420 ous review,<sup>31</sup> which reported mixed results of the efficacy of psychosocial intervention. Whereas  
40  
41 421 the former review found no evidence for attenuating distress, there was promising support of psy-  
42  
43 422 chological intervention increasing pregnancy chances for women not receiving ART.<sup>31</sup> In line with  
44  
45 423 the second review from 2005,<sup>30</sup> we found more credible results for group intervention than for other  
46  
47 424 formats, e.g. online interventions, individual, and couples intervention.<sup>30</sup> The first review published  
48  
49 425 in 2003 also highlighted group interventions as more effective, especially if the interventions em-  
50  
51 426 phasized education and skills training, such as relaxation. Our results concurred with these earlier  
52  
53 427 observations, suggesting that interventions delivered in groups may be more effective in reducing  
54  
55 428 distress. Moreover, although the comparison did not reach statistical significance; prior to adjusting  
56  
57  
58  
59  
60

1  
2 429 for publication bias, the intervention type of CBT appeared to be more effective than MBI and other  
3  
4 430 types of interventions. Here, it should be noted that the categorization of interventions may be  
5  
6 431 somewhat ambiguous. For example, the study by Cousineau et al. (2000)<sup>83</sup> could have been catego-  
7  
8 432 rized as a mind-body intervention, as the authors had provided a website that directed attention to-  
9  
10 433 wards relaxation exercises. However, as there was no reporting of whether the participants were  
11  
12 434 engaged in weekly or daily training, we chose to interpret relaxation as an optional feature, and  
13  
14 435 hence the study was not categorized as MBI. The possible ambiguity and considerable variability in  
15  
16 436 interventions forced us to categorize many studies as “other”, which limits our understanding the  
17  
18 437 possible mechanisms in psychosocial interventions. Taken together, the available data do not pro-  
19  
20 438 vide a clear basis for understanding possible differences between effects of different intervention  
21  
22 439 types, and the results should be interpreted with caution. The more recently conducted studies in-  
23  
24 440 cluded in the present review have contributed by increasing the size of the available dataset consid-  
25  
26 441 erably, and taken together, the currently available evidence suggests that offering psychosocial in-  
27  
28 442 terventions may improve both chances of pregnancy and quality-of-life for infertile patients going  
29  
30 443 through fertility treatment.  
31  
32  
33  
34  
35

#### 36 444 **Strengths and limitations**

37  
38 445 Our systematic review and meta-analysis has several strengths. We conducted a comprehensive  
39  
40 446 search and performed the review in accordance with the recommended guidelines.<sup>34</sup> In order to lim-  
41  
42 447 it the possibility of selection bias, we encouraged authors of eligible studies to elaborate on their  
43  
44 448 results if the data reported was insufficient, and asked authors of papers written in foreign language  
45  
46 449 to submit their results to us in English. The included studies represented a range of different coun-  
47  
48 450 tries, has used comparable outcome measures, and provided fairly comprehensive descriptions of  
49  
50 451 the interventions studied. In addition, we conducted a detailed evaluation of the methodological  
51  
52 452 quality in order to detect any issues that could possible affect the accuracy of the effect sized calcu-  
53  
54 453 lated. While not all characteristics, in particular reproductive, could be assessed; most general  
55  
56  
57  
58  
59  
60

1 454 methodological aspects were covered. We also explored heterogeneity and made adjustments for  
2  
3  
4 455 possible publication bias, when required.  
5  
6

7 456 Some limitations of the currently available data should also be noted. First, the samples investigated  
8  
9 457 may not have been as homogeneous as could be wished for. A small number of infertile participants  
10  
11 458 did not receive treatment with ART, and, furthermore, it was not consistently reported what type of  
12  
13 459 ART procedure the participants received, what phase or treatment they were in, or the causes of  
14  
15 460 infertility. This information is clearly important when interpreting the outcomes, and unknown be-  
16  
17 461 tween-study and within-study between-group differences, e.g. in numbers of cycles, idiopathic in-  
18  
19 462 fertility and embryo transfer, may have influenced the results, in particular for pregnancy outcomes.  
20  
21 463 However, such differences are likely to be less important in RCT's, where randomization is ex-  
22  
23 464 pected to reduce their influence. Although the difference did not reach statistical significance, RCTs  
24  
25 465 reported smaller ESs for pregnancy outcomes than NRCTs, which could be interpreted as support-  
26  
27 466 ing the concern that infertility and treatment characteristics may have been unevenly distributed  
28  
29 467 between psychological treatment arms, thus increasing the risk for misattribution of outcomes to  
30  
31 468 intervention, at least for NRCTs. On the other hand, we found no statistical significant associations  
32  
33 469 between study quality scores and either pregnancy or psychological outcomes, no statistically sig-  
34  
35 470 nificant differences in dropout rates between intervention and control groups, and, as suggested by  
36  
37 471 the large failsafe numbers, improvements generally appeared quite robust. A second possible limita-  
38  
39 472 tion is the high level of heterogeneity indicated by Q and I<sup>2</sup> statistics, and the pooled effect sizes  
40  
41 473 reported in the present review should thus be viewed as an estimate of the average expected effect  
42  
43 474 across a wide range of different settings. A third issue is that the considerable dropout rates and lack  
44  
45 475 of intention-to-treat analyses may have influenced the results, and it cannot be excluded that fertili-  
46  
47 476 ty- and treatment-related factors such as non-optimal fertilization, small number of eggs, etc. may  
48  
49 477 have demotivated some participants and made them drop out of the study, while individuals who  
50  
51 478 progressed through the treatment phases with more satisfactory outcomes were more likely to com-  
52  
53 479 plete the study. Fourth, the indications of publication bias found for several results suggest the pos-  
54  
55  
56  
57  
58  
59  
60

1  
2 480 sibility of a “file drawer problem”, i.e. the existence of relevant unpublished null-findings, a com-  
3  
4 481 mon problem when conducting systematic reviews. Finally, due to inconsistencies in the reporting  
5  
6 482 of causes of infertility, we are unable to evaluate the possible associations between effect sizes and  
7  
8 483 causes of infertility. Although meta-analysis remains the gold standard when evaluating the current  
9  
10 484 evidence within a field of research, as is often the case with systematic reviews, qualitative as well  
11  
12 485 as quantitative, the overall level of the evidence reported in our review may be challenged by publi-  
13  
14 486 cation bias and the heterogeneity and methodological limitations of the available published studies.

### 17 18 487 **Clinical and practical implications**

19  
20 488 We found evidence for improvement in general psychological symptoms such as anxiety and de-  
21  
22 489 pression, but not for infertility-specific distress. A possible explanation for the latter could be the  
23  
24 490 lack of sensitivity of the infertility-related distress measures used. The questions used in these  
25  
26 491 measures are directly concerned with thoughts and feelings about involuntarily childlessness, and  
27  
28 492 rumination about the involuntary childlessness may persist, even when psychosocial intervention  
29  
30 493 improves general psychological wellbeing. Of particular interest is the result of our meta-regression  
31  
32 494 analysis of the six studies which had included both pregnancy and anxiety as outcomes showing  
33  
34 495 that larger reductions in anxiety were associated with greater chances of pregnancy. Anxiety is a  
35  
36 496 state of arousal, which over time is physically and mentally stressful for the individual.<sup>17</sup> Reducing  
37  
38 497 distress, anxiety in particular, may increase the physiological ability to cope with stress and advance  
39  
40 498 the possibility of impregnation. We found no association between mean age and pregnancy rates  
41  
42 499 outcomes, which may seem surprising, since age is the most important predictor of pregnancy out-  
43  
44 500 comes of ART.<sup>99,100</sup> However, our meta-regression was conducted for the mean age of the *samples*  
45  
46 501 and the mean age across study samples showed little variation (Mean age: 32.7; SD: 2.4). The rather  
47  
48 502 narrow age interval across study samples may explain an apparent lack of association between age  
49  
50 503 and chance of pregnancy. Our findings also suggest that group interventions appear to be more effi-  
51  
52 504 cacious than individual, couples, or online interventions. There could be various reasons for this.  
53  
54 505 Firstly, group interventions had longer duration (mean: 9.5 weeks) and involved more sessions (8.3)

1  
2 506 than individual interventions (mean: 5.3 and 4.4) and secondly, there is evidence of a positive im-  
3  
4 507 pact of “group settings” i.e. the sense-of-community between participants, reducing the feelings of  
5  
6 508 isolation or alienation and sharing with individuals in the same life situation etc.<sup>101-104</sup>  
7  
8

### 9 **Recommendations for future research**

10  
11 510 Despite the overall positive effects of psychosocial interventions found in the literature, our results  
12  
13 511 suggest a need for further studies with more rigorous methodology, including more strict reporting  
14  
15 512 of causes of infertility, the types of ART used, and which phases of treatment participants are in.  
16  
17 513 Also, most of the studies were conducted in high-income countries, it is therefore important to note  
18  
19 514 that the assertions made here cannot be generalized to low-income and developing countries. There  
20  
21 515 is thus a need for research in low-income or developing countries as well. Another aspect pertaining  
22  
23 516 to generalizability is the challenge of comparing volunteering infertile participants in psychosocial  
24  
25 517 efficacy studies with the general population of infertile individuals. The response rates in this area  
26  
27 518 are moderate, and it seems important in future studies to explore and compare characteristics of not  
28  
29 519 only dropouts and completers, but also of non-responders and responders. Furthermore, it would be  
30  
31 520 of importance to develop clinically meaningful categories of distress with the purpose of improving  
32  
33 521 interventions targeted to the various types and levels of distress experienced by the participants.  
34  
35 522 Psychological well-being/distress fluctuates over time during fertility treatment and a stepped care  
36  
37 523 approach could be potentially valuable in this population.<sup>105</sup> It is also possible that interventions  
38  
39 524 aimed at relieving distress conducted at different phases in treatment may obtain different psycho-  
40  
41 525 logical outcome results. This calls for improved reporting and comparability of the timing of the  
42  
43 526 psychosocial interventions and greater precision and comparability of the timing of outcome as-  
44  
45 527 sessments. Also needed are studies testing specific hypotheses concerning possible moderating and  
46  
47 528 mediating mechanisms of the effects of interventions on distress and pregnancy outcomes. For ex-  
48  
49 529 ample, which psychosocial factors do we need to target to optimize effects on distress and pregnan-  
50  
51 530 cy rates, and which biomarkers affected by psychosocial interventions, e.g. oxidative stress, in-  
52  
53 531 flammatory processes, can best explain the observed effects. This could assist in developing a more  
54  
55  
56  
57  
58  
59  
60

1  
2 532 solid evidence base providing better guidance for patients, health professionals, and policy makers  
3  
4 533 about “what works for whom” in infertile patients.  
5  
6  
7

## 8 534 **Conclusions**

9  
10 535 In conclusion, the present meta-analysis of 39 studies suggests that psychosocial intervention, in  
11  
12 536 particular CBT and MBI interventions, are beneficial for reducing distress in the form of anxiety  
13  
14  
15 537 and depressive symptoms and for improving pregnancy outcomes of ART. Moreover, there is some  
16  
17 538 preliminary evidence to suggest that reduction in anxiety achieved through psychological interven-  
18  
19 539 tion may improve the chance of pregnancy. Despite the robust overall effect found, the considerable  
20  
21 540 heterogeneity of the available studies with respect to methodological quality, intervention type and  
22  
23 541 format still warrants caution as to the conclusions which can be drawn.  
24  
25  
26  
27

## 28 542 **Acknowledgements**

29  
30 543 We would like to thank Gina Bay, Librarian at the Institute Library, Institute of Psychology and  
31  
32 544 Behavioral Sciences, School of Business and Social Sciences, Aarhus University for valuable and  
33  
34 545 tireless assistance throughout the database search process. We would also like to give our most  
35  
36 546 grateful thanks to the researchers who provided us with additional data on their studies or aided us  
37  
38 547 in other ways.  
39  
40  
41

42 548 Contributors: RZ and YF designed the protocol. YF developed search strategies and IFV, NGS and  
43  
44 549 YF performed the searches and study selection. YF and IFV undertook data extraction and quality  
45  
46 550 assessments. RZ was responsible for analyzing the data. YF drafted the manuscript and IFV, NGS,  
47  
48 551 HJI and RZ contributed to the manuscript throughout the process. All authors provided input and  
49  
50 552 were involved with the interpretation of this review. YF is the study guarantor.  
51  
52

53  
54 553 Funding: This specific study has not received funding, but Y.F. was supported by a research grant  
55  
56 554 from The Danish Agency for Science Technology and Innovation.  
57  
58  
59  
60



1 555 Competing interests: None declared

2  
3  
4 556 Ethical approval: None required

5  
6  
7  
8 557 Data sharing: No additional data available

9  
10  
11 558 **What is already known on this topic**

12  
13  
14 559 Previous reviews have been inconclusive concerning the efficacy of psychosocial interventions for  
15  
16 560 reducing distress and improving clinical pregnancy chances.

17  
18  
19 561 **What this study adds**

20  
21  
22 562 Synthesizing the currently available evidence suggests that psychosocial interventions could pro-  
23  
24 563 vide clinically meaningful benefits for infertile women and men. Psychosocial intervention leads to  
25  
26 564 reductions in anxiety and depressive symptoms, and larger reductions in anxiety appear to be asso-  
27  
28 565 ciated with increased fertility rates for women in treatment for infertility.

29  
30  
31  
32 566 **Legends to figures**

33  
34  
35 567 Figure 1. PRISMA flowchart of selection of studies

36  
37  
38 568 Figure 2. Effects of psychosocial intervention on pregnancy rates

39  
40  
41 569 Figure 3. Effects of psychosocial intervention on combined psychological outcomes

42  
43  
44 570

45  
46  
47  
48 571 **References**

49  
50  
51  
52 572 1. Hart VA. Infertility and the role of psychotherapy. *Issues Ment Health Nurs*. 2002;23(1):31-41.

53  
54  
55 573 2. Oddens BJ, den Tonkelaar I, Nieuwenhuys H. Psychosocial experiences in women facing fertili-  
56  
57 574 ty problems--a comparative survey. *Hum Reprod*. 1999;14(1):255-261.

- 1  
2 575 3. Cwikel J, Gidron Y, Sheiner E. Psychological interactions with infertility among women. *Eur J*  
3  
4 576 *Obstet Gynecol Reprod Biol.* 2004;117(2):126-131.  
5  
6  
7 577 4. Swan SH, Elkin EP, Fenster L. The question of declining sperm density revisited: An analysis of  
8  
9 578 101 studies published 1934-1996. *Environ Health Perspect.* 2000;108(10):961-966.  
10  
11  
12 579 5. Skakkebaek NE, Jorgensen N, Main KM, et al. Is human fecundity declining? *Int J Androl.*  
13  
14 580 2006;29(1):2-11.  
15  
16  
17 581 6. Hammen C. Stress and depression. *Annu Rev Clin Psychol.* 2005;1:293-319.  
18  
19  
20  
21 582 7. Benyamini Y, Gozlan M, Kokia E. Variability in the difficulties experienced by women undergo-  
22  
23 583 ing infertility treatments. *Fertil Steril.* 2005;83(2):275-283.  
24  
25  
26  
27 584 8. Alesi R. Infertility and its treatment--an emotional roller coaster. *Aust Fam Physician.*  
28  
29 585 2005;34(3):135-138.  
30  
31  
32  
33 586 9. Merari D, Chetrit A, Modan B. Emotional reactions and attitudes prior to in vitro fertilization: An  
34  
35 587 inter-spouse study. *Psychol Health.* 2002;17(5):629-640.  
36  
37  
38 588 10. Klonoff-Cohen H, Chu E, Natarajan L, Sieber W. A prospective study of stress among women  
39  
40 589 undergoing in vitro fertilization or gamete intrafallopian transfer. *Fertil Steril.* 2001;76(4):675-687.  
41  
42  
43  
44 590 11. Edelmann RJ, Connolly KJ, Bartlett H. Coping strategies and psychological adjustment of cou-  
45  
46 591 ples presenting for IVF. *J Psychosom Res.* 1994;38(4):355-364.  
47  
48  
49  
50 592 12. Eugster A, Vingerhoets AJ. Psychological aspects of in vitro fertilization: A review. *Soc Sci*  
51  
52 593 *Med.* 1999;48(5):575-589.  
53  
54  
55 594 13. Stanton AL, Dunkel-Schetter C, eds. *Psychological adjustment to infertility: An overview of*  
56  
57 595 *conceptual approaches.* Stanton, Annette L.; Dunkel-Schetter, Christine . Infertility: Perspectives  
58  
59  
60

- 1  
2 596 from stress and coping research. The Plenum series on stress and coping. (pp. 3-16). New York,  
3  
4 597 NY, US: Plenum Press; 1991 Infertility: Perspectives from stress and coping research.  
5  
6  
7 598 14. Benyamini Y, Gozlan M, Kokia E. Women's and men's perceptions of infertility and their asso-  
8  
9 599 ciations with psychological adjustment: A dyadic approach. *British Journal of Health Psychology*.  
10  
11 600 2009;14:1-16. doi: 10.1348/135910708X279288.  
12  
13  
14  
15 601 15. du Plessis S,S., Makker K, Desai NR, Agarwal A. Impact of oxidative stress on IVF. *Expert*  
16  
17 602 *Review of Obstetrics & Gynecology*. 2008;3(4):539-554.  
18  
19 603 <http://dx.doi.org/10.1586/17474108.3.4.539>. doi: 10.1586/17474108.3.4.539.  
20  
21  
22  
23 604 16. Agarwal A, Allamaneni SS. Role of free radicals in female reproductive diseases and assisted  
24  
25 605 reproduction. *Reprod Biomed Online*. 2004;9:338-347.  
26  
27  
28 606 17. Tracey KJ. The inflammatory reflex. *Nature*. 2002;420(6917):853-859. doi:  
29  
30 607 10.1038/nature01321 [doi].  
31  
32  
33  
34 608 18. Kiecolt-Glaser JK, McGuire L, Robles TF, Glaser R. Emotions, morbidity, and mortality: New  
35  
36 609 perspectives from psychoneuroimmunology. *Annu Rev Psychol*. 2002;53:83-107. doi:  
37  
38 610 10.1146/annurev.psych.53.100901.135217 [doi].  
39  
40  
41  
42 611 19. Csemiczky G, Landgren BM, Collins A. The influence of stress and state anxiety on the out-  
43  
44 612 come of IVF-treatment: Psychological and endocrinological assessment of swedish women entering  
45  
46 613 IVF-treatment. *Acta Obstet Gynecol Scand*. 2000;79(2):113-118.  
47  
48  
49  
50 614 20. Stoleru S, Teglas JP, Fermanian J, Spira A. Psychological factors in the aetiology of infertility:  
51  
52 615 A prospective cohort study. *Hum Reprod*. 1993;8(7):1039-1046.  
53  
54  
55  
56  
57  
58  
59  
60

- 1  
2 616 21. Demyttenaere K, Nijs P, Evers-Kiebooms G, Koninckx PR. Coping and the ineffectiveness of  
3  
4 617 coping influence the outcome of in vitro fertilization through stress responses. *Psychoneuroendo-*  
5  
6 618 *crinology*. 1992;17(6):655-665. doi: [http://dx.doi.org/10.1016/0306-4530\(92\)90024-2](http://dx.doi.org/10.1016/0306-4530(92)90024-2).  
7  
8  
9  
10 619 22. Sanders KA, Bruce NW. Psychosocial stress and treatment outcome following assisted repro-  
11  
12 620 ductive technology. *Human Reproduction*. 1999;14(6):1656-1662. doi: 10.1093/humrep/14.6.1656.  
13  
14  
15 621 23. Smeenk JM, Verhaak CM, Vingerhoets AJ, et al. Stress and outcome success in IVF: The role  
16  
17 622 of self-reports and endocrine variables. *Hum Reprod*. 2005;20(4):991-996.  
18  
19  
20  
21 623 24. Ebbesen SM, Zachariae R, Mehlsen MY, et al. Stressful life events are associated with a poor  
22  
23 624 in-vitro fertilization (IVF) outcome: A prospective study. *Hum Reprod*. 2009;24(9):2173-2182. doi:  
24  
25 625 10.1093/humrep/dep185; 10.1093/humrep/dep185.  
26  
27  
28 626 25. Klonoff-Cohen H. Female and male lifestyle habits and IVF: What is known and unknown.  
29  
30 627 *Hum Reprod Update*. 2005;11(2):179-203.  
31  
32  
33  
34 628 26. Homan GF, Davies M, Norman R. The impact of lifestyle factors on reproductive performance  
35  
36 629 in the general population and those undergoing infertility treatment: A review. *Hum Reprod Up-*  
37  
38 630 *date*. 2007;13(3):209-223. doi: 10.1093/humupd/dml056.  
39  
40  
41  
42 631 27. Matthiesen SM, Frederiksen Y, Ingerslev HJ, Zachariae R. Stress, distress and outcome of as-  
43  
44 632 sisted reproductive technology (ART): A meta-analysis. *Hum Reprod*. 2011;26(10):2763-2776. doi:  
45  
46 633 10.1093/humrep/der246; 10.1093/humrep/der246.  
47  
48  
49  
50 634 28. Boivin J, Griffiths E, Venetis CA. Emotional distress in infertile women and failure of assisted  
51  
52 635 reproductive technologies: Meta-analysis of prospective psychosocial studies. *BMJ*. 2011;342:d223.  
53  
54 636 doi: 10.1136/bmj.d223.  
55  
56  
57  
58  
59  
60

- 1  
2 637 29. Boivin J. A review of psychosocial interventions in infertility. *Soc Sci Med.* 2003;57(12):2325-  
3  
4 638 2341.  
5  
6  
7 639 30. de Liz TM, Strauss B. Differential efficacy of group and individual/couple psychotherapy with  
8  
9 640 infertile patients. *Hum Reprod.* 2005;20(5):1324-1332.  
10  
11  
12 641 31. Haemmerli K, Znoj H, Barth J. The efficacy of psychological interventions for infertile patients:  
13  
14 642 A meta-analysis examining mental health and pregnancy rate. *Hum Reprod Update.*  
15  
16 643 2009;15(3):279-295. doi: 10.1093/humupd/dmp002.  
17  
18  
19  
20 644 32. Hoffmann TC, Glasziou PP, Boutron I, et al. Better reporting of interventions: Template for  
21  
22 645 intervention description and replication (TIDieR) checklist and guide. *BMJ.* 2014;348:g1687. doi:  
23  
24 646 10.1136/bmj.g1687.  
25  
26  
27  
28 647 33. Liberati A, Altman DG, Tetzlaff J, et al. The PRISMA statement for reporting systematic re-  
29  
30 648 views and meta-analyses of studies that evaluate health care interventions: Explanation and elabora-  
31  
32 649 tion. *PLoS Med.* 2009;6(7):e1000100. <http://dx.doi.org/10.1371%2Fjournal.pmed.1000100>.  
33  
34  
35  
36 650 34. Moher D, Liberati A, Tetzlaff J, Altman DG, The PG. Preferred reporting items for systematic  
37  
38 651 reviews and meta-analyses: The PRISMA statement. *PLoS Med.* 2009;6(7):e1000097.  
39  
40 652 <http://dx.doi.org/10.1371%2Fjournal.pmed.1000097>.  
41  
42  
43  
44 653 35. Higgins J, Green S, eds. *Cochrane handbook for systematic reviews of interventions*. Version  
45  
46 654 5.1.0 [updated March 2011] ed. The Cochrance Collaboration; 2011. Available from  
47  
48 655 [www.cochrane-handbook.org](http://www.cochrane-handbook.org).  
49  
50  
51  
52 656 36. Gurunath S, Pandian Z, Anderson RA, Bhattacharya S. Defining infertility-a systematic review  
53  
54 657 of prevalence studies. *Hum Reprod Update.* 2011;17(5):575-588.  
55  
56  
57  
58  
59  
60

- 1  
2 658 37. Jadad AR, Moore RA, Carroll D, et al. Assessing the quality of reports of randomized clinical  
3  
4 659 trials: Is blinding necessary? *Control Clin Trials*. 1996;17(1):1-12.  
5  
6  
7 660 38. Greenland S, O'rourke K. On the bias produced by quality scores in meta-analysis, and a hierar-  
8  
9 661 chical view of proposed solutions. *Biostatistics*. 2001;2(4):463-471. doi:  
10 662 10.1093/biostatistics/2.4.463.  
11  
12  
13  
14 663 39. Cohen J. *Statistical power analysis for the behavioral sciences*. Hillsdale, N.J.: Lawrence Erl-  
15  
16 664 baum Associates; 1988.  
17  
18  
19  
20 665 40. Hedges L, Olkin I. *Statistical methods for meta-analysis*. New York: Acedemic Press; 1985.  
21  
22  
23  
24 666 41. Tuschen-Caffier B, Florin I, Krause W, Pook M. Cognitive-behavioral therapy for idiopathic  
25  
26 667 infertile couples. *Psychother Psychosom*. 1999;68(1):15-21.  
27  
28  
29  
30 668 42. Hozo S, Djulbegovic B, Hozo I. Estimating the mean and variance from the median, range, and  
31  
32 669 the size of a sample. *BMC Medical Research Methodology*. 2005;5(1):13.  
33  
34 670 <http://www.biomedcentral.com/1471-2288/5/13>.  
35  
36  
37 671 43. Sterne JAC, Egger M, Moher D. Addressing reporting biases. In: John Wiley & Sons, Ltd;  
38  
39 672 2008:297-333. <http://dx.doi.org/10.1002/9780470712184.ch10>. 10.1002/9780470712184.ch10.  
40  
41  
42  
43 673 44. Poole C, Greenland S. Random-effects meta-analyses are not always conservative. *American*  
44  
45 674 *Journal of Epidemiology*. 1999;150(5):469-475.  
46  
47  
48  
49 675 45. Higgins JP, Thompson SG, Deeks JJ, Altman DG. Measuring inconsistency in meta-analyses.  
50  
51 676 *BMJ*. 2003;327(7414):557-560. doi: 10.1136/bmj.327.7414.557.  
52  
53  
54 677 46. Hedges LV, Pigott TD. The power of statistical tests in meta-analysis. *Psychol Methods*.  
55  
56 678 2001;6(3):203-217.  
57  
58  
59  
60

- 1  
2 679 47. Ioannidis JP, Trikalinos TA. The appropriateness of asymmetry tests for publication bias in me-  
3  
4 680 ta-analyses: A large survey. *CMAJ*. 2007;176(8):1091-1096. doi: 10.1503/cmaj.060410.  
5  
6  
7 681 48. Copas J, Shi JQ. Meta-analysis, funnel plots and sensitivity analysis. *Biostatistics*.  
8  
9 682 2000;1(3):247-262. doi: 10.1093/biostatistics/1.3.247.  
10  
11  
12 683 49. Deeks JJ, Macaskill P, Irwig L. The performance of tests of publication bias and other sample  
13  
14 684 size effects in systematic reviews of diagnostic test accuracy was assessed. *J Clin Epidemiol*.  
15  
16 685 2005;58(9):882-893. doi: 10.1016/j.jclinepi.2005.01.016.  
17  
18  
19  
20 686 50. Matthias Egger, George Davey Smith, Martin Schneider, Christoph Minder. Bias in meta-  
21  
22 687 analysis detected by a simple, graphical test. *BMJ*. 1997;315(7109):629-634. doi:  
23  
24 688 10.1136/bmj.315.7109.629.  
25  
26  
27  
28 689 51. Rosenthal R. The file drawer problem and tolerance for null results. *Psychol Bull*.  
29  
30 690 1979;86(3):638-641. doi: 10.1037/0033-2909.86.3.638.  
31  
32  
33  
34 691 52. Duval S, Tweedie R. Trim and fill: A simple funnel-plot-based method of testing and adjusting  
35  
36 692 for publication bias in meta-analysis. *Biometrics*. 2000;56(2):455-463.  
37  
38  
39  
40 693 53. Gutierrez K. Group psychological intervention in assisted human reproduction. *Rev Iberoam*  
41  
42 694 *Fertil Reprod Humana*. 2008;25(SUPPL. 1):47-54.  
43  
44  
45 695 54. Bjornsen K. Opening the door to fertility. retreat to fertile ground: Sometimes the secret to get-  
46  
47 696 ting pregnant lies in just getting away from it all. *ALTERN MED*. 2006(88):80-81.  
48  
49 697 <http://search.ebscohost.com/login.aspx?direct=true&db=c8h&AN=2009216983&site=ehost-live>.  
50  
51  
52  
53 698 55. Pengelly P, Inglis M, Cudmore L. Infertility: Couples' experiences and the use of counselling in  
54  
55 699 treatment centres. *Psychodynamic Counselling*. 1995;1(4):507-524.  
56  
57  
58  
59  
60

- 1  
2 700 56. Stewart DE, Boydell KM, McCarthy K, Swerdlyk S, Redmond C, Cohrs W. A prospective  
3  
4 701 study of the effectiveness of brief professionally-led support groups for infertility patients. *Int J*  
5  
6 702 *Psychiatry Med.* 1992;22(2):173-182.  
7  
8  
9 703 57. Landis JR, Koch GG. The measurement of observer agreement for categorical data. *Biometrics.*  
10  
11 704 1977;33(1):159-174.  
12  
13  
14  
15 705 58. Nilforooshan P, Ahmadi A, Abedi MR, Ahmadi M. Counseling based on interacting cognitive  
16  
17 706 subsystems and its effect on anxiety of infertile couples. *Pakistan Journal of Psychological Re-*  
18  
19 707 *search.* 2006;21(3-4):95-103.  
20  
21 708 <http://search.proquest.com.ez.statsbiblioteket.dk:2048/docview/621710509?accountid=14468>.  
22  
23  
24  
25 709 59. Schmidt L, Holstein BE, Christensen U, Boivin J. Communication and coping as predictors of  
26  
27 710 fertility problem stress: Cohort study of 816 participants who did not achieve a delivery after 12  
28  
29 711 months of fertility treatment. *Hum Reprod.* 2005;20(11):3248-3256. doi: 10.1093/humrep/dei193.  
30  
31  
32  
33 712 60. Galhardo A, Cunha M, Pinto-Gouveia J. Mindfulness-based program for infertility: Efficacy  
34  
35 713 study. *Fertil Steril.* 2013.  
36  
37  
38 714 61. Faramarzi M, Kheirkhah F, Esmaelzadeh S, Alipour A, Hjihamadi M, Rahnama J. Is psycho-  
39  
40 715 therapy a reliable alternative to pharmacotherapy to promote the mental health of infertile women?  
41  
42 716 A randomized clinical trial. *Eur J Obstet Gynecol Reprod Biol.* 2008;141(1):49-53.  
43  
44  
45  
46 717 62. Lukse MP. The effect of group counseling on the frequency of grief reported by infertile cou-  
47  
48 718 ples. *JOGNN.* 1985;14(6):67S-70s.  
49  
50 719 <http://search.ebscohost.com/login.aspx?direct=true&db=c8h&AN=1986045607&site=ehost-live>.  
51  
52 720 doi: 10.1111/j.1552-6909.1985.tb02804.x.  
53  
54  
55  
56 721 63. Domar AD, Seibel MM, Benson H. The mind/body program for infertility: A new behavioral  
57  
58 722 treatment approach for women with infertility. *Fertil Steril.* 1990;53(2):246-249.  
59  
60



- 1  
2 723 64. Domar AD, Zuttermeister PC, Seibel M, Benson H. Psychological improvement in infertile  
3  
4 724 women after behavioral treatment - a replication. *Fertil Steril*. 1992;58(1):144-147.  
5  
6  
7 725 65. Emery M, Béran M-, Darwiche J, et al. Results from a prospective, randomized, controlled  
8  
9 726 study evaluating the acceptability and effects of routine pre-IVF counselling. *Human Reproduction*.  
10  
11 727 2003;18(12):2647-2653. doi: 10.1093/humrep/deg501.  
12  
13  
14 728 66. Lee S. Effects of using a nursing crisis intervention program on psychosocial responses and  
15  
16 729 coping strategies of infertile women during in vitro fertilization. *J NURS RES*. 2003;11(3):197-207.  
17  
18 730 <http://search.ebscohost.com/login.aspx?direct=true&db=c8h&AN=2004076404&site=ehost-live>.  
19  
20  
21  
22 731 67. Chan CHY, Ng EHY, Chan CLW, Ho, Chan THY. Effectiveness of psychosocial group inter-  
23  
24 732 vention for reducing anxiety in women undergoing in vitro fertilization: A randomized controlled  
25  
26 733 study. *Fertil Steril*. 2006;85(2):339-346.  
27  
28  
29  
30 734 68. Tuil WS, Verhaak CM, Braat DD, de Vries Robbe PF, Kremer JA. Empowering patients under-  
31  
32 735 going in vitro fertilization by providing internet access to medical data. *Fertil Steril*.  
33  
34 736 2007;88(2):361-368. doi: 10.1016/j.fertnstert.2006.11.197.  
35  
36  
37  
38 737 69. Lancaster D, Boivin J. A feasibility study of a brief coping intervention (PRCI) for the waiting  
39  
40 738 period before a pregnancy test during fertility treatment. *Hum Reprod*. 2008;23(10):2299-2307.  
41  
42  
43  
44 739 70. Mori A. Supporting stress management for women undergoing the early stages of fertility  
45  
46 740 treatment: A cluster-randomized controlled trial. *Jpn J Nurs Sci*. 2009;6(1):37-49.  
47  
48  
49  
50 741 71. Panagopoulou E, Montgomery A, Tarlatzis B. Experimental emotional disclosure in women  
51  
52 742 undergoing infertility treatment: Are drop outs better off? *Soc Sci Med*. 2009;69(5):678-681.  
53  
54  
55  
56 743 72. Haemmerli K, Znoj H, Berger T. Internet-based support for infertile patients: A randomized  
57  
58 744 controlled study. *Journal of Behavioral Medicine*. 2010;33(2):135-146.  
59  
60

- 1  
2 745 73. Hughes EG, Da Silva AM. A pilot study assessing art therapy as a mental health intervention  
3  
4 746 for subfertile women. *Hum Reprod.* 2011;26(3):611-615.  
5  
6  
7 747 74. Matthiesen S, Klonoff-Cohen H, Zachariae R, et al. The effect of an expressive writing inter-  
8  
9 748 vention (EWI) on stress in infertile couples undergoing assisted reproductive technology (ART)  
10  
11 749 treatment: A randomized controlled pilot study. *Br J Health Psychol.* 2012;17(2):362-378. doi:  
12  
13 750 10.1111/j.2044-8287.2011.02042.x; 10.1111/j.2044-8287.2011.02042.x.  
14  
15  
16  
17 751 75. Mosalanejad L, Koolae AK, Behbahani BM. Looking out for the secret wound: The effect of  
18  
19 752 E-cognitive group therapy with emotional disclosure on the status of mental health in infertile  
20  
21 753 women. *Int J Fertil Steril.* 2012;6(2):87-94.  
22  
23  
24  
25 754 76. Mosalanejad L, Koolae AK, Jamali S. Effect of cognitive behavioral therapy in mental health  
26  
27 755 and hardiness of infertile women receiving assisted reproductive therapy (ART). *Iranian Journal of*  
28  
29 756 *Reproductive Medicine.* 2012;10(5):483-488.  
30  
31  
32  
33 757 77. Catoire P, Delaunay L, Dannappel T, et al. Hypnosis versus diazepam for embryo transfer: A  
34  
35 758 randomized controlled study. *Am J Clin Hypn.* 2013;55(4):378-386. doi:  
36  
37 759 10.1080/00029157.2012.747949.  
38  
39  
40  
41 760 78. Domar AD, Clapp D, Slawsby E, Kessel B, Orav J, Freizinger M. The impact of group psycho-  
42  
43 761 logical interventions on distress in infertile women. *Health Psychology.* 2000;19(6):568-575.  
44  
45 762 <http://search.proquest.com.ez.statsbiblioteket.dk:2048/docview/619538260?accountid=14468>. doi:  
46  
47 763 <http://dx.doi.org.ez.statsbiblioteket.dk:2048/10.1037/0278-6133.19.6.568>.  
48  
49  
50  
51 764 79. O'Moore AM, O'Moore RR, Harrison RF. Psychosomatic aspects in idiopathic infertility: Ef-  
52  
53 765 fects of treatment with autogenic training. *J Psychosom Res.* 1983;27(2):145-151.  
54  
55  
56  
57  
58  
59  
60

- 1  
2 766 80. McQueeney D, Stanton A, Sigmon S. Efficacy of emotion-focused and problem-focused group  
3  
4 767 therapies for women with fertility problems. *J Behav Med.* 1997;20(4):313-331. doi:  
5  
6 768 10.1023/A:1025560912766.  
7  
8  
9  
10 769 81. Koszycki D, Bisserbe J, Blier P, Bradwejn J, Markowitz J. Interpersonal psychotherapy versus  
11  
12 770 brief supportive therapy for depressed infertile women: First pilot randomized controlled trial. *Ar-*  
13  
14 771 *chives of Women's Mental Health.* 2012;15(3):193-201.  
15  
16  
17 772 82. Galletly C, Clark A, Tomlinson L, Blaney F. Improved pregnancy rates for obese, infertile  
18  
19 773 women following a group treatment program: An open pilot study. *General Hospital Psychiatry.*  
20  
21 774 1996;18(3):192-195.  
22  
23  
24  
25 775 83. Cousineau TM, Green TC, Corsini E, et al. Online psychoeducational support for infertile wom-  
26  
27 776 en: A randomized controlled trial. *Hum Reprod.* 2008;23(3):554-566.  
28  
29  
30  
31 777 84. Noorbala AA, Ramazanzadeh F, Malekafzali H, et al. Effects of a psychological intervention on  
32  
33 778 depression in infertile couples. *Int J Gynecol Obstet.* 2008;101(3):248-252.  
34  
35  
36 779 85. Sexton MB, Byrd MR, O'Donohue WT, Jacobs NN. Web-based treatment for infertility-related  
37  
38 780 psychological distress. *Arch Women's Ment Health.* 2010;13(4):347-358.  
39  
40  
41  
42 781 86. Sarrel PM, DeCherney AH. Psychotherapeutic intervention for treatment of couples with sec-  
43  
44 782 ondary infertility. *Fertil Steril.* 1985;43(6):897-900.  
45  
46  
47 783 87. Hosaka T, Matsubayashi H, Sugiyama Y, Izumi S, Makino T. Effect of psychiatric group inter-  
48  
49 784 vention on natural-killer cell activity and pregnancy rate. *Gen Hosp Psychiatry.* 2002;24(5):353-  
50  
51 785 356.  
52  
53  
54  
55  
56  
57  
58  
59  
60

- 1  
2 786 88. Levitas E, Parmet A, Lunenfeld E, et al. Impact of hypnosis during embryo transfer on the out-  
3  
4 787 come of in vitro fertilization-embryo transfer: A case-control study. *Fertil Steril*. 2006;85(5):1404-  
5  
6 788 1408. doi: 10.1016/j.fertnstert.2005.10.035.  
7  
8  
9  
10 789 89. Domar AD, Rooney KL, Wiegand B, et al. Impact of a group mind/body intervention on preg-  
11  
12 790 nancy rates in IVF patients. *Fertil Steril*. 2011;95(7):2269-2273. doi:  
13  
14 791 <http://dx.doi.org/10.1016/j.fertnstert.2011.03.046>.  
15  
16  
17 792 90. Gorayeb R, Borsari AC, Rosa-e-Silva AC, Ferriani RA. Brief cognitive behavioral intervention  
18  
19 793 in groups in a brazilian assisted reproduction program. *Behav Med*. 2012;38(2):29-35. doi:  
20  
21 794 10.1080/08964289.2012.654834; 10.1080/08964289.2012.654834.  
22  
23  
24  
25 795 91. Terzioglu F. Investigation into effectiveness of counseling on assisted reproductive techniques  
26  
27 796 in turkey. *J Psychosom Obstet Gynecol*. 2001;22(3):133-141.  
28  
29  
30  
31 797 92. de Klerk C, Hunfeld JAM, Duivenvoorden HJ, et al. Effectiveness of a psychosocial counselling  
32  
33 798 intervention for first-time IVF couples: A randomized controlled trial. *Hum Reprod*.  
34  
35 799 2005;20(5):1333-1338.  
36  
37  
38  
39 800 93. Vizheh M, Pakgohar M, Babaei G, Ramezanzadeh F. Effect of counseling on quality of marital  
40  
41 801 relationship of infertile couples: A randomized, controlled trial (RCT) study. *Arch Gynecol Obstet*.  
42  
43 802 2013;287(3):583-589.  
44  
45  
46  
47 803 94. Chan CH, Chan CL, Ng EH, et al. Incorporating spirituality in psychosocial group intervention  
48  
49 804 for women undergoing in vitro fertilization: A prospective randomized controlled study. *Psychol*  
50  
51 805 *Psychother*. 2012;85(4):356-373.  
52  
53  
54  
55 806 95. Domar A, Clapp D, Slawsby E, Dusek J, Kessel B, Freizinger M. Impact of group psychological  
56  
57 807 interventions on pregnancy rates in infertile women. *Fertil Steril*. 2000;73(4):805-811. doi:  
58  
59 808 10.1016/S0015-0282(99)00493-8.  
60

- 1  
2 809 96. McNaughton-Cassill M, Bostwick JM, Arthur NJ, Robinson RD, Neal GS. Efficacy of brief  
3  
4 810 couples support groups developed to manage the stress of in vitro fertilization treatment. *Mayo Clin*  
5  
6 811 *Proc.* 2002;77(10):1060-1066.  
7  
8 812 <http://search.ebscohost.com/login.aspx?direct=true&db=c8h&AN=2003034100&site=ehost-live>.  
9  
10  
11 813 97. Galhardo A, Cunha M, Pinto-Gouveia J. Developing mindfulness and acceptance skills in infer-  
12  
13 814 tility: The mindfulness based program for infertility. *Aten Prim.* 2013;45:143.  
14  
15  
16  
17 815 98. Chen JH, Bierhals AJ, Prigerson HG, Kasl SV, Mazure CM, Jacobs S. Gender differences in the  
18  
19 816 effects of bereavement-related psychological distress in health outcomes. *Psychol Med.*  
20  
21 817 1999;29(2):367-380.  
22  
23  
24  
25 818 99. Navot D, Bergh RA, Williams MA, et al. Poor oocyte quality rather than implantation failure as  
26  
27 819 a cause of age-related decline in female fertility. *The Lancet.* 1991;337(8754):1375-1377. doi:  
28  
29 820 [http://dx.doi.org/10.1016/0140-6736\(91\)93060-M](http://dx.doi.org/10.1016/0140-6736(91)93060-M).  
30  
31  
32  
33 821 100. Dunson DB, Colombo B, Baird DD. Changes with age in the level and duration of fertility in  
34  
35 822 the menstrual cycle. *Human Reproduction.* 2002;17(5):1399-1403. doi: 10.1093/humrep/17.5.1399.  
36  
37  
38  
39 823 101. Van den Broeck U, Emery M, Wischmann T, Thorn P. Counselling in infertility: Individual,  
40  
41 824 couple and group interventions. *Patient Educ Couns.* 2010;81(3):422-428. doi:  
42  
43 825 10.1016/j.pec.2010.10.009.  
44  
45  
46 826 102. Burns LH, Covington SN. *Infertility counseling: A comprehensive handbook for clinicians.*  
47  
48 827 New York, NY, US: Parthenon Publishing Group; 1999:xvii.  
49  
50  
51  
52 828 103. Boivin J, Appleton TC, Baetens P, et al. Guidelines for counselling in infertility: Outline ver-  
53  
54 829 sion. *Hum Reprod.* 2001;16(6):1301-1304.  
55  
56  
57  
58  
59  
60

- 1  
2 830 104. Boivin J, Kantenich H, eds. *Guidelines for counselling in infertility*. ESHRE Monographs: Ox-  
3  
4 831 ford University Press; 2002.  
5  
6  
7 832 105. Gameiro S, Boivin J, Domar A. Optimal in vitro fertilization in 2020 should reduce treatment  
8  
9 833 burden and enhance care delivery for patients and staff. *Fertil Steril*. 2013;100(2):302-309. doi:  
10  
11 834 10.1016/j.fertnstert.2013.06.015 [doi].  
12  
13  
14  
15  
16  
17  
18  
19  
20  
21  
22  
23  
24  
25  
26  
27  
28  
29  
30  
31  
32  
33  
34  
35  
36  
37  
38  
39  
40  
41  
42  
43  
44  
45  
46  
47  
48  
49  
50  
51  
52  
53  
54  
55  
56  
57  
58  
59  
60

For peer review only

1 **Title Page****Efficacy of psychosocial interventions for psychological and pregnancy outcomes in infertile women and men: A systematic review and meta-analysis**

Yoon Frederiksen, Ingeborg Farver-Vestergaard, Ninna Grønhøj Skovgård, Hans Jakob Ingerslev, Robert Zachariae

Unit for Psychooncology and Health Psychology, Department of Psychology, University of Aarhus, 8000 Aarhus, Denmark Yoon Frederiksen MSc. Psychology, PhD-fellow Unit for Psychooncology and Health Psychology, Department of Psychology and Behavioural Science, University of Aarhus, 8000 Aarhus, Denmark Ingeborg Farver-Vestergaard MSc., Psychology, PhD-fellow Unit for Psychooncology and Health Psychology, Department of Psychology and Behavioural Science, Aarhus University, 8000 Aarhus, Denmark Ninna Grønhøj Skovgaard, research assistant, Skejby Fertility Clinic, Aarhus University Hospital, 8200 Aarhus Denmark. Hans Jakob Ingerslev, Professor, MD, DMSc, Unit for Psychooncology and Health Psychology, Department of Psychology, Aarhus University, 8000 Aarhus, Denmark Department of Oncology, Aarhus University Hospital, 8000 Aarhus Denmark Robert Zachariae, DMSci., professor.

Correspondence to: Yoon Frederiksen [yoanf@psy.au.dk](mailto:yoanf@psy.au.dk) Phone no. +45 8716 5872

Keywords: infertility/psychosocial intervention/distress/pregnancy

Word count: 4.852

Author statement: The Corresponding Author has the right to grant on behalf of all authors and does grant on behalf of all authors, an exclusive licence (or non exclusive for government employees) on a worldwide basis to the BMJ Publishing Group Ltd to permit this article (if accepted) to be published in BMJ editions and any other BMJ PGL products and sublicences such use and exploit all subsidiary rights, as set out in our licence.

Competing interest: All authors have completed the Unified Competing Interest form and are available upon request from the Corresponding Author

## 5 Abstract

6 **Objective:** To evaluate the evidence on the efficacy of psychosocial interventions for improving  
7 pregnancy rates and reducing distress for couples in treatment with assisted reproductive technology  
8 (ART).

9 **Design:** Systematic review and meta-analysis.

10 **Data sources** PsycINFO, PubMed, Embase, CINAHL, Web of Science and The Cochrane Library  
11 between 1978 and April 2014.

12 **Study selection** Studies were considered eligible if they evaluated the effect of any psychosocial  
13 intervention on clinical pregnancy and/or distress in infertile participants, used a quantitative ap-  
14 proach, and were published in English.

15 **Data extraction** Study characteristics and results were extracted and the methodological quality  
16 assessed. Effect sizes (Hedges  $g$ ) were pooled using a random effect model. Heterogeneity was as-  
17 sessed using the  $Q$  statistic and  $I^2$ , and publication bias evaluated using Eggers' method. Possible  
18 moderators and mediators were explored with meta-ANOVAs and meta-regression.

19 **Results** We identified 39 eligible studies (total  $N = 2746$  men and women) assessing the effects of  
20 psychological treatment on pregnancy rates and/or adverse psychological outcomes, including de-  
21 pressive symptoms, anxiety, infertility stress, and marital function. Statistically significant and ro-  
22 bust overall effects of psychosocial intervention were found for both clinical pregnancy ( $RR = 2.01$ ;  
23  $CI: 1.48-2.73$ ;  $p < 0.001$ ) and combined psychological outcomes (Hedges  $g = 0.59$ ;  $CI: 0.38-0.80$ ;  
24  $p = 0.001$ ). The pooled effect sizes (ES) for psychological outcomes were generally larger for wom-  
25 en ( $g: 0.51-0.73$ ) than men ( $0.13-0.34$ ), but the difference only reached statistical significance for  
26 depressive symptoms ( $p = 0.004$ ). Meta-regression indicated that larger reductions in anxiety were  
27 associated with greater improvement in pregnancy rates (Slope:  $0.19$ ;  $p = 0.004$ ). **No clear-cut differ-**  
28 **ences were found between effects of cognitive behavioral therapy (CBT) ( $g = 0.84$ ), mind-body in-**  
29 **terventions ( $0.61$ ), and other intervention types ( $0.50$ ).**

30 **Conclusion** The present meta-analysis suggests that psychosocial interventions for couples in  
31 treatment for infertility, in particular CBT, could be efficacious, both in reducing psychological  
32 distress and in improving clinical pregnancy rates.

33 **Strengths and limitations of this study**



- 34 • A major strength of this study is the extensive search of various databases from 1978 to  
35 April 2014, as well as a comprehensive methodological assessment
- 36 • Further analyses were performed to account for publication bias, yielding conservative ef-  
37 fect sizes and thus strengthening the robustness of the estimates
- 38 • Heterogeneity **and indications of publication bias were** observed for several of the outcomes
- 39 • Substantial variation of the methodological quality **and missing information on fertility and**  
40 **ART treatment** may limit the interpretability of the outcomes

## 41 Introduction

42 Fecundity has become a growing problem for many couples trying to conceive a child and although  
43 not all couples choose to seek medical assistance, more than 10% of the childbearing population has  
44 resorted to assisted reproductive technology (ART) to conceive.<sup>1-5</sup> Being involuntarily childless and  
45 going through various ART procedures imposes considerable stress on the couple, and childlessness  
46 is often perceived as a life crisis where the emotional strain equals that found for traumatic  
47 events.<sup>2,6-10</sup> Although infertile couples may be considered mentally healthy in general,<sup>11</sup> several  
48 studies indicate that coping with infertility is associated with periodically heightened levels of psy-  
49 chological symptoms of distress, depression and anxiety.<sup>12,13</sup> Feelings of loss, grief, anger, and sad-  
50 ness are not uncommon, and women often report bodily disparagement, lack of femininity, shame,  
51 and self-blame.<sup>2,14</sup> There is some evidence to suggest that dysregulation in the uterus microenvi-  
52 ronment may influence the ability to conceive, e.g. oxidative stress and inflammation,<sup>15,16</sup> which  
53 may be promoted by psychological distress.<sup>17,18</sup> Such findings have lead several studies to investi-  
54 gate possible links between mental state and pregnancy outcome.<sup>10,19-24</sup> Although the results have  
55 been mixed, reviews of the literature have generally reached the conclusion that psychosocial fac-  
56 tors such as depressive symptoms, anxiety, distress, and certain coping strategies are linked to re-  
57 duced chances of pregnancy.<sup>12,25,26</sup> Two recently published meta-analyses, however, report conflict-  
58 ing results.<sup>27,28</sup> Whereas one meta-analysis supported the conclusion that emotional distress may be  
59 critical to the success of fertility treatment outcome,<sup>27</sup> the other did not find sufficient support for

1  
2  
3 60 this hypothesis.<sup>28</sup> The different conclusions could be due to between-study methodological differ-  
4  
5 61 ences, e.g. in the chosen measures of distress and definitions of pregnancy (e.g. serum positive test,  
6  
7 62 clinical pregnancy, or live birth).  
8  
9

10 63 Nonetheless, the evidence indicating a considerable psychosocial burden associated with infertility  
11  
12 64 and its treatment has inspired several researchers to explore the effect of various psychosocial inter-  
13  
14 65 ventions in reducing distress, improving quality-of-life, and thereby, possibly, optimize the chances  
15  
16 66 of pregnancy. So far, three meta-analyses have reviewed effects of psychological interventions on  
17  
18 67 mental health and pregnancy outcome. Again, the results have been mixed. The first meta-analysis,  
19  
20 68 published in 2003, concluded that psychological intervention appeared to have a beneficial effect on  
21  
22 69 negative emotions,<sup>29</sup> particularly anxiety. An effect of counseling was also found for infertility-  
23  
24 70 related distress, whereas no clear effect was seen on pregnancy rates. Although the original system-  
25  
26 71 atic review identified 25 independent studies, the final meta-analysis only included 8–10 studies  
27  
28 72 selected on the basis of their methodological quality. The second meta-analysis published in 2005  
29  
30 73 focused on differences in effects related to intervention format, e.g. individual/couple vs. group  
31  
32 74 setting.<sup>30</sup> Overall, the results suggested that both individual/couple and group interventions were  
33  
34 75 effective in reducing emotional distress as well as increasing the conception rate. In contrast to the  
35  
36 76 two first meta-analyses, which had investigated both controlled and uncontrolled studies, the third  
37  
38 77 meta-analysis from 2009, which only included controlled studies,<sup>31</sup> found no evidence for an effect  
39  
40 78 of psychological interventions on emotional distress. An effect, however, was found for pregnancy  
41  
42 79 rates, but only for infertile couples not in ART.  
43  
44  
45  
46  
47  
48

49 80 Taken together, while showing promising results, the findings of existing quantitative systematic  
50  
51 81 reviews, the most recent published in 2009, are mixed. The literature within this field is expanding,  
52  
53 82 and studies of new psychosocial intervention approaches building on existing knowledge and target-  
54  
55 83 ing specific problems of infertile patients, e.g. mind/body interventions, web-based treatments, and  
56  
57 84 online psycho-education programs, have since been published. Furthermore, the more recently pub-  
58  
59  
60

1  
2  
3 85 lished studies have generally used randomized controlled trial designs, a notable strength reducing  
4  
5 86 the risk of bias and making the studies more easily comparable.<sup>32</sup> An updated review and meta-  
6  
7 87 analysis is needed to determine to which degree psychosocial interventions may reduce infertility  
8  
9  
10 88 related distress related to improvement of pregnancy chances during fertility treatment.

## 11 12 13 14 89 **Methods**

15  
16 90 The present study was conducted in accordance with the preferred reporting items for systematic  
17  
18 91 reviews and meta-analysis (PRISMA) recommendations.<sup>33,34</sup> An *a priori* designed study protocol  
19  
20  
21 92 guided the literature search, study selection, and data synthesis.

### 22 23 24 93 **Search strategy and criteria**

25  
26 94 A comprehensive and systematic search of the literature published between 1978 (first baby born  
27  
28 95 after in vitro fertilization) and April 2014 was conducted, using a sensitive search strategy recom-  
29  
30 96 mended for reviews by Higgins and Green.<sup>35</sup> When conducting the searches, we combined key-  
31  
32 97 words representing the two primary concepts, infertility and psychosocial treatment: (i) “infertil\*”,  
33  
34 98 “childlessness”, “IVF”, “ICSI”, “fertility treatment/problems” “assisted reproduction” and (ii) “psy-  
35  
36 99 chological/psychosocial intervention”, “social support”, “couples therapy”, “psycho-education”,  
37  
38  
39 100 “internet-based intervention” and “behavioral therapy” (for a full search history, see appendix 1).  
40  
41 101 We identified relevant records by electronic searches in general medical and psychological data-  
42  
43 102 bases: PubMed, PsycINFO, The Cochrane Library, Embase, CINAHL, and Web of Science. Fur-  
44  
45 103 thermore, we cross-examined reference lists of the retrieved papers and reviews for additional rele-  
46  
47 104 vant studies. We did not pursue the grey literature or trial registries, and limited our search to in-  
48  
49 105 clude only peer-reviewed articles published in English.

### 50 51 52 53 106 **Study selection**

54  
55 107 Studies were considered eligible if they 1) reported data on infertile participants 2) presented data  
56  
57 108 on a psychosocial intervention or a supportive program 3) included both baseline and post-  
58  
59  
60

1  
2  
3 109 intervention measures of stress, distress or pregnancy outcome 4) used a quantitative research ap-  
4  
5 110 proach. In general terms, infertility refers to not being able to conceive for more than one year  
6  
7 111 without contraception (WHO, 2002). Despite this standard definition, a recent review has found  
8  
9 112 considerable between-study variation in definitions.<sup>36</sup> Furthermore, infertility can be graded in rela-  
10  
11 113 tion to clinical diagnosis and duration. The present meta-analysis reviews studies using several dif-  
12  
13 114 ferent definitions of the term “infertile”, and includes all studies of patients diagnosed with different  
14  
15 115 types of infertility and in different types and stages of ART treatments, e.g. intrauterine insemina-  
16  
17 116 tion (IUI), in vitro fertilization (IVF), and intracytoplasmic sperm injection (ICSI). “Psychosocial  
18  
19 117 interventions or supportive programs” were defined as all interventions with a psychosocial aim that  
20  
21 118 did not include the prescription of medication had a primary physical focus, e.g. acupuncture or  
22  
23 119 massage therapy. However, studies using “psychophysiological” approaches, e.g. relaxation, guided  
24  
25 120 imagery or meditation exercises as part of a psychosocial program, were included. The interven-  
26  
27 121 tions could be delivered in individual-, group-, couples-, or internet-based format. We included both  
28  
29 122 controlled and uncontrolled trial studies, but chose to exclude expert opinion, magazines, commen-  
30  
31 123 taries, case reports, editorials, newspaper articles, newsletters, and books chapters. Neither did we  
32  
33 124 include abstracts-only, doctoral theses, or conference presentations. Our primary outcome was  
34  
35 125 pregnancy rate, defined as *clinical pregnancy*. This clinical definition implies a visualization of at  
36  
37 126 least one gestational sack and fetal heartbeat in approximately the 5<sup>th</sup> week after fertilization. Sec-  
38  
39 127 ondary outcome measures were psychological ratings of depressive symptoms, anxiety, generalized  
40  
41 128 stress, specific infertility stress, and interpersonal functioning assessed through self-reported ques-  
42  
43 129 tionnaires.

### 50 **Data extraction and quality assessment**

51  
52 131 All full-text articles were read by two independent review authors (IFV, NGS) and the data extract-  
53  
54 132 ed according to predefined criteria. Disagreements were discussed with a third author (YF) and re-  
55  
56 133 solved by consensus. If information on any outcome was missing or if clarifications were needed,  
57  
58  
59  
60

1  
2  
3 134 authors were contacted for further information. Each study was assessed for methodological quality  
4  
5 135 using the Jadad criteria,<sup>37</sup> a commonly used tool to evaluate methodological quality, e.g. use and  
6  
7 136 adequate description of randomization- and blinding procedures, and description of drop-out rates  
8  
9  
10 137 (score range: 0-5). In addition to the 0-5 points possible on the original Jadad scale, one additional  
11  
12 138 point was given for each of the following: (a) *was a control group included*; in order to  
13  
14 139 acknowledge whether the intervention group was compared with another group, although randomi-  
15  
16 140 zation was not used, (b) *were both pre- and post-data presented*; as including both pre- and post-  
17  
18 141 intervention data will provide more accurate results. (c) *Was any form of blinding or masking of*  
19  
20 142 *conditions to patients, or (d) blinding of researchers attempted*; acknowledging if the study had  
21  
22 143 attempted to masking the active condition, (e) *was a standardized and reliable outcome measure*  
23  
24 144 *used*; a criterion increasing the validity and comparability of the outcomes, and (f) *were pre-post*  
25  
26 145 *correlations provided*; which could provide better estimates of the effect size. The modified scale  
27  
28 146 yielded a total quality score ranging from 0-11. With respect to the modified quality score, the mean  
29  
30 147 score difference between Rater 1 and 2 (means (SD): 5.2 (1.8) and 5.6 (2.0)) did not reach statistical  
31  
32 148 significance ( $t(77) = 1.1$ ;  $p = 0.28$ ), and the inter-rater score correlation was  $r = 0.83$  ( $p < 0.001$ ).  
33  
34 149 Kappa statistic was not used, as this assumes the nominal data and no natural ordering of ratings.  
35  
36 150 Quality ratings were not used as weights when calculating aggregated effect sizes (ES) as this is  
37  
38 151 generally discouraged due to the risk of introducing additional bias.<sup>38</sup> Instead, associations between  
39  
40 152 ESs and study quality indicators were explored with meta-ANOVAs (design) and meta-regression  
41  
42 153 (modified quality-score). In cases where we were unable to retrieve articles from the authorized  
43  
44 154 databases, authors were contacted between 1-3 times in order to amend the data collected.  
45  
46  
47  
48  
49  
50  
51  
52  
53  
54  
55  
56  
57  
58  
59  
60

## 155 **Calculating effect sizes**

156 The effect sizes (ESs) used were the risk ratio (RR) for pregnancy and Hedges  $g$  for psychological  
157 outcomes. Hedges'  $g$  is a variation of Cohen's  $d$  which enables correction of potential bias due to  
158 small sample size.<sup>39,40</sup> A positive Hedges'  $g$  indicates result in the expected direction, e.g. a reduc-  
159 tion in distress in the intervention group compared to controls. A  $RR > 1.0$  indicates a greater pro-  
160 portion of pregnancies in the intervention group. RRs were based on pregnancy rates and total  $N$  in  
161 the intervention and control groups ( $k=10$ ) ( $k$  = number of studies). When possible, Hedges'  $g$  was  
162 calculated on the basis of reported means and SDs at pre and post-intervention or means and SDs of  
163 change scores. This was possible for 50 of 61 effect sizes. When required and available, the report-  
164 ed pre-post correlations were used in the calculation. This was the case for 5 ES's. When unavaila-  
165 ble, the pre-post correlation was set to 0.50. When SDs were unavailable, two approaches were  
166 used. For STAI state anxiety scores, the average pre- and post SDs (10.9 and 10.8) for the studies  
167 which reported the SD was used, as the SDs appeared to be highly comparable across the remaining  
168 studies. For other measures, ESs were estimated either on the basis of sample size and either  $p$ -  
169 value or Eta square. In one study reporting only medians,<sup>41</sup> the means and SDs were estimated fol-  
170 lowing a previously suggested approach.<sup>42</sup>

## 171 **Heterogeneity**

172 Heterogeneity was assessed using  $Q$  and  $I^2$  statistics. Heterogeneity tests are aimed at determining  
173 whether results reflect genuine between-study differences (heterogeneity), or whether the variation  
174 is due to chance (homogeneity).<sup>43</sup> In accordance with recommendations, a  $p$ -value  $\leq 0.10$  was used  
175 to determine significant heterogeneity due to the general low statistical power of heterogeneity  
176 tests.<sup>44</sup> The  $I^2$  quantity provides a measure of the degree of inconsistency by estimating the amount  
177 of variance in a pooled ES that can be accounted for by heterogeneity in the sample of studies.<sup>45</sup>  $I^2$   
178 values of 0%, 25%, 50%, and 75% indicate no, low, moderate, and high heterogeneity, respectively.

### 179 **Analytical strategy**

180 All ESs were weighted with the inverse variance and combined with a random effects model. First,  
181 the overall ES of the effect of psychosocial interventions on pregnancy rates was calculated. Then  
182 the overall ES for the combined psychological outcomes was calculated together with the overall  
183 ESs for the individual outcome measures of depression, state anxiety, infertility-related distress, and  
184 marital function. This was done for the combined sample (women + men). If the results indicated  
185 study heterogeneity, and if the number of studies in each category was sufficient ( $K \geq 3$ ), possible  
186 between-study differences in ESs were explored by comparing the ESs of studies according to the  
187 following study characteristics: gender, study design, intervention type, and intervention format  
188 (mixed effect meta-ANOVAs), methodological quality (modified quality score), mean age of the  
189 sample, intervention duration, and number of sessions (mixed effect meta-regression).

190 Prior to the search, statistical power analyses were conducted as previously recommended.<sup>46</sup> Based  
191 on the findings of the earlier meta-analysis,<sup>31</sup> we expected to find a RR of 1.4 for pregnancy rates  
192 and an average sample size of  $N=76$ . We expected to be able to detect a similar small ES (Hedges  $g$   
193 = 0.28 or RR = 1.4) with an alpha of 5% and a statistical power of 80%, with a total of only 9 stud-  
194 ies, using a random-effects model. Based on these results, we considered it worthwhile to conduct  
195 the meta-analysis. The calculations were conducted using Comprehensive Meta-Analysis, Version 2  
196 ([www.meta-analysis.com](http://www.meta-analysis.com)), IBM SPSS-20, and various formulas in Microsoft Excel.

### 197 **Publication bias**

198 The possibility of publication bias, a widespread problem when conducting meta-analyses, was  
199 evaluated with funnel plots,<sup>47</sup> Egger's method, and by calculating fail-safe numbers.<sup>48,49</sup> A funnel  
200 plot is a graphic illustration of study ESs in relation to study size or precision. Egger's test provides  
201 a statistic for the skewness of results.<sup>50</sup> Calculation of fail-safe numbers is aimed at achieving an  
202 indication of the number of unpublished studies with null-findings that would reduce the result to  
203 statistical non-significance ( $p > 0.05$ ). It has been suggested that a reasonable level is achieved if the

1  
2  
3 204 fail-safe number exceeds  $5K+10$  ( $K = N$  studies in the meta-analysis).<sup>51</sup> If the results were sugges-  
4  
5 205 tive of publication bias, an adjusted ES was calculated using Duval and Tweedie's trim and fill  
6  
7 206 method,<sup>52</sup> which imputes ESs of missing studies and recalculates the ES accordingly.

## 11 207 **Results**

### 14 208 **Study selection**

17 209 In a first screening, duplicates were identified, and titles and abstracts reviewed. A total of 157 stud-  
18  
19 210 ies were found potentially relevant and reviewed independently by two raters. Four articles could  
20  
21 211 not be retrieved due to "no access" policy from the university, and the authors did not respond to  
22  
23 212 our enquiries.<sup>53-56</sup> Initially, the raters were uncertain or disagreed on 13 (8.3%) articles (inter-rater  
24  
25 213 agreement: 0.78;  $p < 0.001$  (Kappa statistic)) indicating "substantial agreement."<sup>57</sup> After negotiation,  
26  
27 214 5 of these were included, resulting in 41 potentially eligible articles. One additional study was ex-  
28  
29 215 cluded due to the combination of psychological intervention with a psychoactive drug, and one  
30  
31 216 study had insufficient statistical data and the authors did not respond to our enquiry. We thus in-  
32  
33 217 cluded a total of 39 studies in the present review. On three occasions authors provided unpublished  
34  
35 218 additional data.<sup>58-60</sup> Figure 1 shows a flow chart of the study selection process.

38  
39  
40 219 (Insert Figure 1 near here)

### 43 220 **Study characteristics**

45 221 **The study characteristics are summarized in Table 1.** Based on outcome, 29 of the studies were aimed at  
46  
47 222 reducing negative emotional distress,<sup>41,58-85</sup> with the targeted outcomes being infertility-related distress  
48  
49 223 ( $k=10$ ), depression ( $k=21$ ), anxiety ( $k=25$ ), and marital function ( $k=5$ ). Five studies focused solely on the  
50  
51 224 outcome of pregnancy,<sup>86-90</sup> and 5 studies had included distress as well as pregnancy as outcome.<sup>78,91-94</sup> **Twen-**  
52  
53 225 **ty-one studies were randomized controlled trials (RCTs),<sup>58,61,65-72,74,75,83,85,89-95</sup> and ten studies were non-**  
54  
55 226 **randomized controlled studies (NRCTs),<sup>41,59,60,76,79,80,86-88,96</sup> with most control groups receiving standardized**  
56  
57 227 **care or being waiting-list controls.** Only three studies had included an active/attention control condition, e.g.



1  
2  
3 228 non-emotional writing or receiving an information booklet.<sup>70,71,74</sup> One study offered gift certificates to the  
4  
5 229 control group participants if they responded to the follow-up questionnaires.<sup>89</sup> Relatively few studies were  
6  
7 230 uncontrolled (UCT) (k= 8).<sup>62-64,73,77,81,82,84</sup> The reporting of the participants' medical treatment status was  
8  
9 231 inconsistent. Five studies did not provide information on treatment status (whether or not in current ART  
10  
11 232 treatment), 3 studies reported that some, but not how many, of the participants were in treatment, and 31  
12  
13 233 studies reported that their participants were currently in ART treatment, although not what kind of treatment  
14  
15 234 e.g. IUI, IVF/ICSI, or treatment cycle. The cause of infertility was also inconsistently reported, and some  
16  
17 235 participants may still have been under evaluation during the study period. Twenty-five studies had included  
18  
19 236 only women, while the remaining 14 studies had included both women and men. The included studies had  
20  
21 237 reported data for a total of 3401 participants (3064 women and 347 men). The mean age and mean duration  
22  
23 238 of infertility for intervention group participants was (32.7 yrs. SD 2.2) and (4.6 yrs. SD 2.1) and for control  
24  
25 239 group participants (32.6 yrs. SD=1.7) and (5.1 yrs. SD=3.0). The specific intervention strategies mostly em-  
26  
27 240 ployed were cognitive behavioral therapy (k=8) and mind/body intervention (k=12). The remaining studies  
28  
29 241 had used a variety of interventions, including stress management, hypnosis, art therapy, expressive writing  
30  
31 242 intervention, crisis intervention, and various types of counseling. Some studies had included more than one  
32  
33 243 approach, e.g. cognitive behavioral approaches supplemented with mind-body techniques such as relaxation.  
34  
35 244 To be categorized as mind/body intervention, a study had to use such strategies as the general approach over  
36  
37 245 the course of intervention. Thus, if studies had mainly used cognitive behavioral therapy strategies and only  
38  
39 246 incorporated other approaches, e.g., relaxation exercises, in one or two sessions, they were categorized as  
40  
41 247 cognitive behavioral therapy interventions. The number of sessions ranged from 1 to 24, lasting approxi-  
42  
43 248 mately from 20 minutes to 3 hours and the duration of psychosocial intervention ranged from 1 week to 28  
44  
45 249 months.

#### 250 *Attrition*

251 A total of 15 studies reported the number of participants at baseline and then again at follow-up, and  
252 as seen in Table 1, dropout varied across studies. Although the dropout rates in the intervention  
253 groups were somewhat higher (Mean: 30.5% (SD: 20.2)) than in controls (24.9% (24.8)), the differ-  
254 ence did not reach statistical significance (t(28):0.68, p=0.50). Furthermore, only four studies ex-

1  
2  
3 255 plicitly stated that the analysis was based on an intention-to-treat (ITT) approach.<sup>70,72,83,92</sup> Two addi-  
4  
5 256 tional studies used methods comparable to ITT, e.g. carrying last (baseline) observations forward or  
6  
7 257 use of multilevel linear modeling.<sup>69,97</sup> Four studies stated that there were no differences between  
8  
9 258 completers and dropouts without specifying this further,<sup>41,64,81,85</sup> and the remaining studies failed to  
10  
11 259 report whether there were dropouts or how such missing data were dealt with. The possible associa-  
12  
13 260 tion between ESs and uneven dropout in the intervention and control groups was analyzed for the  
14  
15 261 15 studies that reported dropout by regressing the difference in dropout rates on the overall ESs  
16  
17 262 across all outcomes. The result indicated that larger dropouts in the intervention group compared  
18  
19 263 were generally associated with smaller ES's (Slope = -0.02), but the association did not reach statis-  
20  
21 264 tical significance (p = 0.268).  
22  
23  
24  
25  
26  
27  
28  
29  
30  
31  
32  
33  
34  
35  
36  
37  
38  
39  
40  
41  
42  
43  
44  
45  
46  
47  
48  
49  
50  
51  
52  
53  
54  
55  
56  
57  
58  
59  
60

1  
2  
3  
4 266  
5  
6  
7 267  
8  
9  
10  
11  
12  
13  
14  
15  
16  
17  
18  
19  
20  
21  
22  
23  
24  
25  
26  
27  
28  
29  
30  
31  
32  
33  
34  
35  
36  
37  
38  
39  
40  
41  
42  
43  
44  
45  
46  
47  
48  
49

**Table 1. Characteristics of included studies**

| Author                    | Country     | Participants (N)<br>I: Intervention<br>C: Control<br>assigned<br>(final analysis)<br>(men %) | Study design <sup>a</sup> | Intervention type <sup>b</sup>              | Intervention category <sup>c</sup> | Intervention format | Number of sessions | Intervention duration (weeks) | Outcome: Psychological <sup>d</sup><br>IS: Infertility stress<br>A: Anxiety<br>D: Depression<br>MF: Marital function | Outcome: Pregnancy <sup>e</sup> (+/-) | Quality score <sup>f</sup><br>J: Jadad 0-5<br>MJ: Modified Jadad 0-12<br>J (MJ) |
|---------------------------|-------------|----------------------------------------------------------------------------------------------|---------------------------|---------------------------------------------|------------------------------------|---------------------|--------------------|-------------------------------|----------------------------------------------------------------------------------------------------------------------|---------------------------------------|---------------------------------------------------------------------------------|
| O'Moore et al. 1983       | Ireland, UK | I: 30 (22) (50 %)<br>C: 20 (20) (50 %)                                                       | NRCT                      | Autogenic training                          | MBI                                | Group               | 8                  | 8                             | D: BDI<br>A: STAI                                                                                                    | -                                     | 1 (4)                                                                           |
| Lukse 1985                | USA         | I: 29 (29 (14))                                                                              | UCT                       | Counseling                                  | Other                              | Group               | 6                  | 6                             | D: DES                                                                                                               | -                                     | 0 (3)                                                                           |
| Sarrel and DeCherney 1985 | USA         | I: 20 (10)<br>C: 20 (9)                                                                      | NRCT                      | Psychotherapeutic interview                 | Other                              | Couples             | 1                  | 1                             |                                                                                                                      | +                                     | 0 (1)                                                                           |
| Domar et al. 1990         | USA         | I: 54 (54)                                                                                   | UCT                       | Mind/Body program                           | MBI                                | Group               | 10                 | 10                            | A: STAI                                                                                                              | -                                     | 0 (3)                                                                           |
| Domar et al. 1992         | USA         | I: 52 (41)                                                                                   | UCT                       | Behavioral Medicine Program for Infertility | MBI                                | Group               | 10                 | 10                            | A: STAI                                                                                                              | -                                     | 1 (3)                                                                           |
| Galletly et al. 1996      | Australia   | I: 37 (37)                                                                                   | UCT                       | Treatment program                           | Other                              | Group               | 24                 | 24                            | D: HADS<br>A: HADS                                                                                                   | -                                     | 1 (3)                                                                           |
| McQueeney et al. 1997     | USA         | I: 20 (20)<br>C: 9 (9)                                                                       | NRCT                      | Emotion- and problem-focused therapies      | Other                              | Group               | 6                  | 6                             | IS: ISD<br>D: BDI                                                                                                    | -                                     | 3 (7)                                                                           |

|    |                           |                  |                                                      |      |                                     |       |            |       |     |                              |   |        |
|----|---------------------------|------------------|------------------------------------------------------|------|-------------------------------------|-------|------------|-------|-----|------------------------------|---|--------|
| 1  |                           |                  |                                                      |      |                                     |       |            |       |     |                              |   |        |
| 2  |                           |                  |                                                      |      |                                     |       |            |       |     |                              |   |        |
| 3  |                           |                  |                                                      |      |                                     |       |            |       |     |                              |   |        |
| 4  | Tuschen-Caffier et al.    | Germany          | I: 34 (22)<br>C: 24 (24)                             | NRCT | Cognitive-behavioral therapy        | CBT   | Couples    | 10-12 | 32  | IS: one item<br>MF: one item | - | 1 (4)  |
| 5  | 1999                      |                  |                                                      |      |                                     |       |            |       |     |                              |   |        |
| 6  |                           |                  |                                                      |      |                                     |       |            |       |     |                              |   |        |
| 7  | Domar et al.              | USA              | I: 56 (20)<br>C: 63 (14)                             | RCT  | Psychological intervention          | MBI   | Group      | 10    | 10  | D: BDI<br>A: STAI            | + | 4 (10) |
| 8  | 2000                      |                  |                                                      |      |                                     |       |            |       |     |                              |   |        |
| 9  |                           |                  |                                                      |      |                                     |       |            |       |     |                              |   |        |
| 10 | Terzioglu                 | Turkey           | I: 60 (60)<br>(50 %)<br>C: 60 (60)<br>(50 %)         | RCT  | Counseling                          | Other | Individual | 5     | 5   | D: BDI<br>A: STAI            | + | 2 (5)  |
| 11 | 2001                      |                  |                                                      |      |                                     |       |            |       |     |                              |   |        |
| 12 |                           |                  |                                                      |      |                                     |       |            |       |     |                              |   |        |
| 13 |                           |                  |                                                      |      |                                     |       |            |       |     |                              |   |        |
| 14 | Hosaka et al.             | Japan            | I: 37 (37)<br>C: 37 (37)                             | NRCT | Structured intervention             | MBI   | Group      | 5     | 5   |                              | + | 3 (6)  |
| 15 | 2002                      |                  |                                                      |      |                                     |       |            |       |     |                              |   |        |
| 16 | McNaughton-Cassill et al. | USA              | I: 43 (43)<br>(39.5 %)<br>C: 37 (37)<br>(48.6 %)     | NRCT | Couples support                     | CBT   | Couples    | 6     | 3   | D: BDI<br>A: BAI             | - | 2 (5)  |
| 17 | 2002                      |                  |                                                      |      |                                     |       |            |       |     |                              |   |        |
| 18 |                           |                  |                                                      |      |                                     |       |            |       |     |                              |   |        |
| 19 | Emery et al.              | Switzerland      | I: 158 (110)<br>(34.8 %)<br>C: 152 (131)<br>(42.8 %) | RCT  | Pre-IVF counseling                  | Other | Couples    | 1     | 1   | D: BDI<br>A: STAI            | - | 3 (6)  |
| 20 | 2003                      |                  |                                                      |      |                                     |       |            |       |     |                              |   |        |
| 21 |                           |                  |                                                      |      |                                     |       |            |       |     |                              |   |        |
| 22 |                           |                  |                                                      |      |                                     |       |            |       |     |                              |   |        |
| 23 | Lee                       | Taiwan           | I: 64 (64)<br>C: 68(68)                              | RCT  | Nursing crisis intervention program | MBI   | Individual | 7     | 7   | D: SDS<br>A: STAI            | - | 1 (4)  |
| 24 | 2003                      |                  |                                                      |      |                                     |       |            |       |     |                              |   |        |
| 25 |                           |                  |                                                      |      |                                     |       |            |       |     |                              |   |        |
| 26 |                           |                  |                                                      |      |                                     |       |            |       |     |                              |   |        |
| 27 |                           |                  |                                                      |      |                                     |       |            |       |     |                              |   |        |
| 28 |                           |                  |                                                      |      |                                     |       |            |       |     |                              |   |        |
| 29 | De Klerk et al.           | The Netherlands  | I: 22 (18)<br>C: 22 (15)                             | RCT  | Counseling                          | Other | Group      | 3     | 4-5 | D: HADS<br>A: HADS           | + | 3 (6)  |
| 30 | 2005                      |                  |                                                      |      |                                     |       |            |       |     |                              |   |        |
| 31 |                           |                  |                                                      |      |                                     |       |            |       |     |                              |   |        |
| 32 | Schmidt et al.            | Denmark          | I: 13 (13)<br>C: 435 (435)                           | NRCT | Stress management                   | Other | Group      | 5     | 6   | IS: COMPI                    | - | 1 (4)  |
| 33 | 2005                      |                  |                                                      |      |                                     |       |            |       |     |                              |   |        |
| 34 | Chan et al.               | Hong Kong, China | I: 101 (69)<br>C: 126 (115)                          | RCT  | The Eastern body-mind intervention  | MBI   | Group      | 4     | 4   | A: STAI                      | - | 3 (7)  |
| 35 | 2006                      |                  |                                                      |      |                                     |       |            |       |     |                              |   |        |
| 36 |                           |                  |                                                      |      |                                     |       |            |       |     |                              |   |        |
| 37 | Levitas et al.            | Israel           | I: 89 (89)<br>C: 96 (96)                             | NRCT | Hypnosis                            | MBI   | Individual | 1     | 1   |                              | + | 0 (1)  |
| 38 | 2006                      |                  |                                                      |      |                                     |       |            |       |     |                              |   |        |
| 39 |                           |                  |                                                      |      |                                     |       |            |       |     |                              |   |        |
| 40 |                           |                  |                                                      |      |                                     |       |            |       |     |                              |   |        |
| 41 |                           |                  |                                                      |      |                                     |       |            |       |     |                              |   |        |
| 42 |                           |                  |                                                      |      |                                     |       |            |       |     |                              |   |        |
| 43 |                           |                  |                                                      |      |                                     |       |            |       |     |                              |   |        |
| 44 |                           |                  |                                                      |      |                                     |       |            |       |     |                              |   |        |
| 45 |                           |                  |                                                      |      |                                     |       |            |       |     |                              |   |        |
| 46 |                           |                  |                                                      |      |                                     |       |            |       |     |                              |   |        |
| 47 |                           |                  |                                                      |      |                                     |       |            |       |     |                              |   |        |
| 48 |                           |                  |                                                      |      |                                     |       |            |       |     |                              |   |        |
| 49 |                           |                  |                                                      |      |                                     |       |            |       |     |                              |   |        |

|    |                          |                 |              |     |                                   |       |            |          |    |            |   |       |
|----|--------------------------|-----------------|--------------|-----|-----------------------------------|-------|------------|----------|----|------------|---|-------|
| 1  |                          |                 |              |     |                                   |       |            |          |    |            |   |       |
| 2  |                          |                 |              |     |                                   |       |            |          |    |            |   |       |
| 3  |                          |                 |              |     |                                   |       |            |          |    |            |   |       |
| 4  | Nilforooshan et al.      | Iran            | I: 30 (30)   | RCT | Cognitive-behavioral counseling   | CBT   | Group      | 6        | 6  | D: BDI     | - | 2 (6) |
| 5  | 2006                     |                 | (50 %)       |     |                                   |       |            |          |    | A: BAI     |   |       |
| 6  |                          |                 | C: 30 (30)   |     |                                   |       |            |          |    |            |   |       |
| 7  |                          |                 | (50 %)       |     |                                   |       |            |          |    |            |   |       |
| 8  | Tuil et al.              | The Netherlands | I: 108 (102) | RCT | Internet-based health record      | Other | Individual | Infinite | 2  | D: BDI     | - | 3 (6) |
| 9  | 2007                     |                 | (50 %)       |     |                                   |       |            |          |    | A: STAI    |   |       |
| 10 |                          |                 | C: 96 (78)   |     |                                   |       |            |          |    |            |   |       |
| 11 |                          |                 | (48.7 %)     |     |                                   |       |            |          |    |            |   |       |
| 12 | Cousineau et al.         | USA             | I: 96 (49)   | RCT | Psycho-educational support        | Other | Online     | 1-2      | 4  | IS: FPI    | - | 4 (8) |
| 13 | 2008                     |                 | C: 92 (49)   |     |                                   |       |            |          |    | MF: RDAS   |   |       |
| 14 |                          |                 |              |     |                                   |       |            |          |    |            |   |       |
| 15 | Faramarzi et al.         | Iran            | I: 42 (29)   | RCT | Cognitive-behavioral therapy      | CBT   | Group      | 10       | 10 | D: BDI     | - | 3 (6) |
| 16 | 2008                     |                 | C: 40 (30)   |     |                                   |       |            |          |    | A: Cattell |   |       |
| 17 |                          |                 |              |     |                                   |       |            |          |    |            |   |       |
| 18 | Lancastle and Boivin     | Wales, UK       | I:28 (28)    | RCT | Brief coping intervention         | Other | Individual | 14       | 2  | IS: CIQ    | - | 4 (8) |
| 19 | 2008                     |                 | C: 27 (27)   |     |                                   |       |            |          |    |            |   |       |
| 20 | Noorbala et al.          | Iran            | I: 288 (288) | UCT | Cognitive-behavioral therapy      | CBT   | Group      |          | 24 | D: BDI     | - | 3 (8) |
| 21 | 2008                     |                 | (50 %)       |     |                                   |       |            |          |    |            |   |       |
| 22 |                          |                 |              |     |                                   |       |            |          |    |            |   |       |
| 23 | Mori                     | Japan           | I: 85 (85)   | RCT | Stress management                 | Other | Individual | 3        | 12 | D: HADS    | - | 4 (8) |
| 24 | 2009                     |                 | C: 40 (40)   |     |                                   |       |            |          |    | A: HADS    |   |       |
| 25 | Panagopoulou et al.      | England, UK     | I: 50 (50)   | RCT | Expressive writing intervention   | Other | Individual | 3        | 1  | IS: ISS    | - | 3 (7) |
| 26 | 2009                     |                 | C: 98 (98)   |     |                                   |       |            |          |    | A: STAI    |   |       |
| 27 |                          |                 |              |     |                                   |       |            |          |    |            |   |       |
| 28 | Haemmerli et al.         | Switzerland     | I: 60 (46)   | RCT | Coaching and support              | Other | Online     | 13       | 8  | IS: IDS    | - | 3 (6) |
| 29 | 2010                     |                 | C: 64 (41)   |     |                                   |       |            |          |    | D: CES-D   |   |       |
| 30 |                          |                 |              |     |                                   |       |            |          |    | A: STAI    |   |       |
| 31 | Sexton et al.            | USA             | I: 21 (15)   | RCT | Web-based coping with infertility | Other | Individual |          | 2  | IS: FPI    | - | 3 (6) |
| 32 | 2010                     |                 | C: 22 (16)   |     |                                   |       |            |          |    |            |   |       |
| 33 |                          |                 |              |     |                                   |       |            |          |    |            |   |       |
| 34 | Domar et al.             | USA             | I: 46 (46)   | RCT | Mind/body program for infertility | MBI   | Group      | 10       | 10 |            | + | 4 (6) |
| 35 | 2011                     |                 | C: 51(51)    |     |                                   |       |            |          |    |            |   |       |
| 36 |                          |                 |              |     |                                   |       |            |          |    |            |   |       |
| 37 | Hughes and Mann de Silva | Canada          | I: 21 (21)   | UCT | Art therapy                       | Other | Group      | 8 (2hrs) | 8  | D: BDI     | - | 0 (2) |
| 38 |                          |                 |              |     |                                   |       |            |          |    | A: BAI     |   |       |
| 39 |                          |                 |              |     |                                   |       |            |          |    |            |   |       |
| 40 |                          |                 |              |     |                                   |       |            |          |    |            |   |       |
| 41 |                          |                 |              |     |                                   |       |            |          |    |            |   |       |
| 42 |                          |                 |              |     |                                   |       |            |          |    |            |   |       |
| 43 |                          |                 |              |     |                                   |       |            |          |    |            |   |       |
| 44 |                          |                 |              |     |                                   |       |            |          |    |            |   |       |
| 45 |                          |                 |              |     |                                   |       |            |          |    |            |   |       |
| 46 |                          |                 |              |     |                                   |       |            |          |    |            |   |       |
| 47 |                          |                 |              |     |                                   |       |            |          |    |            |   |       |
| 48 |                          |                 |              |     |                                   |       |            |          |    |            |   |       |
| 49 |                          |                 |              |     |                                   |       |            |          |    |            |   |       |

|    |                    |          |              |      |               |       |            |             |    |           |   |       |
|----|--------------------|----------|--------------|------|---------------|-------|------------|-------------|----|-----------|---|-------|
| 1  |                    |          |              |      |               |       |            |             |    |           |   |       |
| 2  |                    |          |              |      |               |       |            |             |    |           |   |       |
| 3  |                    |          |              |      |               |       |            |             |    |           |   |       |
| 4  | 2011               |          |              |      |               |       |            |             |    |           |   |       |
| 5  |                    |          |              |      |               |       |            |             |    |           |   |       |
| 6  | Chan et al.        | Hong     | I: 141 (141) | RCT  | Integrative   | MBI   | Group      | 4 (3hrs)    | 4  | A: STAI   | + | 3 (6) |
| 7  | 2012               | Kong,    | C: 110 (110) |      | body-mind-    |       |            |             |    | MF: C-KMS |   |       |
| 8  |                    | China    |              |      | spirit inter- |       |            |             |    |           |   |       |
| 9  |                    |          |              |      | vention       |       |            |             |    |           |   |       |
| 10 | Gorayeb et al.     | Brazil   | I: 93 (93)   | RCT  | Brief cogni-  | CBT   | Group      | 5 (2hrs)    | 5  |           | + | 1 (4) |
| 11 | 2012               |          | C: 95 (95)   |      | tive-         |       |            |             |    |           |   |       |
| 12 |                    |          |              |      | behavioral    |       |            |             |    |           |   |       |
| 13 |                    |          |              |      | intervention  |       |            |             |    |           |   |       |
| 14 | Koszycki et al.    | Canada   | I: 31 (23)   | UCT  | Interpersonal | Other | Individual | 12 (50min)  | 12 | IS: FPI   | - | 3 (7) |
| 15 | 2012               |          |              |      | and support-  |       |            |             |    | D: BDI    |   |       |
| 16 |                    |          |              |      | ive therapy   |       |            |             |    | HAM-D     |   |       |
| 17 | Matthiesen et al.  | Denmark  | I: 42 (15)   | RCT  | Expressive    | Other | Individual | 3 (20min)   | 1  | IS: COMPI | - | 4 (8) |
| 18 | 2012               |          | C: 40 (16)   |      | writing in-   |       |            |             |    |           |   |       |
| 19 |                    |          |              |      | tervention    |       |            |             |    |           |   |       |
| 20 | Mosalanejad et al. | Iran     | I: 32 (32)   | RCT  | Cognitive-    | CBT   | Group      | 12 (2hrs)   | 12 | D: DASS   | - | 1 (4) |
| 21 | 2012               |          | C: 33 (33)   |      | behavioral    |       |            |             |    | A: DASS   |   |       |
| 22 |                    |          |              |      | treatment     |       |            |             |    |           |   |       |
| 23 | Mosalanejad et al. | Iran     | I: 16 (16)   | NRCT | Cognitive-    | CBT   | Group      | 15 (1,5hrs) | 16 | D: DASS   | - | 2 (5) |
| 24 | 2012b              |          | C: 15 (15)   |      | behavioral    |       |            |             |    | A: DASS   |   |       |
| 25 |                    |          |              |      | therapy       |       |            |             |    |           |   |       |
| 26 | Catoire et al.     | France   | I: 50 (50)   | UCT  | Hypnosis      | MBI   | Individual | 4           | 1  | A: STAI   | - | 4 (7) |
| 27 | 2013               |          |              |      |               |       |            |             |    |           |   |       |
| 28 | Galhardo et al.    | Portugal | I: 55 (55)   | NRCT | Mindful-      | MBI   | Group      | 10 (2hrs)   | 10 | IS: ISE   | - | 1 (4) |
| 29 | 2013               |          | C: 37 (37)   |      | ness-based    |       |            |             |    | D: BDI    |   |       |
| 30 |                    |          |              |      | program for   |       |            |             |    | A: STAI   |   |       |
| 31 |                    |          |              |      | infertility   |       |            |             |    |           |   |       |
| 32 | Vizheh et al.      | Iran     | I: 86 (86)   | RCT  | Marital       | Other | Group      | 3 (1.5hrs)  | 3  | MF: MSQ   | + | 4 (8) |
| 33 | 2013               |          | (50 %)       |      | counseling    |       |            |             |    |           |   |       |
| 34 |                    |          | C: 94 (86)   |      |               |       |            |             |    |           |   |       |
| 35 |                    |          | (54.7 %)     |      |               |       |            |             |    |           |   |       |

a) RCT Randomized controlled trial, NRCT non-randomized controlled trial, UCT uncontrolled pre-post trial, NR Not reported.

b) Self-reported intervention type.

c) Intervention type: CBT (Cognitive behavioral therapy); MBI (Mind/body intervention): mindfulness, yoga, relaxation, imagery, hypnosis etc.; Other: all other intervention types, e.g. counseling, psycho-education, supportive therapy, expressive writing intervention, brief therapy, emotion and problem focused therapy, and narrative therapy.

1  
2  
3  
4 272  
5 273  
6 274  
7 275  
8 276  
9 277  
10 278  
11 279  
12 280  
13  
14 281  
15  
16  
17  
18  
19  
20  
21  
22  
23  
24  
25  
26  
27  
28  
29  
30  
31  
32  
33  
34  
35  
36  
37  
38  
39  
40  
41  
42  
43  
44  
45  
46  
47  
48  
49

- d) Outcome measures: **Infertility stress:** COMPI the Copenhagen Multi-centre Psychosocial Infertility Problem Stress scale, FPI Fertility Problem Index, *ISE* Infertility Self-efficacy Scale, *CIQ* the Coping with Infertility Questionnaire, *ISS* the Infertility and Strain Scale, *IDS* Infertility Distress Scale **Depression:** *BDI* the Beck Depression Inventory, *HADS* the Hospital Anxiety and Depression Scale, *CES-D* the Center for Epidemiologic Studies Depression – short version, *SDS* Zung’s Self-administered Depression Scale, *DASS* the Depression and Anxiety Stress Scale - depression **Anxiety:** *STAI* Spielberger State-Trait Anxiety Inventory, *BAI* the Beck Anxiety Inventory, *HAM-D* Hamilton Depression Rating Scale – subscale anxiety, *DASS* the Depression and Anxiety Stress Scale – anxiety, *Cattell* Cattell Anxiety Inventory **Marital function:** *C-KMS* Kansas Marital Satisfaction Scale – Chinese version *RDAS* Revised Dyadic Adjustment Scale – dyadic cohesion subscale, *MSQ* Marital Satisfaction Questionnaire.
- e) *Pregnancy* is defined as a clinical pregnancy; when heartbeat of the fetal sac is evident in the uterus with an ultrasound scan .
- f) *Jadad range 0-5* an assessment tool rating the quality and methodology of the studies included<sup>37</sup> and the *modified Jadad range 0-11 (total score)* included additional points for: inclusion of a control group, pre-post data, blinding of participants or researchers, use of standardized and reliable outcome measures and report of pre-post correlations.

For peer review only

1  
2 282 *Quality ratings*  
3

4 283 All included studies were methodologically assessed with both the original Jadad scale and the ad-  
5  
6 284 ditional methodological criteria. The original Jadad scores ranged from 0 to 4 with a mean of 2.28  
7  
8 285 (SD: 1.36), and the modified total quality scores ranged from 1 to 10 with a mean of 5.36 (SD:  
9  
10 286 2.05). The main methodological issue was that only very few studies attempted to blind or mask the  
11  
12 287 intervention conditions to either patients or researchers. The quality ratings for each criterion for  
13  
14 288 each study and total scores are shown in [Table 2](#).  
15  
16  
17  
18  
19  
20  
21  
22  
23  
24  
25  
26  
27  
28  
29  
30  
31  
32  
33  
34  
35  
36  
37  
38  
39  
40  
41  
42  
43  
44  
45  
46  
47  
48  
49  
50  
51  
52  
53  
54  
55  
56  
57  
58  
59  
60



1  
2  
3  
4  
5  
6  
7  
8  
9  
10  
11  
12  
13  
14  
15  
16  
17  
18  
19  
20  
21  
22  
23  
24  
25  
26  
27  
28  
29  
30  
31  
32  
33  
34  
35  
36  
37  
38  
39  
40  
41  
42  
43  
44  
45  
46  
47  
48  
49289 **Table 1 Modified Jadad scores (original Jadad criteria + 6 additional criteria)**

| Study                                       | Jadad criteria |              |                           |                            |                       |                            |                       | Additional criteria |                          |                     |                        |                                   |                      | Jadad        | Total        |
|---------------------------------------------|----------------|--------------|---------------------------|----------------------------|-----------------------|----------------------------|-----------------------|---------------------|--------------------------|---------------------|------------------------|-----------------------------------|----------------------|--------------|--------------|
|                                             | 1              | 2            | 3                         | 4                          | 5                     | 6                          | 7                     | a                   | b                        | C                   | d                      | e                                 | f                    |              |              |
|                                             | Randomized     | Double blind | Withdrawals and drop-outs | Randomization (evaluation) | Blinding (evaluation) | Randomization (evaluation) | Blinding (evaluation) | Control group       | Pre- and post-assessment | Blinding (patients) | Blinding (researchers) | Standardized and reliable outcome | Pre-post correlation | Jadad scores | Total scores |
| O'Moore et al., 1983                        | 0              | 0            | 1                         | 0                          | 0                     | 0                          | 0                     | 1                   | 1                        | 0                   | 0                      | 1                                 | 0                    | 1            | 4            |
| Lukse, 1985                                 | 0              | 0            | 0                         | 0                          | 0                     | 0                          | 0                     | 0                   | 1                        | 0                   | 0                      | 1                                 | 1                    | 0            | 3            |
| Sarrel et al., 1985                         | 0              | 0            | 0                         | 0                          | 0                     | 0                          | 0                     | 1                   | 0                        | 0                   | 0                      | 0                                 | 0                    | 0            | 1            |
| Domar et al., 1990                          | 0              | 0            | 0                         | 0                          | 0                     | 0                          | 0                     | 0                   | 1                        | 0                   | 0                      | 1                                 | 1                    | 0            | 3            |
| Domar et al., 1992                          | 0              | 0            | 1                         | 0                          | 0                     | 0                          | 0                     | 0                   | 1                        | 0                   | 0                      | 1                                 | 0                    | 1            | 3            |
| Galletly et al., 1996                       | 0              | 0            | 1                         | 0                          | 0                     | 0                          | 0                     | 0                   | 1                        | 0                   | 0                      | 1                                 | 0                    | 1            | 3            |
| McQueeney et al., 1997                      | 1              | 0            | 0                         | 1                          | 1                     | 0                          | 0                     | 1                   | 1                        | 1                   | 0                      | 1                                 | 0                    | 3            | 7            |
| Tuschen-Caffier et al., 1999                | 0              | 0            | 1                         | 0                          | 0                     | 0                          | 0                     | 1                   | 1                        | 0                   | 0                      | 1                                 | 0                    | 1            | 4            |
| Domar et al., 2000                          | 1              | 1            | 1                         | 1                          | 0                     | 0                          | 0                     | 1                   | 1                        | 1                   | 1                      | 1                                 | 1                    | 4            | 10           |
| Terzioglu, 2001                             | 1              | 0            | 1                         | 0                          | 0                     | 0                          | 0                     | 1                   | 1                        | 0                   | 0                      | 1                                 | 0                    | 2            | 5            |
| Hosaka et al., 2002                         | 1              | 0            | 1                         | 1                          | 0                     | 0                          | 0                     | 1                   | 1                        | 0                   | 0                      | 1                                 | 0                    | 3            | 6            |
| McNaughton-Casill et al., 2002 <sup>a</sup> | 1              | 0            | 1                         | 0                          | 0                     | 0                          | 0                     | 1                   | 1                        | 0                   | 0                      | 1                                 | 0                    | 2            | 5            |
| Emery et al., 2003                          | 1              | 0            | 1                         | 1                          | 0                     | 0                          | 0                     | 1                   | 1                        | 0                   | 0                      | 1                                 | 0                    | 3            | 6            |
| Lee et al., 2003                            | 1              | 0            | 0                         | 0                          | 0                     | 0                          | 0                     | 1                   | 1                        | 0                   | 0                      | 1                                 | 0                    | 1            | 4            |

1  
2  
3  
4  
5  
6  
7  
8  
9  
10  
11  
12  
13  
14  
15  
16  
17  
18  
19  
20  
21  
22  
23  
24  
25  
26  
27  
28  
29  
30  
31  
32  
33  
34  
35  
36  
37  
38  
39  
40  
41  
42  
43  
44  
45  
46  
47  
48  
49

|                                    |   |   |   |   |   |   |   |   |   |   |   |   |   |   |   |
|------------------------------------|---|---|---|---|---|---|---|---|---|---|---|---|---|---|---|
| De Klerk et al., 2005              | 1 | 0 | 1 | 1 | 0 | 0 | 0 | 1 | 1 | 0 | 0 | 1 | 0 | 3 | 6 |
| Schmidt et al., 2005               | 0 | 0 | 1 | 0 | 0 | 0 | 0 | 1 | 1 | 0 | 0 | 1 | 0 | 1 | 4 |
| Chan et al., 2006                  | 1 | 0 | 1 | 1 | 0 | 0 | 0 | 1 | 1 | 0 | 0 | 1 | 1 | 3 | 7 |
| Levitas et al., 2006               | 0 | 0 | 0 | 0 | 0 | 0 | 0 | 1 | 0 | 0 | 0 | 0 | 0 | 0 | 1 |
| Nilforooshan et al., 2006          | 1 | 0 | 1 | 0 | 0 | 0 | 0 | 1 | 1 | 0 | 0 | 1 | 1 | 2 | 6 |
| Tuil et al., 2007                  | 1 | 0 | 1 | 1 | 0 | 0 | 0 | 1 | 1 | 0 | 0 | 1 | 0 | 3 | 6 |
| Cousineau et al., 2008             | 1 | 0 | 1 | 1 | 1 | 0 | 0 | 1 | 1 | 1 | 0 | 1 | 0 | 4 | 8 |
| Faramarzi et al., 2008             | 1 | 0 | 1 | 0 | 0 | 0 | 0 | 1 | 1 | 0 | 0 | 1 | 1 | 2 | 6 |
| Lancastle and Boivin, 2008         | 1 | 0 | 1 | 1 | 1 | 0 | 0 | 1 | 1 | 1 | 0 | 1 | 0 | 4 | 8 |
| Noorbala et al., 2008 <sup>a</sup> | 1 | 0 | 0 | 1 | 1 | 0 | 0 | 1 | 1 | 0 | 0 | 1 | 0 | 3 | 6 |
| Mori, 2009                         | 1 | 0 | 1 | 1 | 1 | 0 | 0 | 1 | 1 | 1 | 0 | 1 | 0 | 4 | 8 |
| Panagopoulou et al., 2009          | 1 | 0 | 1 | 0 | 1 | 0 | 0 | 1 | 1 | 1 | 0 | 1 | 0 | 3 | 7 |
| Haemmerli et al., 2010             | 1 | 0 | 1 | 1 | 0 | 0 | 0 | 1 | 1 | 0 | 0 | 1 | 0 | 3 | 6 |
| Sexton et al., 2010                | 1 | 0 | 1 | 1 | 0 | 0 | 0 | 1 | 1 | 0 | 0 | 1 | 0 | 3 | 6 |
| Domar et al., 2011                 | 1 | 0 | 1 | 1 | 1 | 0 | 0 | 1 | 0 | 0 | 1 | 0 | 0 | 4 | 6 |
| Hughes and Mann de Silva, 2011     | 0 | 0 | 0 | 0 | 0 | 0 | 0 | 0 | 1 | 0 | 0 | 1 | 0 | 0 | 2 |
| Chan et al. 2012                   | 1 | 0 | 1 | 1 | 0 | 0 | 0 | 1 | 1 | 0 | 0 | 1 | 0 | 3 | 6 |
| Gorayeb et al., 2012               | 1 | 0 | 1 | 1 | 0 | 0 | 0 | 1 | 0 | 0 | 0 | 0 | 0 | 3 | 4 |
| Koszycki et al., 2012              | 1 | 0 | 1 | 1 | 0 | 0 | 0 | 1 | 1 | 1 | 0 | 1 | 0 | 3 | 7 |
| Matthiesen et al., 2012            | 1 | 0 | 1 | 1 | 1 | 0 | 0 | 1 | 1 | 1 | 0 | 1 | 0 | 4 | 8 |

1  
2  
3  
4  
5  
6  
7  
8  
9  
10  
11  
12  
13  
14  
15  
16  
17  
18  
19  
20  
21  
22  
23  
24  
25  
26  
27  
28  
29  
30  
31  
32  
33  
34  
35  
36  
37  
38  
39  
40  
41  
42  
43  
44  
45  
46  
47  
48  
49

|                                   |          |          |          |          |          |          |          |          |          |   |          |          |   |          |          |
|-----------------------------------|----------|----------|----------|----------|----------|----------|----------|----------|----------|---|----------|----------|---|----------|----------|
| Mosalanejad et al., 2012          | <b>1</b> | <b>0</b> | <b>0</b> | <b>0</b> | <b>0</b> | <b>0</b> | <b>0</b> | <b>1</b> | <b>1</b> | 0 | 0        | <b>1</b> | 0 | <b>1</b> | <b>4</b> |
| Mosalanejad et al., 2012b         | <b>0</b> | <b>0</b> | <b>1</b> | <b>0</b> | <b>0</b> | <b>0</b> | <b>0</b> | <b>1</b> | <b>1</b> | 0 | 0        | <b>1</b> | 0 | <b>1</b> | <b>4</b> |
| Catoire et al., 2013 <sup>a</sup> | <b>0</b> | 0        | <b>1</b> | 0 | <b>1</b> | <b>1</b> | 0 | <b>0</b> | <b>3</b> |
| Galhardo et al., 2013             | <b>0</b> | <b>0</b> | <b>1</b> | <b>0</b> | <b>0</b> | <b>0</b> | <b>0</b> | <b>1</b> | <b>1</b> | 0 | 0        | <b>1</b> | 0 | <b>1</b> | <b>4</b> |
| Vizeh et al., 2013                | <b>1</b> | <b>0</b> | <b>1</b> | <b>1</b> | <b>1</b> | <b>0</b> | <b>0</b> | <b>1</b> | <b>1</b> | 0 | <b>1</b> | <b>1</b> | 0 | <b>4</b> | <b>8</b> |

Criteria 1 – 7 in bold font are the original Jadad scores, a – f are the additional criteria. **1) Was the study described as randomized; 2) Was the study described as double blind; 3) Was there a description of withdrawals and dropouts; 4) The method of randomization was described, and appropriate; 5) The method of blinding was described, and appropriate; 6) The method of randomization was described, but in inappropriate; 7) The method of blinding was described, but inappropriate;** a) The study included a control group; b) The study included pre- and post-assessment; c) There was an attempt of blinding or masking the active condition to patients; d) There was an attempt of blinding the researchers e) The study used standardized and reliable outcome measures; f) The study reported pre-post correlation.

<sup>a</sup>) In these studies, the original Jadad score and the modified quality score relate to the methodological quality of the published study. For the purpose of the meta-analyses, some of the groups were collapsed or omitted, e.g. if they compared two or more interventions or compared a psychological intervention with a medical treatment, thereby changing design status as shown in Table 1.

1  
2 298 **Effects of psychosocial intervention**  
3

4  
5 299 The results of the meta-analyses are shown in [Table 3](#).  
6

7  
8 300 *Pregnancy rates*  
9

10 301 A statistically significant and robust effect size (RR = 2.01) was found for the 10 studies which had  
11  
12 302 investigated effects of psychosocial intervention on clinical pregnancy rates, with the chance of  
13  
14 303 becoming pregnant being doubled in the intervention group. Adjusting for possible publication bias,  
15  
16 304 the risk ratio was somewhat lower (1.57). **A forest plot of the effects of psychological intervention**  
17  
18 305 **on pregnancy outcomes are shown in Figure 2.**  
19

20  
21  
22 306 (Insert Figure 2 near here)  
23

24  
25 307 *Combined psychological outcomes*  
26

27 308 Combining the effect sizes of the 35 studies which had included one or more psychological out-  
28  
29 309 comes revealed a statistically significant, robust<sup>51</sup>, medium<sup>39</sup> effect size ( $g = 0.59$ ). The results indi-  
30  
31 310 cated possible publication bias (skewed funnel plot, Egger's test ( $p < 0.05$ )) in favor of larger pub-  
32  
33 311 lished ESs. When imputing missing ESs,<sup>52</sup> the resulting adjusted pooled ES was smaller (0.31), but  
34  
35 312 remained statistically significant. Taking gender into consideration, the ES (0.51) remained statisti-  
36  
37 313 cally significant for women, still suggesting a robust effect. The ES was smaller for men (0.34) and  
38  
39 314 did not reach statistical significance. **A forest plot of the effects of psychological intervention on the**  
40  
41 315 **combined psychological outcomes is shown in Figure 3.**  
42  
43  
44

45  
46 316 (Insert Figure 3 near here)  
47

48  
49 317 *Infertility-related distress*  
50

51 318 Only ten studies had included infertility-related distress as an outcome. Small ESs were found for  
52  
53 319 women and men combined (0.24) and women alone (0.37), and did not reach statistical signifi-  
54  
55 320 cance.  
56  
57  
58  
59  
60

**Table 3. Results of meta-analyses of effects of psychosocial intervention on psychological outcomes and pregnancy rates among infertile couples**

|                                            | Sample size       |      | Heterogeneity <sup>a</sup> |    |        |                | Global effect sizes   |              |        | Failsafe N <sup>c</sup> | Criterion <sup>d</sup> |
|--------------------------------------------|-------------------|------|----------------------------|----|--------|----------------|-----------------------|--------------|--------|-------------------------|------------------------|
|                                            | K                 | N    | Q                          | df | P      | I <sup>2</sup> | Hedges g <sup>b</sup> | 95 % CI      | p      |                         |                        |
| <b>MAIN EFFECTS</b>                        |                   |      |                            |    |        |                |                       |              |        |                         |                        |
| Pregnancy                                  |                   |      |                            |    |        |                |                       |              |        |                         |                        |
| Pregnancy, women                           | 10                | 1324 | 22.0                       | 9  | =0.009 | 59.0           | 2.01 (RR)             | 1.48 – 2.73  | <0.001 | 130                     | 60                     |
| <i>Adjusted for publication bias</i>       | (13)              | -    | -                          | -  | -      | -              | 1.57 (RR)             | 1.10 – 2.25  | <0.05  | -                       | -                      |
| Psych. combined, women+men                 | 35                | 2746 | 259.2                      | 34 | <0.001 | 86.9           | 0.59                  | 0.38 – 0.80  | <0.001 | 1552                    | 185                    |
| <i>Adjusted for publication bias</i>       | (42) <sup>e</sup> | -    | -                          | -  | -      | -              | 0.31                  | 0.07 – 0.56  | <0.05  | -                       | -                      |
| Psych. combined, women                     | 28                | 2076 | 130.8                      | 27 | <0.001 | 76.4           | 0.51                  | 0.32 – 0.70  | <0.001 | 798                     | 150                    |
| <i>Adjusted for publication bias</i>       | (34) <sup>e</sup> | -    | -                          | -  | -      | -              | 0.30                  | 0.09 – 0.51  | <0.05  | -                       | -                      |
| Psych. combined, men                       | 7                 | 347  | 8.9                        | 6  | =0.178 | 32.8           | 0.34                  | 0.08 – 0.59  | =0.010 | 12                      | 45                     |
| Between-group <sup>f</sup> (women vs. men) | 35                | 2110 | 1.2                        | 1  | Ns     | -              | -                     | -            | -      | -                       | -                      |
| Infertility distress                       |                   |      |                            |    |        |                |                       |              |        |                         |                        |
| Infertility distress, women+men            | 10                | 615  | 21.4                       | 9  | =0.01  | 58.0           | 0.24                  | -0.02 – 0.50 | ns     | -                       | -                      |
| Infertility distress, women                | 6                 | 371  | 17.8                       | 5  | =0.003 | 71.8           | 0.37                  | -0.06 – 0.79 | ns     | -                       | -                      |
| Depressive symptoms                        |                   |      |                            |    |        |                |                       |              |        |                         |                        |
| Depression symp., women+men                | 21                | 1558 | 367.5                      | 20 | <0.001 | 94.6           | 1.00                  | 0.54 – 1.45  | <0.001 | 1022                    | 115                    |
| <i>Adjusted for publication bias</i>       | (25) <sup>e</sup> | -    | -                          | -  | -      | -              | 0.31                  | -0.20 – 0.84 | ns     | -                       | -                      |
| Depressive symp., women                    | 17                | 992  | 107.7                      | 16 | <0.001 | 85.1           | 0.73                  | 0.41 – 1.06  | <0.001 | 393                     | 95                     |
| <i>Adjusted for publication bias</i>       | (23) <sup>e</sup> | -    | -                          | -  | -      | -              | 0.29                  | -0.07 – 0.65 | ns     | -                       | -                      |
| Depressive symp., men                      | 5                 | 243  | 1.9                        | 4  | =0.749 | 0.00           | 0.13                  | -0.11 – 0.37 | ns     | -                       | -                      |

|                                            |                   |      |       |    |        |      |      |              |        |     |     |
|--------------------------------------------|-------------------|------|-------|----|--------|------|------|--------------|--------|-----|-----|
| Between-group <sup>f</sup> (women vs. men) | 22                | 1235 | 8.5   | 1  | <0.004 | -    | -    | -            | -      | -   | -   |
| <b>Anxiety</b>                             |                   |      |       |    |        |      |      |              |        |     |     |
| Anxiety, women+men                         | 25                | 2159 | 144.4 | 24 | <0.001 | 83.4 | 0.51 | 0.31 – 0.71  | <0.001 | 760 | 135 |
| <i>Adjusted for publication bias</i>       | (29) <sup>e</sup> | -    | -     | -  | -      | -    | 0.31 | 0.07 – 0.54  | <0.05  | -   | -   |
| Anxiety, women                             | 23                | 1737 | 114.3 | 22 | <0.001 | 80.8 | 0.53 | 0.32 – 0.73  | <0.001 | 631 | 125 |
| <i>Adjusted for publication bias</i>       | (27) <sup>e</sup> | -    | -     | -  | -      | -    | 0.32 | 0.08 – 0.57  | <0.05  | -   | -   |
| Anxiety, men                               | 5                 | 246  | 8.7   | 4  | =0.070 | 53.8 | 0.32 | -0.04 – 0.67 | ns     | -   | -   |
| Between-group <sup>f</sup> (women vs. men) | 28                | 1983 | 1.0   | 1  | Ns     | -    | -    | -            | -      | -   | -   |
| <b>Marital function</b>                    |                   |      |       |    |        |      |      |              |        |     |     |
| Marital function, women+men                | 5                 | 633  | 14.6  | 4  | =0.006 | 72.6 | 0.09 | -0.23 – 0.41 | ns     | -   | -   |
| Marital function, women                    | 4                 | 587  | 14.5  | 3  | =0.002 | 79.3 | 0.08 | -0.30 – 0.46 | ns     | -   | -   |

**MODERATOR ANALYSES**

**Pregnancy (women)**

**Study design<sup>h</sup>**

|                                      |                  |      |      |   |        |      |           |             |         |    |    |
|--------------------------------------|------------------|------|------|---|--------|------|-----------|-------------|---------|----|----|
| RCT                                  | 6                | 856  | 10.8 | 5 | =0.057 | 53.5 | 1.67 (RR) | 1.17 – 2.40 | < 0.05  | 22 | 40 |
| NRCT                                 | 4                | 468  | 7.9  | 3 | =0.048 | 62.1 | 2.80 (RR) | 1.55 – 5.06 | < 0.001 | 31 | 30 |
| <i>Adjusted for publication bias</i> | (6) <sup>e</sup> | -    | -    | - | -      | -    | 1.93 (RR) | 1.07 – 3.49 | < 0.05  | -  | -  |
| Between group <sup>f</sup>           | 10               | 1324 | 2.1  | 1 | Ns     | -    | -         | -           | -       | -  | -  |

**Intervention format**

|                            |   |      |      |   |        |      |           |             |         |    |    |
|----------------------------|---|------|------|---|--------|------|-----------|-------------|---------|----|----|
| Group                      | 5 | 691  | 10.9 | 4 | =0.027 | 63.4 | 2.03 (RR) | 1.29 – 3.20 | < 0.01  | 28 | 35 |
| Individual                 | 4 | 433  | 2.2  | 3 | =0.531 | 0.0  | 1.65 (RR) | 1.26 – 2.17 | < 0.001 | 8  | 30 |
| Between group <sup>f</sup> | 9 | 1124 | 0.5  | 1 | Ns     | -    | -         | -           | -       | -  | -  |

**Psychological outcomes combined (women+men)**

**Study design<sup>h</sup>**

|                                      |                   |      |       |    |        |      |      |              |        |     |     |
|--------------------------------------|-------------------|------|-------|----|--------|------|------|--------------|--------|-----|-----|
| RCT                                  | 20                | 2185 | 232.4 | 19 | <0.001 | 91.8 | 0.70 | 0.36 – 1.03  | <0.001 | 642 | 110 |
| <i>Adjusted for publication bias</i> | (24) <sup>e</sup> | -    | -     | -  | -      | -    | 0.26 | -0.10 – 0.68 | ns     | -   | -   |
| NRCT                                 | 8                 | 450  | 14.9  | 7  | =0.037 | 53.1 | 0.28 | -0.00 – 0.57 | ns     | -   | -   |

1  
2  
3  
4  
5  
6  
7  
8  
9  
10  
11  
12  
13  
14  
15  
16  
17  
18  
19  
20  
21  
22  
23  
24  
25  
26  
27  
28

|                                      |                         |      |     |   |        |     |             |                    |                 |    |    |
|--------------------------------------|-------------------------|------|-----|---|--------|-----|-------------|--------------------|-----------------|----|----|
| UCT                                  | 7                       | 215  | 6.0 | 6 | =0.424 | 0.0 | 0.55        | 0.40 – 0.70        | <0.001          | 90 | 45 |
| <i>Adjusted for publication bias</i> | <i>(10)<sup>e</sup></i> | -    | -   | - | -      | -   | <i>0.51</i> | <i>0.36 – 0.66</i> | <i>&lt;0.05</i> | -  | -  |
| Between group <sup>f</sup>           | 35                      | 2850 | 3.9 | 2 | Ns     | -   | -           | -                  | -               | -  | -  |

**Intervention types**

|                                      |                         |             |              |          |                  |             |             |                     |                  |            |            |
|--------------------------------------|-------------------------|-------------|--------------|----------|------------------|-------------|-------------|---------------------|------------------|------------|------------|
| <b>CBT</b>                           | <b>7</b>                | <b>475</b>  | <b>39.0</b>  | <b>6</b> | <b>&lt;0.001</b> | <b>84.6</b> | <b>0.84</b> | <b>0.33 – 1.35</b>  | <b>=0.001</b>    | <b>107</b> | <b>45</b>  |
| <i>Adjusted for publication bias</i> | <i>(10)<sup>e</sup></i> | -           | -            | -        | -                | -           | <i>0.37</i> | <i>-0.19 – 0.93</i> | <i>ns</i>        | -          | -          |
| <b>MBI</b>                           | <b>9</b>                | <b>841</b>  | <b>57.7</b>  | <b>8</b> | <b>&lt;0.001</b> | <b>86.1</b> | <b>0.61</b> | <b>0.17 – 0.65</b>  | <b>&lt;0.001</b> | <b>158</b> | <b>55</b>  |
| <i>Adjusted for publication bias</i> | <i>(10)<sup>e</sup></i> | -           | -            | -        | -                | -           | <i>0.42</i> | <i>0.01 – 0.84</i>  | <i>&lt;0.05</i>  | -          | -          |
| <b>Other</b>                         | <b>19</b>               | <b>1430</b> | <b>149.2</b> | <b>9</b> | <b>&lt;0.001</b> | <b>87.9</b> | <b>0.50</b> | <b>0.18 – 0.81</b>  | <b>=0.002</b>    | <b>246</b> | <b>105</b> |
| <i>Adjusted for publication bias</i> | <i>(24)<sup>e</sup></i> | -           | -            | -        | -                | -           | <i>0.17</i> | <i>-0.20 – 0.54</i> | <i>ns</i>        | -          | -          |
| Between group <sup>f</sup>           | 35                      | 2746        | 1.3          | 2        | Ns               | -           | -           | -                   | -                | -          | -          |

**Intervention format**

|                                      |                         |      |      |    |        |      |             |                    |                 |     |     |
|--------------------------------------|-------------------------|------|------|----|--------|------|-------------|--------------------|-----------------|-----|-----|
| Group                                | 20                      | 1484 | 87.2 | 19 | <0.001 | 78.2 | 0.76        | 0.55 – 0.98        | <0.001          | 959 | 110 |
| <i>Adjusted for publication bias</i> | <i>(26)<sup>e</sup></i> | -    | -    | -  | -      | -    | <i>0.50</i> | <i>0.25 – 0.75</i> | <i>&lt;0.05</i> | -   | -   |
| Individual                           | 9                       | 834  | 17.7 | 8  | =0.023 | 54.9 | 0.13        | -0.08 – 0.35       | ns              | -   | -   |
| Couples                              | 3                       | 284  | 92.3 | 2  | <0.001 | 97.8 | 1.07        | -1.02 – 3.16       | ns              | -   | -   |
| Online                               | 3                       | 248  | 1.2  | 2  | =0.541 | 0.00 | 0.03        | -0.22 – 0.28       | ns              | -   | --  |
| Between group <sup>f</sup>           | 35                      | 2850 | 24.5 | 3  | <0.001 | -    | -           | -                  | -               | -   | -   |

<sup>a)</sup> Q-statistic: *p*-values < 0.1 taken to suggest heterogeneity. I<sup>2</sup> statistic: 0% (no heterogeneity), 25% (low heterogeneity), 50% (moderate heterogeneity), 75% (high heterogeneity).

<sup>b)</sup> ESR = Hedges *g*. Standardized mean difference, adjusting for small sample bias. A positive value indicates an effect size in the hypothesized direction, i.e. reduced pain or relative smaller increased in pain in the intervention group. All ES's were combined using a random effects model. To ensure independency, if a study reported results for more than one pain measure, the ES's were combined (mean), ensuring that only one ES per study was used in the calculation.

<sup>c)</sup> Failsafe N = number of non-significant studies that would bring the *p*-value to non-significant (*p* > 0.05)

<sup>d)</sup> A Failsafe N exceeding the criterion (5 × *k* + 10) indicates a robust result <sup>98</sup>.

<sup>e)</sup> If analyses indicated the possibility of publication bias, missing studies were imputed and an adjusted ESR calculated (italics), (K) indicates number of published studies + number of imputed studies.

<sup>f)</sup> Meta-ANOVA (between-study comparisons)

<sup>h)</sup> RCT (randomized controlled trial), NRCT (Non-randomized Controlled Trial), UCT (uncontrolled trial (pre-post))

29323  
30324  
31325  
32326  
33327  
34328  
35329  
36330  
37331  
38  
39333  
40  
41  
42  
43  
44  
45  
46  
47  
48  
49

1  
2 334 *Depression*

3  
4 335 Twenty-one studies had assessed depressive symptoms. A statistically significant ES (1.00) was  
5  
6 336 found for women and men combined. However, when adjusting for possible publication bias, the  
7  
8 337 results changed dramatically to a small, non-significant ES of 0.31. Similar results were found for  
9  
10 338 women alone with a statistically significant ES of 0.73 reduced to a non-significant 0.29 after ad-  
11  
12 339 justing for possible publication bias. For men alone, the ES (0.13) did not reach statistically signifi-  
13  
14 340 cance.

15  
16  
17  
18 341 *State anxiety*

19  
20 342 Twenty-five studies had included state anxiety as outcome. A statistically significant, robust medi-  
21  
22 343 um ES (0.51) was found for women and men combined. Adjusting for possible publication bias led  
23  
24 344 to a smaller, but statistically significant, ES (0.31). For women, the ES of 0.53 was statistically sig-  
25  
26 345 nificant, but smaller (0.32) and non-significant when adjusting for publication bias. For men only,  
27  
28 346 the analysis produced a small, non-significant ES of 0.32.

29  
30  
31  
32 347 *Marital function*

33  
34 348 Only 5 studies (N = 633) had included measures of marital function, and only very small (ES: 0.09-  
35  
36 349 0.08) non-significant effects were found.

37  
38  
39 350 **Possible moderators**

40  
41 351 As the  $Q$ -statistics were generally statistically significant ( $p < 0.10$ ) and the  $I^2$ -statistic indicated low  
42  
43 352 to medium heterogeneity, we, when a sufficient number of studies were available for each analysis,  
44  
45 353 explored possible sources of heterogeneity and analyzed whether the ESs for pregnancy and com-  
46  
47 354 bined psychological outcomes varied according to between-study differences in study design and  
48  
49 355 intervention characteristics (type and format). The results are shown in [Table 3](#).

50  
51  
52  
53 356 *Study design*

54  
55 357 The ESs found for pregnancy outcomes were statistically significant for both randomized controlled  
56  
57 358 trials (RCT) (RR=1.7) and non-randomized controlled studies (NRCT) (2.8), with the ES for NRCT



1  
2 359 being considerably smaller (1.9) when adjusting for publication bias. The difference did not reach  
3  
4 360 statistical significance. For psychological outcomes, statistically significant results were found for  
5  
6 361 both RCTs ( $g= 0.70$ ) and UCTs (0.55), but not for NRCTs (0.28). When adjusting for publication  
7  
8 362 bias, the ES for RCTs was considerably reduced (0.26). Furthermore, between-group differences  
9  
10 363 did not reach statistical significance.

#### 13 364 *Intervention type*

15 365 The number of studies for each intervention type was insufficient to explore differences in pregnan-  
16  
17 366 cy outcomes. For the combined psychological outcomes, statistically significant, and – as indicated  
18  
19 367 by the large failsafe numbers – robust effects, were found for all three intervention categories with  
20  
21 368 the largest ES found for CBT ( $g=0.84$ ), followed by MBI (0.61) and other intervention types (0.50).  
22  
23 369 The between-group differences, however, did not reach statistical significance. Furthermore, the  
24  
25 370 results suggested the possibility of publication bias, and when adjusting for publication bias, all  
26  
27 371 three ESs were reduced from medium to small.

#### 30 372 *Intervention format*

32 373 For pregnancy outcomes, the number of studies was sufficient for Group and Individual formats.  
33  
34 374 Both formats yielded statistical significant ES's (RR: 2.03 and 1.65), but the between-group differ-  
35  
36 375 ence did not reach statistical significance. For the combined psychological outcomes, a statistically  
37  
38 376 significant effect was found for Group format ( $g= 0.76$ ) ( $p < 0.001$ ). The ESs for intervention for-  
39  
40 377 mats such as Individual, Couples, and Online did not reach statistical significance. The overall be-  
41  
42 378 tween-group difference for intervention formats was statistical significant ( $p < 0.001$ ).

#### 45 379 *Other study characteristics*

47 380 The possible moderating influence of the continuously assessed study characteristics of mean age,  
48  
49 381 intervention duration, number or sessions, and study quality (modified quality scores) were ana-  
50  
51 382 lyzed with meta-regression. As seen in [Table 4](#), no significant effects were found for any of the  
52  
53 383 moderators for either pregnancy or the combined psychological outcomes. A total of 6 studies had  
54  
55  
56  
57  
58  
59  
60

384 examined effects on both pregnancy and anxiety. When examining the possible role of anxiety re-  
 385 duction as a mediator of the effect on pregnancy outcome with meta-regression, a statistically sig-  
 386 nificant association was found between the ESs for anxiety and pregnancy, indicating that the great-  
 387 er the reduction in anxiety, the greater the likelihood of achieving pregnancy (see [Table 4](#)).

388 **Table 4. Results of meta-regression analyses**

| Dependent variable | Independent variable                          | K  | Beta <sup>a</sup> | 95% CI        | p            |
|--------------------|-----------------------------------------------|----|-------------------|---------------|--------------|
| Pregnancy          | ES- Anxiety                                   | 6  | 0.19              | 0.06 – 0.31   | <b>0.004</b> |
|                    | Mean age                                      | 9  | -0.05             | -0.19 – 0.10  | 0.534        |
|                    | Intervention duration                         | 9  | 0.01              | -0.03 – 0.06  | 0.669        |
|                    | Number of sessions                            | 9  | -0.00             | -0.08 – 1.07  | 0.922        |
|                    | Study quality (Quality scores) <sup>b</sup>   | 10 | -0.02             | -0.09 – 0.04  | 0.477        |
| Psych. Combined    | Mean age                                      | 32 | -0.05             | -0.12 – -0.02 | 0.214        |
|                    | Intervention duration                         | 32 | 0.01              | -0.02 – 0.04  | 0.518        |
|                    | Number of sessions                            | 27 | 0.03              | -0.01 – 0.07  | 0.150        |
|                    | Study quality (Quality scores) <sup>b,c</sup> | 35 | -0.02             | -0.06 – 0.02  | 0.415        |

389 <sup>a)</sup> Mixed effects regression: unrestricted maximum likelihood; <sup>b)</sup> Modified Jadad quality score; <sup>c)</sup> P-values for individual  
 390 psychological outcomes; 0.09 (anxiety) – 0.58 (depression).

## 391 Discussion

### 392 Primary findings

393 Our meta-analysis of the available evidence suggests that women who receive some form of psy-  
 394 chological intervention are approximately twice as likely to become pregnant when compared to  
 395 controls receiving standardized care or active control intervention. Although the results of the 10  
 396 currently available studies taken together appeared robust, there were some indications of publica-  
 397 tion bias in favor of studies with larger positive effect sizes. It should also be noted that the preci-  
 398 sion of the effect size estimate is limited, with possible RR's ranging from approx. 1.5 to 2.7. **Fur-**  
 399 **thermore, although the between-group difference did not reach statistical significance, when disre-**  
 400 **garding the possibility of publication bias, NRCT's yielded greater effects (RR: 2.8 (95 % CI: 1.55**  
 401 **– 5.06)) than RCT's (RR: 1.7 (95 % CI: 1.17 – 2.40)).** Compared with other types of interventions  
 402 that historically have been introduced to improve pregnancy rates in ART (improved culture media,

1  
2 403 new hormone stimulation regimens etc.), even an effect corresponding to the lower limit of the con-  
3  
4 404 fidence interval is substantial. While the results could be considered surprising, the available data  
5  
6 405 do provide any clear-cut reasons to reject this finding, which is further supported by the results of  
7  
8 406 the meta-regression showing that larger reductions in anxiety were associated with improved preg-  
9  
10 407 nancy outcomes. With respect to the psychological outcomes currently reported in the literature, the  
11  
12 408 results suggest that psychological intervention could be effective in reducing anxiety (25 studies) as  
13  
14 409 well as depressive symptoms (21 studies) with the effects corresponding to medium and large effect  
15  
16 410 sizes (0.5 and 1.0). As seen for pregnancy outcomes, there were indications of publication bias in  
17  
18 411 the direction of larger positive effects, and adjusting for publication bias resulted in a considerably  
19  
20 412 smaller, statistically non-significant, effect size for depressive symptoms. The pooled results did not  
21  
22 413 reach statistical significance for the 10 studies which had investigated effects on infertility-related  
23  
24 414 distress and the 5 studies which had included measures of marital function.

#### 28 29 415 **Comparing with results of previous reviews**

30  
31 416 The present review included 39 studies of a total of 3401 women (3064) and men (347). The partic-  
32  
33 417 ipants received various psychosocial interventions lasting from one week to six months, including  
34  
35 418 cognitive behavioral therapy, emotional disclosure, psycho-education, and mind/body interventions.  
36  
37 419 The present review evaluates almost twice the number of studies included in the most recent previ-  
38  
39 420 ous review,<sup>31</sup> which reported mixed results of the efficacy of psychosocial intervention. Whereas  
40  
41 421 the former review found no evidence for attenuating distress, there was promising support of psy-  
42  
43 422 chological intervention increasing pregnancy chances for women not receiving ART.<sup>31</sup> In line with  
44  
45 423 the second review from 2005,<sup>30</sup> we found more credible results for group intervention than for other  
46  
47 424 formats, e.g. online interventions, individual, and couples intervention.<sup>30</sup> The first review published  
48  
49 425 in 2003 also highlighted group interventions as more effective, especially if the interventions em-  
50  
51 426 phasized education and skills training, such as relaxation. Our results concurred with these earlier  
52  
53 427 observations, suggesting that interventions delivered in groups may be more effective in reducing  
54  
55 428 distress. **Moreover, although the comparison did not reach statistical significance; prior to adjusting**

1  
2 429 for publication bias, the intervention type of CBT appeared to be more effective than MBI and other  
3  
4 430 types of interventions. Here, it should be noted that the categorization of interventions may be  
5  
6 431 somewhat ambiguous. For example, the study by Cousineau et al. (2000)<sup>83</sup> could have been catego-  
7  
8 432 rized as a mind-body intervention, as the authors had provided a website that directed attention to-  
9  
10 433 wards relaxation exercises. However, as there was no reporting of whether the participants were  
11  
12 434 engaged in weekly or daily training, we chose to interpret relaxation as an optional feature, and  
13  
14 435 hence the study was not categorized as MBI. The possible ambiguity and considerable variability in  
15  
16 436 interventions forced us to categorize many studies as “other”, which limits our understanding the  
17  
18 437 possible mechanisms in psychosocial interventions. Taken together, the available data do not pro-  
19  
20 438 vide a clear basis for understanding possible differences between effects of different intervention  
21  
22 439 types, and the results should be interpreted with caution. The more recently conducted studies in-  
23  
24 440 cluded in the present review have contributed by increasing the size of the available dataset consid-  
25  
26 441 erably, and taken together, the currently available evidence suggests that offering psychosocial in-  
27  
28 442 terventions may improve both chances of pregnancy and quality-of-life for infertile patients going  
29  
30 443 through fertility treatment.  
31  
32  
33  
34  
35

#### 36 444 **Strengths and limitations**

37  
38 445 Our systematic review and meta-analysis has several strengths. We conducted a comprehensive  
39  
40 446 search and performed the review in accordance with the recommended guidelines.<sup>34</sup> In order to lim-  
41  
42 447 it the possibility of selection bias, we encouraged authors of eligible studies to elaborate on their  
43  
44 448 results if the data reported was insufficient, and asked authors of papers written in foreign language  
45  
46 449 to submit their results to us in English. The included studies represented a range of different coun-  
47  
48 450 tries, has used comparable outcome measures, and provided fairly comprehensive descriptions of  
49  
50 451 the interventions studied. In addition, we conducted a detailed evaluation of the methodological  
51  
52 452 quality in order to detect any issues that could possible affect the accuracy of the effect sized calcu-  
53  
54 453 lated. While not all characteristics, in particular reproductive, could be assessed; most general  
55  
56  
57  
58  
59  
60

1 454 **methodological aspects were covered.** We also explored heterogeneity and made adjustments for  
2  
3  
4 455 possible publication bias, when required.

5  
6  
7 456 Some limitations of the currently available data should also be noted. First, the samples investigated  
8  
9 457 may not have been as homogeneous as could be wished for. **A small number of infertile participants**  
10  
11 458 **did not receive treatment with ART, and, furthermore, it was not consistently reported what type of**  
12  
13 459 **ART procedure the participants received, what phase or treatment they were in, or the causes of**  
14  
15 460 **infertility. This information is clearly important when interpreting the outcomes, and unknown be-**  
16  
17 461 **tween-study and within-study between-group differences, e.g. in numbers of cycles, idiopathic in-**  
18  
19 462 **fertility and embryo transfer, may have influenced the results, in particular for pregnancy outcomes.**  
20  
21 463 **However, such differences are likely to be less important in RCT's, where randomization is ex-**  
22  
23 464 **pected to reduce their influence. Although the difference did not reach statistical significance, RCTs**  
24  
25 465 **reported smaller ESs for pregnancy outcomes than NRCTs, which could be interpreted as support-**  
26  
27 466 **ing the concern that infertility and treatment characteristics may have been unevenly distributed**  
28  
29 467 **between psychological treatment arms, thus increasing the risk for misattribution of outcomes to**  
30  
31 468 **intervention, at least for NRCTs. On the other hand, we found no statistical significant associations**  
32  
33 469 **between study quality scores and either pregnancy or psychological outcomes, no statistically sig-**  
34  
35 470 **nificant differences in dropout rates between intervention and control groups, and, as suggested by**  
36  
37 471 **the large failsafe numbers, improvements generally appeared quite robust. A second possible limita-**  
38  
39 472 **tion is the high level of heterogeneity indicated by Q and I<sup>2</sup> statistics, and the pooled effect sizes**  
40  
41 473 **reported in the present review should thus be viewed as an estimate of the average expected effect**  
42  
43 474 **across a wide range of different settings. A third issue is that the considerable dropout rates and lack**  
44  
45 475 **of intention-to-treat analyses may have influenced the results, and it cannot be excluded that fertili-**  
46  
47 476 **ty- and treatment-related factors such as non-optimal fertilization, small number of eggs, etc. may**  
48  
49 477 **have demotivated some participants and made them drop out of the study, while individuals who**  
50  
51 478 **progressed through the treatment phases with more satisfactory outcomes were more likely to com-**  
52  
53 479 **plete the study.** Fourth, the indications of publication bias found for several results suggest the pos-  
54  
55  
56  
57  
58  
59  
60

1  
2 480 sibility of a “file drawer problem”, i.e. the existence of relevant unpublished null-findings, a com-  
3  
4 481 mon problem when conducting systematic reviews. Finally, due to inconsistencies in the reporting  
5  
6 482 of causes of infertility, we are unable to evaluate the possible associations between effect sizes and  
7  
8 483 causes of infertility. Although meta-analysis remains the gold standard when evaluating the current  
9  
10 484 evidence within a field of research, as is often the case with systematic reviews, qualitative as well  
11  
12 485 as quantitative, the overall level of the evidence reported in our review may be challenged by publi-  
13  
14 486 cation bias and the heterogeneity and methodological limitations of the available published studies.

### 17 18 487 **Clinical and practical implications**

19  
20 488 We found evidence for improvement in general psychological symptoms such as anxiety and de-  
21  
22 489 pression, but not for infertility-specific distress. A possible explanation for the latter could be the  
23  
24 490 lack of sensitivity of the infertility-related distress measures used. The questions used in these  
25  
26 491 measures are directly concerned with thoughts and feelings about involuntarily childlessness, and  
27  
28 492 rumination about the involuntary childlessness may persist, even when psychosocial intervention  
29  
30 493 improves general psychological wellbeing. Of particular interest is the result of our meta-regression  
31  
32 494 analysis of the six studies which had included both pregnancy and anxiety as outcomes showing  
33  
34 495 that larger reductions in anxiety were associated with greater chances of pregnancy. Anxiety is a  
35  
36 496 state of arousal, which over time is physically and mentally stressful for the individual.<sup>17</sup> Reducing  
37  
38 497 distress, anxiety in particular, may increase the physiological ability to cope with stress and advance  
39  
40 498 the possibility of impregnation. We found no association between mean age and pregnancy rates  
41  
42 499 outcomes, which may seem surprising, since age is the most important predictor of pregnancy out-  
43  
44 500 comes of ART.<sup>99,100</sup> However, our meta-regression was conducted for the mean age of the *samples*  
45  
46 501 and the mean age across study samples showed little variation (Mean age: 32.7; SD: 2.4). The rather  
47  
48 502 narrow age interval across study samples may explain an apparent lack of association between age  
49  
50 503 and chance of pregnancy. Our findings also suggest that group interventions appear to be more effi-  
51  
52 504 cacious than individual, couples, or online interventions. There could be various reasons for this.  
53  
54 505 Firstly, group interventions had longer duration (mean: 9.5 weeks) and involved more sessions (8.3)

1  
2 506 than individual interventions (mean: 5.3 and 4.4) and secondly, there is evidence of a positive im-  
3  
4 507 pact of “group settings” i.e. the sense-of-community between participants, reducing the feelings of  
5  
6 508 isolation or alienation and sharing with individuals in the same life situation etc.<sup>101-104</sup>  
7  
8

### 9 509 **Recommendations for future research**

10  
11 510 Despite the overall positive effects of psychosocial interventions found in the literature, our results  
12  
13 511 suggest a need for further studies with more rigorous methodology, including more strict reporting  
14  
15 512 of causes of infertility, the types of ART used, and which phases of treatment participants are in.  
16  
17 513 Also, most of the studies were conducted in high-income countries, it is therefore important to note  
18  
19 514 that the assertions made here cannot be generalized to low-income and developing countries. There  
20  
21 515 is thus a need for research in low-income or developing countries as well. Another aspect pertaining  
22  
23 516 to generalizability is the challenge of comparing volunteering infertile participants in psychosocial  
24  
25 517 efficacy studies with the general population of infertile individuals. The response rates in this area  
26  
27 518 are moderate, and it seems important in future studies to explore and compare characteristics of not  
28  
29 519 only dropouts and completers, but also of non-responders and responders. Furthermore, it would be  
30  
31 520 of importance to develop clinically meaningful categories of distress with the purpose of improving  
32  
33 521 interventions targeted to the various types and levels of distress experienced by the participants.  
34  
35 522 Psychological well-being/distress fluctuates over time during fertility treatment and a stepped care  
36  
37 523 approach could be potentially valuable in this population.<sup>105</sup> It is also possible that interventions  
38  
39 524 aimed at relieving distress conducted at different phases in treatment may obtain different psycho-  
40  
41 525 logical outcome results. This calls for improved reporting and comparability of the timing of the  
42  
43 526 psychosocial interventions and greater precision and comparability of the timing of outcome as-  
44  
45 527 sessments. Also needed are studies testing specific hypotheses concerning possible moderating and  
46  
47 528 mediating mechanisms of the effects of interventions on distress and pregnancy outcomes. For ex-  
48  
49 529 ample, which psychosocial factors do we need to target to optimize effects on distress and pregnan-  
50  
51 530 cy rates, and which biomarkers affected by psychosocial interventions, e.g. oxidative stress, in-  
52  
53 531 flammatory processes, can best explain the observed effects. This could assist in developing a more  
54  
55  
56  
57  
58  
59  
60

1  
2 532 solid evidence base providing better guidance for patients, health professionals, and policy makers  
3  
4 533 about “what works for whom” in infertile patients.  
5  
6  
7

## 8 534 **Conclusions**

9  
10 535 In conclusion, the present meta-analysis of 39 studies suggests that psychosocial intervention, in  
11  
12 536 particular CBT and MBI interventions, are beneficial for reducing distress in the form of anxiety  
13  
14 537 and depressive symptoms and for improving pregnancy outcomes of ART. Moreover, there is some  
15  
16 538 preliminary evidence to suggest that reduction in anxiety achieved through psychological interven-  
17  
18 539 tion may improve the chance of pregnancy. Despite the robust overall effect found, the considerable  
19  
20 540 heterogeneity of the available studies with respect to methodological quality, intervention type and  
21  
22 541 format still warrants caution as to the conclusions which can be drawn.  
23  
24  
25  
26  
27

## 28 542 **Acknowledgements**

29  
30 543 We would like to thank Gina Bay, Librarian at the Institute Library, Institute of Psychology and  
31  
32 544 Behavioral Sciences, School of Business and Social Sciences, Aarhus University for valuable and  
33  
34 545 tireless assistance throughout the database search process. We would also like to give our most  
35  
36 546 grateful thanks to the researchers who provided us with additional data on their studies or aided us  
37  
38 547 in other ways.  
39  
40  
41

42 548 Contributors: RZ and YF designed the protocol. YF developed search strategies and IFV, NGS and  
43  
44 549 YF performed the searches and study selection. YF and IFV undertook data extraction and quality  
45  
46 550 assessments. RZ was responsible for analyzing the data. YF drafted the manuscript and IFV, NGS,  
47  
48 551 HJI and RZ contributed to the manuscript throughout the process. All authors provided input and  
49  
50 552 were involved with the interpretation of this review. YF is the study guarantor.  
51  
52

53  
54 553 Funding: This specific study has not received funding, but Y.F. was supported by a research grant  
55  
56 554 from The Danish Agency for Science Technology and Innovation.  
57  
58  
59  
60



1 555 Competing interests: None declared

2  
3  
4 556 Ethical approval: None required

5  
6  
7 557 Data sharing: No additional data available

8  
9  
10  
11 558 **What is already known on this topic**

12  
13  
14 559 Previous reviews have been inconclusive concerning the efficacy of psychosocial interventions for  
15  
16 560 reducing distress and improving clinical pregnancy chances.

17  
18  
19 561 **What this study adds**

20  
21  
22 562 Synthesizing the currently available evidence suggests that psychosocial interventions could pro-  
23  
24 563 vide clinically meaningful benefits for infertile women and men. Psychosocial intervention leads to  
25  
26 564 reductions in anxiety and depressive symptoms, and larger reductions in anxiety appear to be asso-  
27  
28 565 ciated with increased fertility rates for women in treatment for infertility.

29  
30  
31  
32 566 Figure 1. PRISMA flowchart of selection of studies

33  
34  
35 567 Figure 2. Effects of psychosocial intervention on pregnancy rates

36  
37  
38 568 Figure 3. Effects of psychosocial intervention on combined psychological outcomes

39  
40  
41  
42 569 **References**

43  
44  
45 570 1. Hart VA. Infertility and the role of psychotherapy. *Issues Ment Health Nurs.* 2002;23(1):31-41.

46  
47  
48  
49 571 2. Oddens BJ, den Tonkelaar I, Nieuwenhuyse H. Psychosocial experiences in women facing fertili-  
50  
51 572 ty problems--a comparative survey. *Hum Reprod.* 1999;14(1):255-261.

52  
53  
54  
55 573 3. Cwikel J, Gidron Y, Sheiner E. Psychological interactions with infertility among women. *Eur J*  
56  
57 574 *Obstet Gynecol Reprod Biol.* 2004;117(2):126-131.

- 1  
2 575 4. Swan SH, Elkin EP, Fenster L. The question of declining sperm density revisited: An analysis of  
3  
4 576 101 studies published 1934-1996. *Environ Health Perspect.* 2000;108(10):961-966.  
5  
6  
7 577 5. Skakkebaek NE, Jorgensen N, Main KM, et al. Is human fecundity declining? *Int J Androl.*  
8  
9 578 2006;29(1):2-11.  
10  
11  
12 579 6. Hammen C. Stress and depression. *Annu Rev Clin Psychol.* 2005;1:293-319.  
13  
14  
15  
16 580 7. Benyamini Y, Gozlan M, Kokia E. Variability in the difficulties experienced by women undergo-  
17  
18 581 ing infertility treatments. *Fertil Steril.* 2005;83(2):275-283.  
19  
20  
21  
22 582 8. Alesi R. Infertility and its treatment--an emotional roller coaster. *Aust Fam Physician.*  
23  
24 583 2005;34(3):135-138.  
25  
26  
27 584 9. Merari D, Chetrit A, Modan B. Emotional reactions and attitudes prior to in vitro fertilization: An  
28  
29 585 inter-spouse study. *Psychol Health.* 2002;17(5):629-640.  
30  
31  
32  
33 586 10. Klonoff-Cohen H, Chu E, Natarajan L, Sieber W. A prospective study of stress among women  
34  
35 587 undergoing in vitro fertilization or gamete intrafallopian transfer. *Fertil Steril.* 2001;76(4):675-687.  
36  
37  
38 588 11. Edelman RJ, Connolly KJ, Bartlett H. Coping strategies and psychological adjustment of cou-  
39  
40 589 ples presenting for IVF. *J Psychosom Res.* 1994;38(4):355-364.  
41  
42  
43  
44 590 12. Eugster A, Vingerhoets AJ. Psychological aspects of in vitro fertilization: A review. *Soc Sci*  
45  
46 591 *Med.* 1999;48(5):575-589.  
47  
48  
49 592 13. Stanton AL, Dunkel-Schetter C, eds. *Psychological adjustment to infertility: An overview of*  
50  
51 593 *conceptual approaches.* Stanton, Annette L.; Dunkel-Schetter, Christine . Infertility: Perspectives  
52  
53 594 from stress and coping research. The Plenum series on stress and coping. (pp. 3-16). New York,  
54  
55 595 NY, US: Plenum Press; 1991 Infertility: Perspectives from stress and coping research.  
56  
57  
58  
59  
60

- 1  
2 596 14. Benyamini Y, Gozlan M, Kokia E. Women's and men's perceptions of infertility and their asso-  
3  
4 597 ciations with psychological adjustment: A dyadic approach. *British Journal of Health Psychology*.  
5  
6 598 2009;14:1-16. doi: 10.1348/135910708X279288.  
7  
8  
9 599 15. du Plessis S,S., Makker K, Desai NR, Agarwal A. Impact of oxidative stress on IVF. *Expert*  
10  
11 600 *Review of Obstetrics & Gynecology*. 2008;3(4):539-554.  
12  
13 601 <http://dx.doi.org/10.1586/17474108.3.4.539>. doi: 10.1586/17474108.3.4.539.  
14  
15  
16  
17 602 16. Agarwal A, Allamaneni SS. Role of free radicals in female reproductive diseases and assisted  
18  
19 603 reproduction. *Reprod Biomed Online*. 2004;9:338-347.  
20  
21  
22 604 17. Tracey KJ. The inflammatory reflex. *Nature*. 2002;420(6917):853-859. doi:  
23  
24 605 10.1038/nature01321 [doi].  
25  
26  
27  
28 606 18. Kiecolt-Glaser JK, McGuire L, Robles TF, Glaser R. Emotions, morbidity, and mortality: New  
29  
30 607 perspectives from psychoneuroimmunology. *Annu Rev Psychol*. 2002;53:83-107. doi:  
31  
32 608 10.1146/annurev.psych.53.100901.135217 [doi].  
33  
34  
35  
36 609 19. Csemiczky G, Landgren BM, Collins A. The influence of stress and state anxiety on the out-  
37  
38 610 come of IVF-treatment: Psychological and endocrinological assessment of swedish women entering  
39  
40 611 IVF-treatment. *Acta Obstet Gynecol Scand*. 2000;79(2):113-118.  
41  
42  
43  
44 612 20. Stoleru S, Teglas JP, Fermanian J, Spira A. Psychological factors in the aetiology of infertility:  
45  
46 613 A prospective cohort study. *Hum Reprod*. 1993;8(7):1039-1046.  
47  
48  
49 614 21. Demyttenaere K, Nijs P, Evers-Kiebooms G, Koninckx PR. Coping and the ineffectiveness of  
50  
51 615 coping influence the outcome of in vitro fertilization through stress responses. *Psychoneuroendo-*  
52  
53 616 *crinology*. 1992;17(6):655-665. doi: [http://dx.doi.org/10.1016/0306-4530\(92\)90024-2](http://dx.doi.org/10.1016/0306-4530(92)90024-2).  
54  
55  
56  
57  
58  
59  
60

- 1  
2 617 22. Sanders KA, Bruce NW. Psychosocial stress and treatment outcome following assisted repro-  
3  
4 618 ductive technology. *Human Reproduction*. 1999;14(6):1656-1662. doi: 10.1093/humrep/14.6.1656.  
5  
6  
7 619 23. Smeenk JM, Verhaak CM, Vingerhoets AJ, et al. Stress and outcome success in IVF: The role  
8  
9 620 of self-reports and endocrine variables. *Hum Reprod*. 2005;20(4):991-996.  
10  
11  
12 621 24. Ebbesen SM, Zachariae R, Mehlsen MY, et al. Stressful life events are associated with a poor  
13  
14 622 in-vitro fertilization (IVF) outcome: A prospective study. *Hum Reprod*. 2009;24(9):2173-2182. doi:  
15  
16 623 10.1093/humrep/dep185; 10.1093/humrep/dep185.  
17  
18  
19 624 25. Klonoff-Cohen H. Female and male lifestyle habits and IVF: What is known and unknown.  
20  
21 625 *Hum Reprod Update*. 2005;11(2):179-203.  
22  
23  
24 626 26. Homan GF, Davies M, Norman R. The impact of lifestyle factors on reproductive performance  
25  
26 627 in the general population and those undergoing infertility treatment: A review. *Hum Reprod Up-*  
27  
28 628 *date*. 2007;13(3):209-223. doi: 10.1093/humupd/dml056.  
29  
30  
31 629 27. Matthiesen SM, Frederiksen Y, Ingerslev HJ, Zachariae R. Stress, distress and outcome of as-  
32  
33 630 sisted reproductive technology (ART): A meta-analysis. *Hum Reprod*. 2011;26(10):2763-2776. doi:  
34  
35 631 10.1093/humrep/der246; 10.1093/humrep/der246.  
36  
37  
38 632 28. Boivin J, Griffiths E, Venetis CA. Emotional distress in infertile women and failure of assisted  
39  
40 633 reproductive technologies: Meta-analysis of prospective psychosocial studies. *BMJ*. 2011;342:d223.  
41  
42 634 doi: 10.1136/bmj.d223.  
43  
44  
45 635 29. Boivin J. A review of psychosocial interventions in infertility. *Soc Sci Med*. 2003;57(12):2325-  
46  
47 636 2341.  
48  
49  
50 637 30. de Liz TM, Strauss B. Differential efficacy of group and individual/couple psychotherapy with  
51  
52 638 infertile patients. *Hum Reprod*. 2005;20(5):1324-1332.  
53  
54  
55  
56  
57  
58  
59  
60

- 1  
2 639 31. Haemmerli K, Znoj H, Barth J. The efficacy of psychological interventions for infertile patients:  
3  
4 640 A meta-analysis examining mental health and pregnancy rate. *Hum Reprod Update*.  
5  
6 641 2009;15(3):279-295. doi: 10.1093/humupd/dmp002.  
7  
8  
9  
10 642 32. Hoffmann TC, Glasziou PP, Boutron I, et al. Better reporting of interventions: Template for  
11  
12 643 intervention description and replication (TIDieR) checklist and guide. *BMJ*. 2014;348:g1687. doi:  
13  
14 644 10.1136/bmj.g1687.  
15  
16  
17 645 33. Liberati A, Altman DG, Tetzlaff J, et al. The PRISMA statement for reporting systematic re-  
18  
19 646 views and meta-analyses of studies that evaluate health care interventions: Explanation and elabora-  
20  
21 647 tion. *PLoS Med*. 2009;6(7):e1000100. <http://dx.doi.org/10.1371%2Fjournal.pmed.1000100>.  
22  
23  
24  
25 648 34. Moher D, Liberati A, Tetzlaff J, Altman DG, The PG. Preferred reporting items for systematic  
26  
27 649 reviews and meta-analyses: The PRISMA statement. *PLoS Med*. 2009;6(7):e1000097.  
28  
29 650 <http://dx.doi.org/10.1371%2Fjournal.pmed.1000097>.  
30  
31  
32  
33 651 35. Higgins J, Green S, eds. *Cochrane handbook for systematic reviews of interventions*. Version  
34  
35 652 5.1.0 [updated March 2011] ed. The Cochrance Collaboration; 2011. Available from  
36  
37 653 [www.cochrane-handbook.org](http://www.cochrane-handbook.org).  
38  
39  
40  
41 654 36. Gurunath S, Pandian Z, Anderson RA, Bhattacharya S. Defining infertility-a systematic review  
42  
43 655 of prevalence studies. *Hum Reprod Update*. 2011;17(5):575-588.  
44  
45  
46 656 37. Jadad AR, Moore RA, Carroll D, et al. Assessing the quality of reports of randomized clinical  
47  
48 657 trials: Is blinding necessary? *Control Clin Trials*. 1996;17(1):1-12.  
49  
50  
51  
52 658 38. Greenland S, O'rourke K. On the bias produced by quality scores in meta-analysis, and a hierar-  
53  
54 659 chical view of proposed solutions. *Biostatistics*. 2001;2(4):463-471. doi:  
55  
56 660 10.1093/biostatistics/2.4.463.  
57  
58  
59  
60

- 1  
2 661 39. Cohen J. *Statistical power analysis for the behavioral sciences*. Hillsdale, N.J.: Lawrence Erl-  
3  
4 662 baum Associates; 1988.  
5  
6  
7 663 40. Hedges L, Olkin I. *Statistical methods for meta-analysis*. New York: Academic Press; 1985.  
8  
9  
10 664 41. Tuschen-Caffier B, Florin I, Krause W, Pook M. Cognitive-behavioral therapy for idiopathic  
11  
12 665 infertile couples. *Psychother Psychosom*. 1999;68(1):15-21.  
13  
14  
15  
16 666 42. Hozo S, Djulbegovic B, Hozo I. Estimating the mean and variance from the median, range, and  
17  
18 667 the size of a sample. *BMC Medical Research Methodology*. 2005;5(1):13.  
19  
20 668 <http://www.biomedcentral.com/1471-2288/5/13>.  
21  
22  
23  
24 669 43. Sterne JAC, Egger M, Moher D. Addressing reporting biases. In: John Wiley & Sons, Ltd;  
25  
26 670 2008:297-333. <http://dx.doi.org/10.1002/9780470712184.ch10>. 10.1002/9780470712184.ch10.  
27  
28  
29 671 44. Poole C, Greenland S. Random-effects meta-analyses are not always conservative. *American*  
30  
31 672 *Journal of Epidemiology*. 1999;150(5):469-475.  
32  
33  
34  
35 673 45. Higgins JP, Thompson SG, Deeks JJ, Altman DG. Measuring inconsistency in meta-analyses.  
36  
37 674 *BMJ*. 2003;327(7414):557-560. doi: 10.1136/bmj.327.7414.557.  
38  
39  
40  
41 675 46. Hedges LV, Pigott TD. The power of statistical tests in meta-analysis. *Psychol Methods*.  
42  
43 676 2001;6(3):203-217.  
44  
45  
46 677 47. Ioannidis JP, Trikalinos TA. The appropriateness of asymmetry tests for publication bias in me-  
47  
48 678 ta-analyses: A large survey. *CMAJ*. 2007;176(8):1091-1096. doi: 10.1503/cmaj.060410.  
49  
50  
51  
52 679 48. Copas J, Shi JQ. Meta-analysis, funnel plots and sensitivity analysis. *Biostatistics*.  
53  
54 680 2000;1(3):247-262. doi: 10.1093/biostatistics/1.3.247.  
55  
56  
57  
58  
59  
60

- 1  
2 681 49. Deeks JJ, Macaskill P, Irwig L. The performance of tests of publication bias and other sample  
3  
4 682 size effects in systematic reviews of diagnostic test accuracy was assessed. *J Clin Epidemiol*.  
5  
6 683 2005;58(9):882-893. doi: 10.1016/j.jclinepi.2005.01.016.  
7  
8  
9  
10 684 50. Matthias Egger, George Davey Smith, Martin Schneider, Christoph Minder. Bias in meta-  
11  
12 685 analysis detected by a simple, graphical test. *BMJ*. 1997;315(7109):629-634. doi:  
13  
14 686 10.1136/bmj.315.7109.629.  
15  
16  
17 687 51. Rosenthal R. The file drawer problem and tolerance for null results. *Psychol Bull*.  
18  
19 688 1979;86(3):638-641. doi: 10.1037/0033-2909.86.3.638.  
20  
21  
22  
23 689 52. Duval S, Tweedie R. Trim and fill: A simple funnel-plot-based method of testing and adjusting  
24  
25 690 for publication bias in meta-analysis. *Biometrics*. 2000;56(2):455-463.  
26  
27  
28  
29 691 53. Gutierrez K. Group psychological intervention in assisted human reproduction. *Rev Iberoam*  
30  
31 692 *Fertil Reprod Humana*. 2008;25(SUPPL. 1):47-54.  
32  
33  
34 693 54. Bjornsen K. Opening the door to fertility. retreat to fertile ground: Sometimes the secret to get-  
35  
36 694 ting pregnant lies in just getting away from it all. *ALTERN MED*. 2006(88):80-81.  
37  
38 695 <http://search.ebscohost.com/login.aspx?direct=true&db=c8h&AN=2009216983&site=ehost-live>.  
39  
40  
41  
42 696 55. Pengelly P, Inglis M, Cudmore L. Infertility: Couples' experiences and the use of counselling in  
43  
44 697 treatment centres. *Psychodynamic Counselling*. 1995;1(4):507-524.  
45  
46  
47 698 56. Stewart DE, Boydell KM, McCarthy K, Swerdlyk S, Redmond C, Cohrs W. A prospective  
48  
49 699 study of the effectiveness of brief professionally-led support groups for infertility patients. *Int J*  
50  
51 700 *Psychiatry Med*. 1992;22(2):173-182.  
52  
53  
54  
55 701 57. Landis JR, Koch GG. The measurement of observer agreement for categorical data. *Biometrics*.  
56  
57 702 1977;33(1):159-174.  
58  
59  
60

- 1  
2 703 58. Nilforooshan P, Ahmadi A, Abedi MR, Ahmadi M. Counseling based on interacting cognitive  
3  
4 704 subsystems and its effect on anxiety of infertile couples. *Pakistan Journal of Psychological Re-*  
5  
6 705 *search*. 2006;21(3-4):95-103.  
7  
8 706 <http://search.proquest.com.ez.statsbiblioteket.dk:2048/docview/621710509?accountid=14468>.  
9  
10  
11 707 59. Schmidt L, Holstein BE, Christensen U, Boivin J. Communication and coping as predictors of  
12  
13 708 fertility problem stress: Cohort study of 816 participants who did not achieve a delivery after 12  
14  
15 709 months of fertility treatment. *Hum Reprod*. 2005;20(11):3248-3256. doi: 10.1093/humrep/dei193.  
16  
17  
18  
19 710 60. Galhardo A, Cunha M, Pinto-Gouveia J. Mindfulness-based program for infertility: Efficacy  
20  
21 711 study. *Fertil Steril*. 2013.  
22  
23  
24  
25 712 61. Faramarzi M, Kheirkhah F, Esmaelzadeh S, Alipour A, Hjiahmadi M, Rahnama J. Is psycho-  
26  
27 713 therapy a reliable alternative to pharmacotherapy to promote the mental health of infertile women?  
28  
29 714 A randomized clinical trial. *Eur J Obstet Gynecol Reprod Biol*. 2008;141(1):49-53.  
30  
31  
32  
33 715 62. Lukse MP. The effect of group counseling on the frequency of grief reported by infertile cou-  
34  
35 716 ples. *JOGNN*. 1985;14(6):67S-70s.  
36  
37 717 <http://search.ebscohost.com/login.aspx?direct=true&db=c8h&AN=1986045607&site=ehost-live>.  
38  
39 718 doi: 10.1111/j.1552-6909.1985.tb02804.x.  
40  
41  
42  
43 719 63. Domar AD, Seibel MM, Benson H. The mind/body program for infertility: A new behavioral  
44  
45 720 treatment approach for women with infertility. *Fertil Steril*. 1990;53(2):246-249.  
46  
47  
48  
49 721 64. Domar AD, Zuttermeister PC, Seibel M, Benson H. Psychological improvement in infertile  
50  
51 722 women after behavioral treatment - a replication. *Fertil Steril*. 1992;58(1):144-147.  
52  
53  
54 723 65. Emery M, Béran M-, Darwiche J, et al. Results from a prospective, randomized, controlled  
55  
56 724 study evaluating the acceptability and effects of routine pre-IVF counselling. *Human Reproduction*.  
57  
58 725 2003;18(12):2647-2653. doi: 10.1093/humrep/deg501.  
59  
60



- 1  
2 726 66. Lee S. Effects of using a nursing crisis intervention program on psychosocial responses and  
3  
4 727 coping strategies of infertile women during in vitro fertilization. *J NURS RES*. 2003;11(3):197-207.  
5  
6 728 <http://search.ebscohost.com/login.aspx?direct=true&db=c8h&AN=2004076404&site=ehost-live>.  
7  
8  
9  
10 729 67. Chan CHY, Ng EHY, Chan CLW, Ho, Chan THY. Effectiveness of psychosocial group inter-  
11  
12 730 vention for reducing anxiety in women undergoing in vitro fertilization: A randomized controlled  
13  
14 731 study. *Fertil Steril*. 2006;85(2):339-346.  
15  
16  
17 732 68. Tuil WS, Verhaak CM, Braat DD, de Vries Robbe PF, Kremer JA. Empowering patients under-  
18  
19 733 going in vitro fertilization by providing internet access to medical data. *Fertil Steril*.  
20  
21 734 2007;88(2):361-368. doi: 10.1016/j.fertnstert.2006.11.197.  
22  
23  
24  
25 735 69. Lancaster D, Boivin J. A feasibility study of a brief coping intervention (PRCI) for the waiting  
26  
27 736 period before a pregnancy test during fertility treatment. *Hum Reprod*. 2008;23(10):2299-2307.  
28  
29  
30  
31 737 70. Mori A. Supporting stress management for women undergoing the early stages of fertility  
32  
33 738 treatment: A cluster-randomized controlled trial. *Jpn J Nurs Sci*. 2009;6(1):37-49.  
34  
35  
36 739 71. Panagopoulou E, Montgomery A, Tarlatzis B. Experimental emotional disclosure in women  
37  
38 740 undergoing infertility treatment: Are drop outs better off? *Soc Sci Med*. 2009;69(5):678-681.  
39  
40  
41  
42 741 72. Haemmerli K, Znoj H, Berger T. Internet-based support for infertile patients: A randomized  
43  
44 742 controlled study. *Journal of Behavioral Medicine*. 2010;33(2):135-146.  
45  
46  
47 743 73. Hughes EG, Da Silva AM. A pilot study assessing art therapy as a mental health intervention  
48  
49 744 for subfertile women. *Hum Reprod*. 2011;26(3):611-615.  
50  
51  
52  
53 745 74. Matthiesen S, Klonoff-Cohen H, Zachariae R, et al. The effect of an expressive writing inter-  
54  
55 746 vention (EWI) on stress in infertile couples undergoing assisted reproductive technology (ART)  
56  
57  
58  
59  
60

- 1  
2 747 treatment: A randomized controlled pilot study. *Br J Health Psychol.* 2012;17(2):362-378. doi:  
3  
4 748 10.1111/j.2044-8287.2011.02042.x; 10.1111/j.2044-8287.2011.02042.x.  
5  
6  
7 749 75. Mosalanejad L, Koolae AK, Behbahani BM. Looking out for the secret wound: The effect of  
8  
9 750 E-cognitive group therapy with emotional disclosure on the status of mental health in infertile  
10  
11 751 women. *Int J Fertil Steril.* 2012;6(2):87-94.  
12  
13  
14 752 76. Mosalanejad L, Koolae AK, Jamali S. Effect of cognitive behavioral therapy in mental health  
15  
16 753 and hardiness of infertile women receiving assisted reproductive therapy (ART). *Iranian Journal of*  
17  
18 754 *Reproductive Medicine.* 2012;10(5):483-488.  
19  
20  
21 755 77. Catoire P, Delaunay L, Dannappel T, et al. Hypnosis versus diazepam for embryo transfer: A  
22  
23 756 randomized controlled study. *Am J Clin Hypn.* 2013;55(4):378-386. doi:  
24  
25 757 10.1080/00029157.2012.747949.  
26  
27  
28  
29 758 78. Domar AD, Clapp D, Slawsby E, Kessel B, Orav J, Freizinger M. The impact of group psycho-  
30  
31 759 logical interventions on distress in infertile women. *Health Psychology.* 2000;19(6):568-575.  
32  
33 760 <http://search.proquest.com.ez.statsbiblioteket.dk:2048/docview/619538260?accountid=14468>. doi:  
34  
35 761 <http://dx.doi.org.ez.statsbiblioteket.dk:2048/10.1037/0278-6133.19.6.568>.  
36  
37  
38  
39 762 79. O'Moore AM, O'Moore RR, Harrison RF. Psychosomatic aspects in idiopathic infertility: Ef-  
40  
41 763 fects of treatment with autogenic training. *J Psychosom Res.* 1983;27(2):145-151.  
42  
43  
44 764 80. McQueeney D, Stanton A, Sigmon S. Efficacy of emotion-focused and problem-focused group  
45  
46 765 therapies for women with fertility problems. *J Behav Med.* 1997;20(4):313-331. doi:  
47  
48 766 10.1023/A:1025560912766.  
49  
50  
51 767 81. Koszycki D, Bisserbe J, Blier P, Bradwejn J, Markowitz J. Interpersonal psychotherapy versus  
52  
53 768 brief supportive therapy for depressed infertile women: First pilot randomized controlled trial. *Ar-*  
54  
55 769 *chives of Women's Mental Health.* 2012;15(3):193-201.  
56  
57  
58  
59  
60

- 1  
2 770 82. Galletly C, Clark A, Tomlinson L, Blaney F. Improved pregnancy rates for obese, infertile  
3  
4 771 women following a group treatment program: An open pilot study. *General Hospital Psychiatry*.  
5  
6 772 1996;18(3):192-195.  
7  
8  
9  
10 773 83. Cousineau TM, Green TC, Corsini E, et al. Online psychoeducational support for infertile wom-  
11  
12 774 en: A randomized controlled trial. *Hum Reprod*. 2008;23(3):554-566.  
13  
14  
15 775 84. Noorbala AA, Ramazanzadeh F, Malekafzali H, et al. Effects of a psychological intervention on  
16  
17 776 depression in infertile couples. *Int J Gynecol Obstet*. 2008;101(3):248-252.  
18  
19  
20  
21 777 85. Sexton MB, Byrd MR, O'Donohue WT, Jacobs NN. Web-based treatment for infertility-related  
22  
23 778 psychological distress. *Arch Women's Ment Health*. 2010;13(4):347-358.  
24  
25  
26 779 86. Sarrel PM, DeCherney AH. Psychotherapeutic intervention for treatment of couples with sec-  
27  
28 780 ondary infertility. *Fertil Steril*. 1985;43(6):897-900.  
29  
30  
31  
32 781 87. Hosaka T, Matsubayashi H, Sugiyama Y, Izumi S, Makino T. Effect of psychiatric group inter-  
33  
34 782 vention on natural-killer cell activity and pregnancy rate. *Gen Hosp Psychiatry*. 2002;24(5):353-  
35  
36 783 356.  
37  
38  
39  
40 784 88. Levitas E, Parmet A, Lunenfeld E, et al. Impact of hypnosis during embryo transfer on the out-  
41  
42 785 come of in vitro fertilization-embryo transfer: A case-control study. *Fertil Steril*. 2006;85(5):1404-  
43  
44 786 1408. doi: 10.1016/j.fertnstert.2005.10.035.  
45  
46  
47  
48 787 89. Domar AD, Rooney KL, Wiegand B, et al. Impact of a group mind/body intervention on preg-  
49  
50 788 nancy rates in IVF patients. *Fertil Steril*. 2011;95(7):2269-2273. doi:  
51  
52 789 <http://dx.doi.org/10.1016/j.fertnstert.2011.03.046>.  
53  
54  
55  
56  
57  
58  
59  
60

- 1  
2 790 90. Gorayeb R, Borsari AC, Rosa-e-Silva AC, Ferriani RA. Brief cognitive behavioral intervention  
3  
4 791 in groups in a brazilian assisted reproduction program. *Behav Med.* 2012;38(2):29-35. doi:  
5  
6 792 10.1080/08964289.2012.654834; 10.1080/08964289.2012.654834.  
7  
8  
9  
10 793 91. Terzioglu F. Investigation into effectiveness of counseling on assisted reproductive techniques  
11  
12 794 in turkey. *J Psychosom Obstet Gynecol.* 2001;22(3):133-141.  
13  
14  
15 795 92. de Klerk C, Hunfeld JAM, Duivenvoorden HJ, et al. Effectiveness of a psychosocial counselling  
16  
17 796 intervention for first-time IVF couples: A randomized controlled trial. *Hum Reprod.*  
18  
19 797 2005;20(5):1333-1338.  
20  
21  
22  
23 798 93. Vizheh M, Pakgohar M, Babaei G, Ramezanzadeh F. Effect of counseling on quality of marital  
24  
25 799 relationship of infertile couples: A randomized, controlled trial (RCT) study. *Arch Gynecol Obstet.*  
26  
27 800 2013;287(3):583-589.  
28  
29  
30  
31 801 94. Chan CH, Chan CL, Ng EH, et al. Incorporating spirituality in psychosocial group intervention  
32  
33 802 for women undergoing in vitro fertilization: A prospective randomized controlled study. *Psychol*  
34  
35 803 *Psychother.* 2012;85(4):356-373.  
36  
37  
38  
39 804 95. Domar A, Clapp D, Slawsby E, Dusek J, Kessel B, Freizinger M. Impact of group psychological  
40  
41 805 interventions on pregnancy rates in infertile women. *Fertil Steril.* 2000;73(4):805-811. doi:  
42  
43 806 10.1016/S0015-0282(99)00493-8.  
44  
45  
46  
47 807 96. McNaughton-Cassill M, Bostwick JM, Arthur NJ, Robinson RD, Neal GS. Efficacy of brief  
48  
49 808 couples support groups developed to manage the stress of in vitro fertilization treatment. *Mayo Clin*  
50  
51 809 *Proc.* 2002;77(10):1060-1066.  
52  
53 810 <http://search.ebscohost.com/login.aspx?direct=true&db=c8h&AN=2003034100&site=ehost-live>.  
54  
55  
56  
57 811 97. Galhardo A, Cunha M, Pinto-Gouveia J. Developing mindfulness and acceptance skills in infer-  
58  
59 812 tility: The mindfulness based program for infertility. *Aten Prim.* 2013;45:143.  
60

- 1  
2 813 98. Chen JH, Bierhals AJ, Prigerson HG, Kasl SV, Mazure CM, Jacobs S. Gender differences in the  
3  
4 814 effects of bereavement-related psychological distress in health outcomes. *Psychol Med*.  
5  
6 815 1999;29(2):367-380.  
7  
8  
9  
10 816 99. Navot D, Bergh RA, Williams MA, et al. Poor oocyte quality rather than implantation failure as  
11  
12 817 a cause of age-related decline in female fertility. *The Lancet*. 1991;337(8754):1375-1377. doi:  
13  
14 818 [http://dx.doi.org/10.1016/0140-6736\(91\)93060-M](http://dx.doi.org/10.1016/0140-6736(91)93060-M).  
15  
16  
17 819 100. Dunson DB, Colombo B, Baird DD. Changes with age in the level and duration of fertility in  
18  
19 820 the menstrual cycle. *Human Reproduction*. 2002;17(5):1399-1403. doi: 10.1093/humrep/17.5.1399.  
20  
21  
22  
23 821 101. Van den Broeck U, Emery M, Wischmann T, Thorn P. Counselling in infertility: Individual,  
24  
25 822 couple and group interventions. *Patient Educ Couns*. 2010;81(3):422-428. doi:  
26  
27 823 10.1016/j.pec.2010.10.009.  
28  
29  
30  
31 824 102. Burns LH, Covington SN. *Infertility counseling: A comprehensive handbook for clinicians*.  
32  
33 825 New York, NY, US: Parthenon Publishing Group; 1999:xvii.  
34  
35  
36 826 103. Boivin J, Appleton TC, Baetens P, et al. Guidelines for counselling in infertility: Outline ver-  
37  
38 827 sion. *Hum Reprod*. 2001;16(6):1301-1304.  
39  
40  
41  
42 828 104. Boivin J, Kentenich H, eds. *Guidelines for counselling in infertility*. ESHRE Monographs: Ox-  
43  
44 829 ford University Press; 2002.  
45  
46  
47 830 105. Gameiro S, Boivin J, Domar A. Optimal in vitro fertilization in 2020 should reduce treatment  
48  
49 831 burden and enhance care delivery for patients and staff. *Fertil Steril*. 2013;100(2):302-309. doi:  
50  
51 832 10.1016/j.fertnstert.2013.06.015 [doi].  
52  
53  
54  
55  
56  
57  
58  
59  
60

1  
2  
3  
4  
5  
6  
7  
8  
9  
10  
11  
12  
13  
14  
15  
16  
17  
18  
19  
20  
21  
22  
23  
24  
25  
26  
27  
28  
29  
30  
31  
32  
33  
34  
35  
36  
37  
38  
39  
40  
41  
42  
43  
44  
45  
46  
47  
48  
49  
50  
51  
52  
53  
54  
55  
56  
57  
58  
59  
60

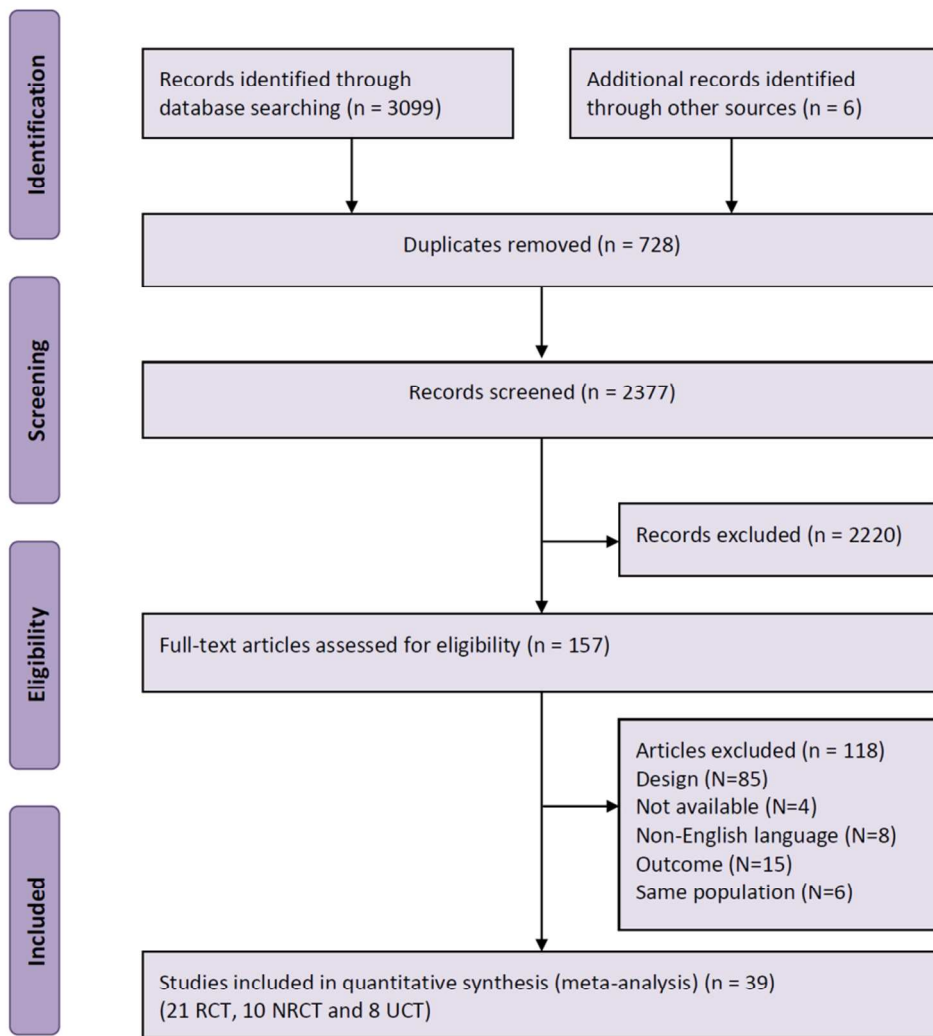

Figure 1. PRISMA flowchart of selection of studies  
90x98mm (300 x 300 DPI)

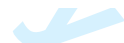

1  
2  
3  
4  
5  
6  
7  
8  
9  
10  
11  
12  
13  
14  
15  
16  
17  
18  
19  
20  
21  
22  
23  
24  
25  
26  
27  
28  
29  
30  
31  
32  
33  
34  
35  
36  
37  
38  
39  
40  
41  
42  
43  
44  
45  
46  
47  
48  
49  
50  
51  
52  
53  
54  
55  
56  
57  
58  
59  
60

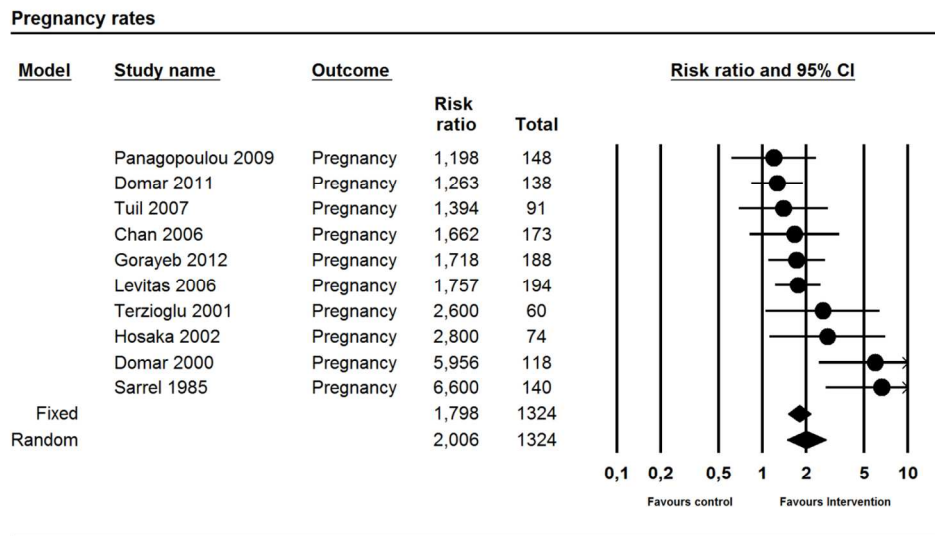

Figure 2. Effects of psychosocial intervention on pregnancy rates  
154x90mm (300 x 300 DPI)

review only

Combined psychological outcomes

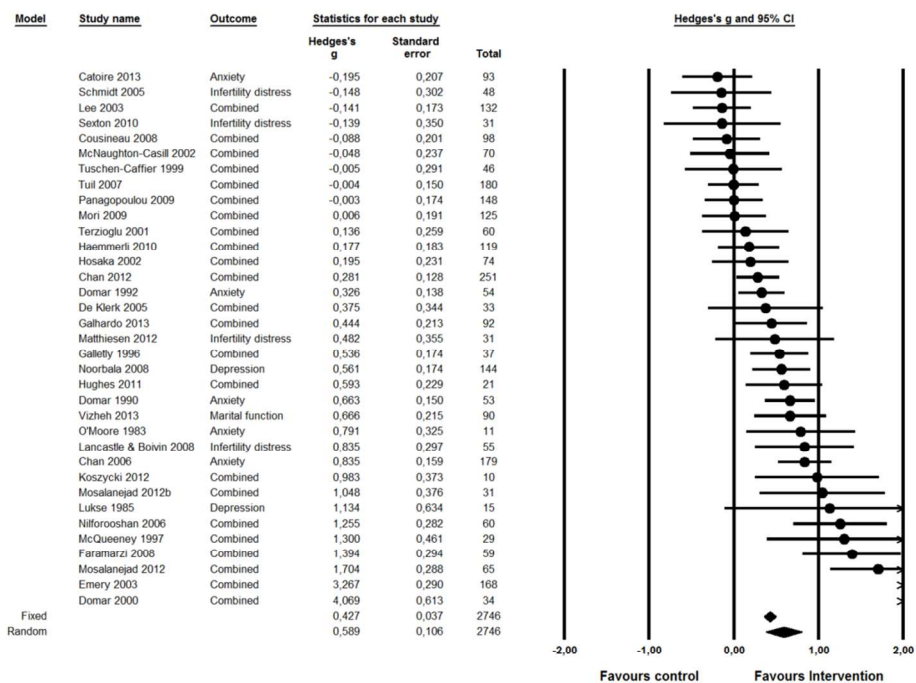

Figure 3. Effects of psychosocial intervention on combined psychological outcomes 112x90mm (300 x 300 DPI)



## Complete search history

(1978 – April 2014)

|                                       | PsycInfo | Pubmed  | Cochrane | Embase  | Web of Science | Cinahl |
|---------------------------------------|----------|---------|----------|---------|----------------|--------|
| <b>Search 1:</b>                      |          |         |          |         |                |        |
| #1 infertil*                          | 1686     | 69.582  | 2878     | 143.265 | 45.208         | 4425   |
| #2 childlessness                      | 427      | 557     | 9        | 715     | 767            | 113    |
| #3 "IVF"                              | 321      | 17.130  | 2505     | 27.748  | 19.434         | 651    |
| #4 "ICSI"                             | 54       | 5489    | 1106     | 14.179  | 7453           | 135    |
| #5 "fertility treatment"              | 78       | 664     | 70       | 1215    | 747            | 149    |
| #6 "fertility Problems"               | 78       | 89      | 44       | 862     | 674            | 79     |
| #7 "in vitro fertil*"                 | 412      | 8742    | 1894     | 101.673 | 22.836         | 761    |
| #8 "intracytoplasmic sperm injection" | 30       | 4889    | 723      | 13.027  | 7683           | 146    |
| #9 "assisted reproduction"            | 176      | 4623    | 613      | 10.218  | 5963           | 277    |
| #10 "assisted reproductive techn*"    | 218      | 6903    | 280      | 10.913  | 6250           | 505    |
| #11 (#1 - #10:OR)                     | 2560     | 91.369  | 5752     | 202.041 | 75.747         | 5571   |
| <b>Search 2:</b>                      |          |         |          |         |                |        |
| #12 "psychological intervention"      | 1330     | 1040    | 537      | 1807    | 1300           | 339    |
| #13 "psychosocial intervention"       | 1047     | 1002    | 486      | 1504    | 1230           | 376    |
| #14 "social support"                  | 30.469   | 58.658  | 3454     | 61.497  | 36.355         | 10.702 |
| #15 "couples therapy"                 | 1895     | 495     | 114      | 2543    | 477            | 75     |
| #16 psychoeducation                   | 3551     | 1285    | 486      | 4419    | 1835           | 1560   |
| #17 psychotherapy                     | 119.862  | 159.004 | 7493     | 180.754 | 47.223         | 12.808 |
| #18 "CBT"                             | 5663     | 5017    | 2131     | 10.338  | 6326           | 1360   |
| #19 "cognitive-behavior* therapy"     | 13.914   | 1259    | 3706     | 32.160  | 13.056         | 2358   |

|                                         |            |            |           |             |            |           |
|-----------------------------------------|------------|------------|-----------|-------------|------------|-----------|
| #20 "cognitive-behavior* intervention"  | 750        | 9          | 389       | 18          | 791        | 194       |
| #21 mindfulness                         | 2912       | 1743       | 536       | 2555        | 3156       | 854       |
| #22 "acceptance and commitment therapy" | 512        | 214        | 95        | 387         | 382        | 64        |
| #23 "emotion-focused"                   | 1377       | 796        | 83        | 969         | 1063       | 448       |
| #24 psychoanalysis                      | 51.485     | 11.421     | 81        | 28432       | 16.717     | 627       |
| # 25 "relational therapy"               | 82         | 20         | 2         | 31          | 32         | 4         |
| #26 relaxation                          | 9334       | 107.502    | 6121      | 116.625     | 305.797    | 6933      |
| #27 hypnosis                            | 10.571     | 12.898     | 1063      | 11.503      | 7490       | 1850      |
| #28 hypnotherapy                        | 3506       | 13.068     | 217       | 1206        | 1122       | 226       |
| #29 "internet-based therapy"            | 26         | 22         | 12        | 36          | 29         | 6         |
| #30 "internet-based intervention"       | 107        | 121        | 66        | 124         | 129        | 32        |
| #31 "web-based therapy"                 | 15         | 7          | 2         | 12          | 14         | 3         |
| #32 "web-based intervention"            | 135        | 218        | 117       | 249         | 257        | 68        |
| #33 (#12 - #32:OR)                      | 219.898    | 327.062    | 20.473    | 379.392     | 429.409    | 36.993    |
| <b>Search 3:</b>                        | <b>311</b> | <b>593</b> | <b>77</b> | <b>1708</b> | <b>328</b> | <b>82</b> |

## Total of all searches

|               | Initial search<br>(combination 1+2) | Additional records | Excluded<br>(due to duplicates) | Excluded<br>(due to title + abstract) | Final**<br>(articles coded individually) |
|---------------|-------------------------------------|--------------------|---------------------------------|---------------------------------------|------------------------------------------|
| All databases | 3099                                | 6                  | 728                             | 2220                                  | 157                                      |

- Additional records identified n=6

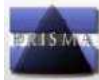

# PRISMA 2009 Checklist

1  
2  
3  
4  
5  
6  
7  
8  
9  
10  
11  
12  
13  
14  
15  
16  
17  
18  
19  
20  
21  
22  
23  
24  
25  
26  
27  
28  
29  
30  
31  
32  
33  
34  
35  
36  
37  
38  
39  
40  
41  
42  
43  
44  
45  
46  
47  
48  
49

| Section/topic                      | #  | Checklist item                                                                                                                                                                                                                                                                                              | Reported on page # |
|------------------------------------|----|-------------------------------------------------------------------------------------------------------------------------------------------------------------------------------------------------------------------------------------------------------------------------------------------------------------|--------------------|
| <b>TITLE</b>                       |    |                                                                                                                                                                                                                                                                                                             |                    |
| Title                              | 1  | Identify the report as a systematic review, meta-analysis, or both.                                                                                                                                                                                                                                         | 1                  |
| <b>ABSTRACT</b>                    |    |                                                                                                                                                                                                                                                                                                             |                    |
| Structured summary                 | 2  | Provide a structured summary including, as applicable: background; objectives; data sources; study eligibility criteria, participants, and interventions; study appraisal and synthesis methods; results; limitations; conclusions and implications of key findings; systematic review registration number. | 2                  |
| <b>INTRODUCTION</b>                |    |                                                                                                                                                                                                                                                                                                             |                    |
| Rationale                          | 3  | Describe the rationale for the review in the context of what is already known.                                                                                                                                                                                                                              | 3-5                |
| Objectives                         | 4  | Provide an explicit statement of questions being addressed with reference to participants, interventions, comparisons, outcomes, and study design (PICOS).                                                                                                                                                  | 5                  |
| <b>METHODS</b>                     |    |                                                                                                                                                                                                                                                                                                             |                    |
| Protocol and registration          | 5  | Indicate if a review protocol exists, if and where it can be accessed (e.g., Web address), and, if available, provide registration information including registration number.                                                                                                                               |                    |
| Eligibility criteria               | 6  | Specify study characteristics (e.g., PICOS, length of follow-up) and report characteristics (e.g., years considered, language, publication status) used as criteria for eligibility, giving rationale.                                                                                                      | 5-6                |
| Information sources                | 7  | Describe all information sources (e.g., databases with dates of coverage, contact with study authors to identify additional studies) in the search and date last searched.                                                                                                                                  | 5                  |
| Search                             | 8  | Present full electronic search strategy for at least one database, including any limits used, such that it could be repeated.                                                                                                                                                                               | 5                  |
| Study selection                    | 9  | State the process for selecting studies (i.e., screening, eligibility, included in systematic review, and, if applicable, included in the meta-analysis).                                                                                                                                                   | 5-6                |
| Data collection process            | 10 | Describe method of data extraction from reports (e.g., piloted forms, independently, in duplicate) and any processes for obtaining and confirming data from investigators.                                                                                                                                  | 6-7                |
| Data items                         | 11 | List and define all variables for which data were sought (e.g., PICOS, funding sources) and any assumptions and simplifications made.                                                                                                                                                                       | 6                  |
| Risk of bias in individual studies | 12 | Describe methods used for assessing risk of bias of individual studies (including specification of whether this was done at the study or outcome level), and how this information is to be used in any data synthesis.                                                                                      | 8                  |
| Summary measures                   | 13 | State the principal summary measures (e.g., risk ratio, difference in means).                                                                                                                                                                                                                               |                    |
| Synthesis of results               | 14 | Describe the methods of handling data and combining results of studies, if done, including measures of consistency (e.g., $I^2$ for each meta-analysis).                                                                                                                                                    | 8-10               |

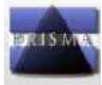

# PRISMA 2009 Checklist

Page 1 of 2

| Section/topic                 | #  | Checklist item                                                                                                                                                                                           | Reported on page # |
|-------------------------------|----|----------------------------------------------------------------------------------------------------------------------------------------------------------------------------------------------------------|--------------------|
| Risk of bias across studies   | 15 | Specify any assessment of risk of bias that may affect the cumulative evidence (e.g., publication bias, selective reporting within studies).                                                             | 9-10               |
| Additional analyses           | 16 | Describe methods of additional analyses (e.g., sensitivity or subgroup analyses, meta-regression), if done, indicating which were pre-specified.                                                         | 9                  |
| <b>RESULTS</b>                |    |                                                                                                                                                                                                          |                    |
| Study selection               | 17 | Give numbers of studies screened, assessed for eligibility, and included in the review, with reasons for exclusions at each stage, ideally with a flow diagram.                                          | 10-11              |
| Study characteristics         | 18 | For each study, present characteristics for which data were extracted (e.g., study size, PICOS, follow-up period) and provide the citations.                                                             | 10-11              |
| Risk of bias within studies   | 19 | Present data on risk of bias of each study and, if available, any outcome level assessment (see item 12).                                                                                                | 13-17              |
| Results of individual studies | 20 | For all outcomes considered (benefits or harms), present, for each study: (a) simple summary data for each intervention group (b) effect estimates and confidence intervals, ideally with a forest plot. | 19-20              |
| Synthesis of results          | 21 | Present results of each meta-analysis done, including confidence intervals and measures of consistency.                                                                                                  | 22-28              |
| Risk of bias across studies   | 22 | Present results of any assessment of risk of bias across studies (see Item 15).                                                                                                                          | 26-28              |
| Additional analysis           | 23 | Give results of additional analyses, if done (e.g., sensitivity or subgroup analyses, meta-regression [see Item 16]).                                                                                    | 26-28              |
| <b>DISCUSSION</b>             |    |                                                                                                                                                                                                          |                    |
| Summary of evidence           | 24 | Summarize the main findings including the strength of evidence for each main outcome; consider their relevance to key groups (e.g., healthcare providers, users, and policy makers).                     | 28-29              |
| Limitations                   | 25 | Discuss limitations at study and outcome level (e.g., risk of bias), and at review-level (e.g., incomplete retrieval of identified research, reporting bias).                                            | 30-32              |
| Conclusions                   | 26 | Provide a general interpretation of the results in the context of other evidence, and implications for future research.                                                                                  | 32-33              |
| <b>FUNDING</b>                |    |                                                                                                                                                                                                          |                    |
| Funding                       | 27 | Describe sources of funding for the systematic review and other support (e.g., supply of data); role of funders for the systematic review.                                                               | 34                 |

From: Moher D, Liberati A, Tetzlaff J, Altman DG, The PRISMA Group (2009). Preferred Reporting Items for Systematic Reviews and Meta-Analyses: The PRISMA Statement. PLoS Med 6(6): e1000097. doi:10.1371/journal.pmed1000097

For more information, visit: [www.prisma-statement.org](http://www.prisma-statement.org).

Page 2 of 2

For peer review only - <http://bmjopen.bmj.com/site/about/guidelines.xhtml>
