# Supplementary material for: Efficacy of psychosocial interventions for psychological and pregnancy outcomes in infertile women and men: a systematic review and meta-analysis
Source: HighWire-hosted journal article supplement (doi:10.1136/bmjopen-2014-006592), 2015-01-01
Supplement: bmjopen-2014-006592supp.pdf [file bmjopen-2014-006592supp.pdf]

## Complete search history

(1978 – April 2014)

|                                       | PsycInfo | Pubmed  | Cochrane | Embase  | Web of Science | Cinahl |
|---------------------------------------|----------|---------|----------|---------|----------------|--------|
| <b>Search 1:</b>                      |          |         |          |         |                |        |
| #1 infertil*                          | 1686     | 69.582  | 2878     | 143.265 | 45.208         | 4425   |
| #2 childlessness                      | 427      | 557     | 9        | 715     | 767            | 113    |
| #3 "IVF"                              | 321      | 17.130  | 2505     | 27.748  | 19.434         | 651    |
| #4 "ICSI"                             | 54       | 5489    | 1106     | 14.179  | 7453           | 135    |
| #5 "fertility treatment"              | 78       | 664     | 70       | 1215    | 747            | 149    |
| #6 "fertility Problems"               | 78       | 89      | 44       | 862     | 674            | 79     |
| #7 "in vitro fertil*"                 | 412      | 8742    | 1894     | 101.673 | 22.836         | 761    |
| #8 "intracytoplasmic sperm injection" | 30       | 4889    | 723      | 13.027  | 7683           | 146    |
| #9 "assisted reproduction"            | 176      | 4623    | 613      | 10.218  | 5963           | 277    |
| #10 "assisted reproductive techn*"    | 218      | 6903    | 280      | 10.913  | 6250           | 505    |
| #11 (#1 - #10:OR)                     | 2560     | 91.369  | 5752     | 202.041 | 75.747         | 5571   |
| <b>Search 2:</b>                      |          |         |          |         |                |        |
| #12 "psychological intervention"      | 1330     | 1040    | 537      | 1807    | 1300           | 339    |
| #13 "psychosocial intervention"       | 1047     | 1002    | 486      | 1504    | 1230           | 376    |
| #14 "social support"                  | 30.469   | 58.658  | 3454     | 61.497  | 36.355         | 10.702 |
| #15 "couples therapy"                 | 1895     | 495     | 114      | 2543    | 477            | 75     |
| #16 psychoeducation                   | 3551     | 1285    | 486      | 4419    | 1835           | 1560   |
| #17 psychotherapy                     | 119.862  | 159.004 | 7493     | 180.754 | 47.223         | 12.808 |
| #18 "CBT"                             | 5663     | 5017    | 2131     | 10.338  | 6326           | 1360   |
| #19 "cognitive-behavior* therapy"     | 13.914   | 1259    | 3706     | 32.160  | 13.056         | 2358   |

|                                         |            |            |           |             |            |           |
|-----------------------------------------|------------|------------|-----------|-------------|------------|-----------|
| #20 "cognitive-behavior* intervention"  | 750        | 9          | 389       | 18          | 791        | 194       |
| #21 mindfulness                         | 2912       | 1743       | 536       | 2555        | 3156       | 854       |
| #22 "acceptance and commitment therapy" | 512        | 214        | 95        | 387         | 382        | 64        |
| #23 "emotion-focused"                   | 1377       | 796        | 83        | 969         | 1063       | 448       |
| #24 psychoanalysis                      | 51.485     | 11.421     | 81        | 28432       | 16.717     | 627       |
| # 25 "relational therapy"               | 82         | 20         | 2         | 31          | 32         | 4         |
| #26 relaxation                          | 9334       | 107.502    | 6121      | 116.625     | 305.797    | 6933      |
| #27 hypnosis                            | 10.571     | 12.898     | 1063      | 11.503      | 7490       | 1850      |
| #28 hypnotherapy                        | 3506       | 13.068     | 217       | 1206        | 1122       | 226       |
| #29 "internet-based therapy"            | 26         | 22         | 12        | 36          | 29         | 6         |
| #30 "internet-based intervention"       | 107        | 121        | 66        | 124         | 129        | 32        |
| #31 "web-based therapy"                 | 15         | 7          | 2         | 12          | 14         | 3         |
| #32 "web-based intervention"            | 135        | 218        | 117       | 249         | 257        | 68        |
| #33 (#12 - #32:OR)                      | 219.898    | 327.062    | 20.473    | 379.392     | 429.409    | 36.993    |
| <b>Search 3:</b>                        | <b>311</b> | <b>593</b> | <b>77</b> | <b>1708</b> | <b>328</b> | <b>82</b> |

Total of all searches

|               | Initial search<br>(combination 1+2) | Additional records | Excluded<br>(due to duplicates) | Excluded<br>(due to title + abstract) | Final**<br>(articles coded individually) |
|---------------|-------------------------------------|--------------------|---------------------------------|---------------------------------------|------------------------------------------|
| All databases | 3099                                | 6                  | 728                             | 2220                                  | 157                                      |

- Additional records identified n=6
